# Supplementary material
Source: PubMed Central journal article supplement (PMC2519900)

# Remote Control of Diastereoselectivity in Intramolecular Reactions of Chiral Allylsilanes

Weston R. Judd, Sooho Ban, and Jeffrey Aubé\*

*Department of Medicinal Chemistry, University of Kansas, 1251 Wescoe Hall Drive, Malott Hall, Room 4070, Lawrence, KS 66045-7582*

*jaube@ku.edu*

## Supporting Information

|                                                                                 |    |
|---------------------------------------------------------------------------------|----|
| List of Known Compounds.....                                                    | 2  |
| Preparation of Chiral Allylic Alcohols.....                                     | 2  |
| Preparation of Chiral Allylsilanes.....                                         | 14 |
| TiCl <sub>4</sub> -Promoted Cyclization Reactions .....                         | 18 |
| TFA-Promoted Cyclization Reactions .....                                        | 25 |
| TMSOTf-Promoted Oxenium Cyclization Reactions .....                             | 36 |
| Determination of Absolute Configuration.....                                    | 38 |
| Determination of Enantiomeric Purities.....                                     | 46 |
| References .....                                                                | 47 |
| Copies of <sup>1</sup> H and <sup>13</sup> C NMR Spectra of New Compounds ..... | 48 |

## Corresponding author:

Professor Jeffrey Aubé  
Department of Medicinal Chemistry  
1251 Wescoe Hall Drive, Room 4070  
Malott Hall  
University of Kansas  
Lawrence, Kansas 66045-7582

Tel 785.864.4496  
Fax 785.864.5326  
E-mail: jaube@ku.edu

## List of Known Compounds

The following compounds are known: (*E*)-5-(trimethylsilyl)pent-3-en-1-ol (**D4**),<sup>1</sup> 1-chloro-2,2,2-trimethyl-1,1-diphenyldisilane,<sup>2</sup> (4*S*)-2-(4'-methoxyphenyl)-1,3-dioxan-4-ylmethanol (**A1**),<sup>3</sup> (4*S*)-2-(4'-methoxyphenyl)-1,3-dioxane-4-carbaldehyde (**A2**),<sup>3</sup> but-3-enyl pivalate (**1.30**),<sup>4</sup> 1-benzyloxy-3-butyne (**6**),<sup>5</sup> 1-benzyloxy-5-hexyne (**B2**),<sup>6</sup> 1-tert-butyl-diphenylsilyloxy-3-butyne (**B3**),<sup>7</sup> 4-methoxy-benzyloxy-3-butyne (**B4**),<sup>8</sup> and ethyl 4-(*N*-tert-butoxycarbonylamino)-3-formylbenzoate.<sup>1</sup>

## Preparation of Chiral Allylic Alcohols

Allylic alcohol **3** was prepared from the *p*-methoxybenzyl acetonide of (*S*)-(-)-1,2,4-butanetriol (**A1**)<sup>3</sup> (Scheme A). Moffatt oxidation<sup>9</sup> of **A1** afforded aldehyde **A2**,<sup>3</sup> which was used without further purification. The olefin moiety was then installed via a Wittig reaction to give a 12.5:1 mixture of *Z/E* isomers that were separable by chromatography. DIBAL-H reduction of the major *Z* isomer **A3** followed by protecting group manipulations afforded allylic alcohol **3**.

Scheme A. Synthesis of allylic alcohol **3**.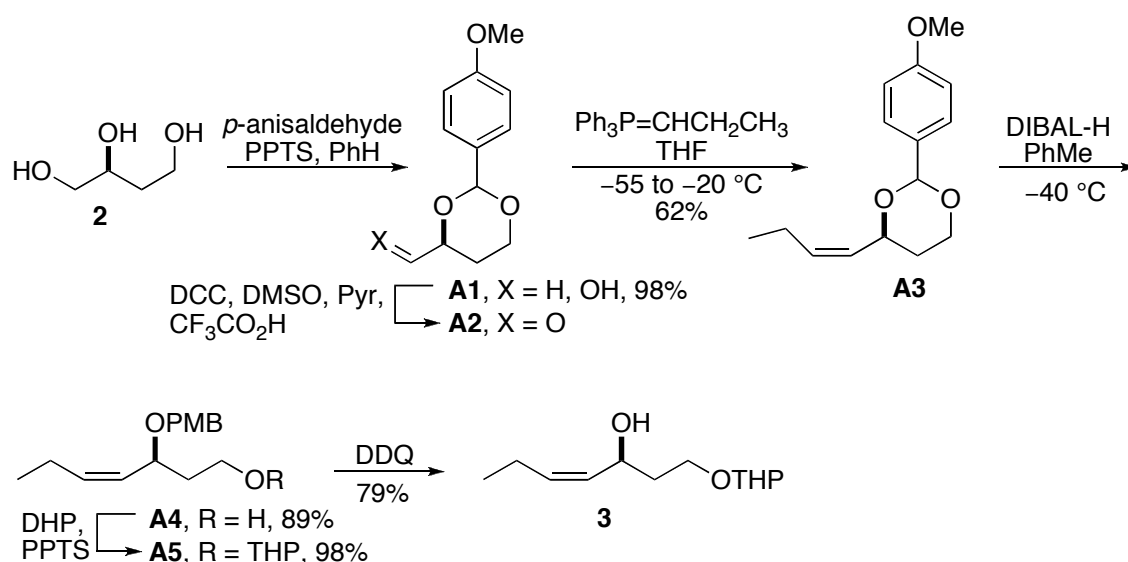

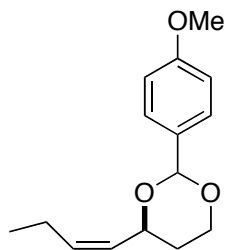

**(3*S*,*Z*)-4-But-1-enyl-2-(4'-methoxyphenyl)[1,3]dioxane (A3).** *n*-BuLi (1.0 M, 22.7 mL) was added to a solution of propyltriphenylphosphonium bromide (11.6 g, 30.3 mmol) in THF (60 mL) at 0 °C. After stirring for 20 min, the reaction mixture was cooled to −78 °C, and aldehyde **A2** was added as a solution in THF (20 mL). The reaction mixture was allowed to slowly warm to −20 °C, and was stirred for an additional 6 h. After warming to 0 °C, the reaction was quenched with water (50 mL) and extracted with ether (3 × 50 mL). The combined organic extracts were washed with brine, dried (Na<sub>2</sub>SO<sub>4</sub>), filtered, and concentrated. The residue obtained was triturated with hexanes and filtered. The filtrate was concentrated to give a crude oil containing ca. 12.5:1 (*Z/E*) mixture of olefin isomers. The crude product mixture was purified by chromatography (20:1 hexanes:EtOAc) to give 2.4 g (64%) of (*Z*)-**A3** as a colorless oil. [ $\alpha$ ]<sub>D</sub> +61.6 (*c* 1.00, CDCl<sub>3</sub>). <sup>1</sup>H NMR (400 MHz, CDCl<sub>3</sub>)  $\delta$  1.03 (t, *J* = 7.5 Hz, 3H), 1.50 (m, 1H), 1.98 (m, 1H), 2.17 (m, 2H), 3.81 (s, 3H), 4.02 (dt, *J* = 2.4, 12.4 Hz, 1H), 4.28 (ddd, *J* = 1.2, 5.0, 11.4 Hz, 1H), 4.69 (m, 1H), 5.49 (dd, *J* = 7.7, 11.0 Hz, 1H), 5.55 (m, 2H), 6.91 (d, *J* = 8.8 Hz, 2H), 7.44 (d, *J* = 8.7 Hz, 2H); <sup>13</sup>C NMR (100.6 MHz, CDCl<sub>3</sub>)  $\delta$  14.7, 21.7, 31.4, 55.7, 67.3, 74.0, 101.5, 114.0, 127.8, 129.4, 131.7, 134.4, 160.3; IR (film) 1615 cm<sup>−1</sup>; MS (CI) *m/z* 249 (M<sup>+</sup> + H), 152, 95; HRMS calcd for C<sub>15</sub>H<sub>21</sub>O<sub>3</sub> (M<sup>+</sup> + H) 249.1491, found 249.1509.

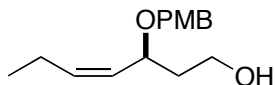

**(3*S*,*Z*)-3-(4'-Methoxybenzyloxy)hept-4-en-1-ol (A4).** Diisobutylaluminum hydride (37 mL, 1.5 M solution in toluene) was added to a solution of **A3** (2.73 g, 11.0 mmol) in anhydrous toluene (50 mL) at −40 °C. After stirring at −40 °C for 2h, the

reaction was quenched by the slow addition of MeOH (20 mL). The resulting mixture was subsequently stirred in the presence of saturated aqueous potassium sodium tartrate (50 mL) while warming to room temperature for 10 h. The phases thus formed were separated and the aqueous layer was extracted with CH<sub>2</sub>Cl<sub>2</sub> (3 × 50 mL). The combined organic layers were dried (Na<sub>2</sub>SO<sub>4</sub>), filtered, and concentrated. The crude material was purified by chromatography (3:1 hexanes:EtOAc) to afford 2.5 g (91%) of a colorless oil.  $[\alpha]_D -45.0$  (c 1.25, CHCl<sub>3</sub>). <sup>1</sup>H NMR (400 MHz, CDCl<sub>3</sub>) δ 1.01 (t, *J* = 7.5 Hz, 3H), 1.69 (m, 1H), 1.89 (m, 1H), 2.08 (m, 2H), 2.64 (br, s, 1H), 3.76 (m, 2H), 3.82 (s, 3H), 4.28 (d, *J* = 11.4 Hz, 1H), 4.40 (dt, *J* = 4.3, 8.6 Hz, 1H), 4.55 (d, *J* = 11.4 Hz, 1H), 5.35 (m, 1H), 5.64 (dt, *J* = 11.0, 7.4 Hz, 1H), 6.89 (dt, *J* = 8.7, 2.0 Hz, 2H), 7.25 (d, *J* = 8.6 Hz, 2H); <sup>13</sup>C NMR (100.6 MHz, CDCl<sub>3</sub>) δ 14.7, 21.5, 38.3, 55.7, 61.4, 70.0, 74.1, 114.2, 129.7, 129.8, 130.8, 135.8, 159.6; IR (film) 3413, 1613, 1514 cm<sup>-1</sup>; MS (EI) *m/z* 268 (M<sup>+</sup> + NH<sub>4</sub>), 137, 121; HRMS calcd for C<sub>15</sub>H<sub>26</sub>NO<sub>3</sub> (M<sup>+</sup> + NH<sub>4</sub>) 268.1913, found 268.1930.

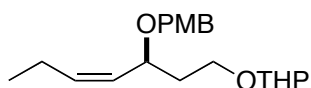

**2-[(3*S*,*Z*)-3'-(4''-Methoxybenzyloxy)hept-4'-enyloxy]tetrahydro-2*H*-pyran**

**(A5).** DHP (1.0 g, 12.0 mmol) was added to a solution of **A4** (1.88 g, 7.51 mmol) and PPTS (0.09 g, 0.38 mmol) in THF (35 mL) at 0 °C. The reaction mixture was allowed to warm to room temperature and stirred for 16 h. A saturated aqueous NaHCO<sub>3</sub> solution (25 mL) was then added, and the aqueous layer was extracted with ether (3 × 30 mL). The combined organic layers were washed with brine, dried (Na<sub>2</sub>SO<sub>4</sub>), filtered, and concentrated. The crude material was purified by chromatography (10:1 hexanes:EtOAc) to give 2.5 g (98%) of a colorless oil. <sup>1</sup>H NMR (400 MHz, CDCl<sub>3</sub>) *Mixture of THP ether diastereomers*: δ 1.00 (dt, *J* = 1.4, 7.5 Hz, 3H), 1.50–2.10 (m, 11H), 3.5 (m, 2H), 3.82 (m, 4H), 4.31 (m, 2H), 4.52 (dd, *J* = 4.6, 4.2 Hz, 2H), 5.31 (m, 1H), 5.64 (m, 1H), 6.88 (dd, *J* = 0.4, 8.5 Hz, 2H), 7.27 (m, 2H); <sup>13</sup>C NMR (100.6 MHz, CDCl<sub>3</sub>) *Mixture of THP ether diastereomers; all peaks listed*: δ 14.8, 20.0, 20.1, 21.4, 21.5, 25.9, 25.9, 31.1, 31.2, 36.3, 36.4, 55.7, 62.6, 62.7, 64.5, 64.5, 69.8, 70.0, 71.1, 71.7, 99.1, 99.5, 114.1, 114.1, 129.7,

129.8, 130.3, 130.3, 131.4, 131.4, 135.6, 135.7, 159.4, 159.4; IR (film) 1613, 1512  $\text{cm}^{-1}$ ; MS (CI)  $m/z$  352 ( $\text{M}^+ + \text{NH}_4$ ), 335, 121; HRMS calcd for  $\text{C}_{20}\text{H}_{34}\text{NO}_4$  ( $\text{M}^+ + \text{NH}_4$ ) 352.2488, found 352.2499.

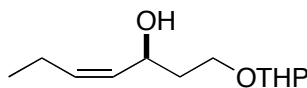

**(3*S,Z*)-1-(Tetrahydro-2*H*-pyran-2'-yloxy)hept-4-en-3-ol (3).** To a mixture of **A5** (1.44 g, 4.30 mmol) in  $\text{CH}_2\text{Cl}_2$ /water (60 mL: 3mL) at room temperature was added DDQ (1.19 g, 5.25 mmol). The reaction mixture was stirred vigorously for 1.5 h, and then a saturated aqueous solution of  $\text{NaHCO}_3$  (50 mL) was added. The layers were separated and the aqueous layer was extracted with  $\text{CH}_2\text{Cl}_2$  ( $3 \times 50$  mL). The combined organic layers were washed with brine ( $1 \times 50$  mL), dried ( $\text{Na}_2\text{SO}_4$ ), filtered, and concentrated. Chromatography (5:1 to 2:1 hexanes:EtOAc) gave 0.73 g (79%) of a colorless oil.  $^1\text{H}$  NMR (500 MHz,  $\text{CDCl}_3$ ) *Mixture of THP ether diastereomers*:  $\delta$  1.01 (dt,  $J = 1.7, 7.5$  Hz, 3H), 1.56-1.64 (complex, 4H), 1.74-1.95 (complex, 4H), 2.11 (m, 2H), 2.67 (br, s, 1H), 3.55 (m, 2H), 3.94 (m, 2H), 4.61 (m, 1H), 4.69 (m, 1H), 5.45 (m, 2H);  $^{13}\text{C}$  NMR (100.6 MHz,  $\text{CDCl}_3$ ) *Mixture of THP ether diastereomers; all peaks listed*:  $\delta$  14.8, 19.8, 20.0, 21.4, 25.7, 30.9, 31.1, 37.4, 37.4, 62.6, 63.0, 65.8, 66.0, 66.8, 67.4, 99.3, 99.5, 131.9, 131.9, 133.8, 133.9; IR (film) 3431  $\text{cm}^{-1}$ ; MS (CI)  $m/z$  215 ( $\text{M}^+ + \text{H}$ ), 197, 85; HRMS calcd for  $\text{C}_{12}\text{H}_{23}\text{O}_3$  ( $\text{M}^+ + \text{H}$ ) 215.1647, found 215.1639.

Ether-substituted allylic alcohols were prepared via a zirconium-mediated coupling of aldehyde **7** with benzyloxy or *tert*-butyldiphenylsilyloxy alkynes. The racemic allylic alcohol **8** was subjected to a kinetic resolution under Sharpless conditions<sup>10</sup> to furnish the enantioenriched allylic alcohol (*R*)-**8** in 42% yield and  $\geq 99\%$  er as determined by proton NMR of the Mosher's ester derivative<sup>11</sup> All other ether-substituted allylic alcohols were prepared and used in racemic form.

**Scheme B. Synthesis of ether-substituted allylic alcohols.***Preparation of the aldehyde coupling component:*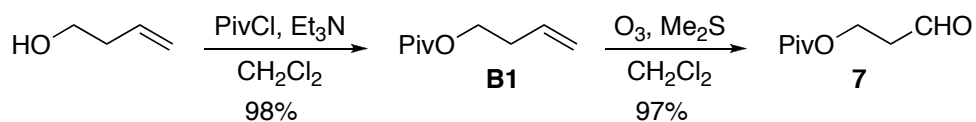*Synthesis of racemic allylic alcohols:*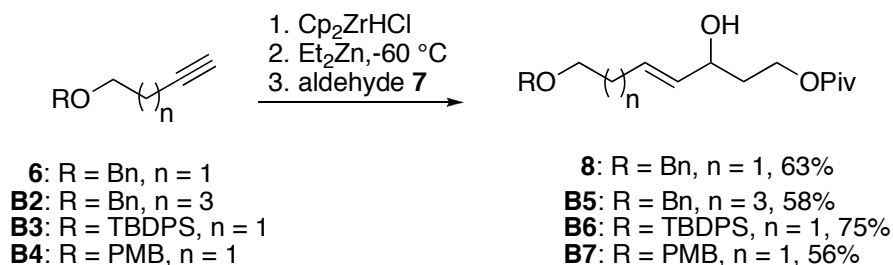*Generation of enantiopure allylic alcohol:*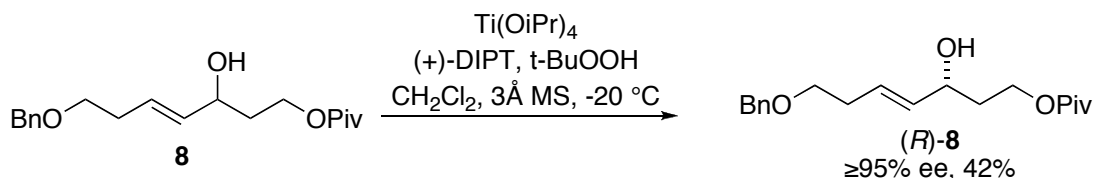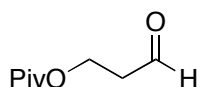

**3-Oxopropyl pivalate (7).** Ozone was bubbled through a solution of 3-butenyl pivalate (**B1**)<sup>4</sup> (12.87 g, 82.37 mmol) in CH<sub>2</sub>Cl<sub>2</sub> (150 mL) at  $-78^\circ\text{C}$  until a persistent blue color resulted (ca. 2 h). The reaction was quenched with dimethyl sulfide (65 mL) and allowed to warm to room temperature with stirring for 16 h. The reaction mixture was concentrated under reduced pressure and the resulting residue was dissolved in ether and filtered through a pad of silica gel. The filtrate was concentrated to afford 12.70 g (97%) of the title compound as a colorless oil. <sup>1</sup>H NMR (500 MHz, CDCl<sub>3</sub>)  $\delta$  1.21 (s, 9H), 2.78 (td,  $J$  = 6.1, 1.5, Hz, 2H), 4.42 (t,  $J$  = 6.1 Hz, 2H), 9.81 (t,  $J$  = 1.5 Hz, 1H); <sup>13</sup>C NMR

(125.8 MHz, CDCl<sub>3</sub>)  $\delta$  27.0, 38.6, 57.9, 178.2, 199.3; IR (neat) 1728, 1483 cm<sup>-1</sup>; MS (CI)  $m/z$  159 (M<sup>+</sup> + H), 85, 57; HRMS calcd for C<sub>8</sub>H<sub>15</sub>O<sub>3</sub> (M<sup>+</sup> + H) 159.1021, found 159.1020.

**General procedure for the synthesis of ether-substituted allylic alcohols.**

According to the procedure of Wipf and Xu,<sup>12</sup> bis(cyclopentadienyl)zirconium chloride hydride (Schwartz's reagent) (5.0 g, 19.4 mmol) was added to a solution of the alkyne (16.2 mmol) in dry CH<sub>2</sub>Cl<sub>2</sub> (60 mL) at 0 °C. The resulting mixture was then warmed to room temperature and stirred until a homogeneous solution formed. The resulting yellow solution was stirred at room temperature for an additional 20 min, and then cooled to -60 °C. Diethylzinc (1.0 M in hexanes, 19.4 mmol) was then added dropwise over 45 min at -60 °C. After the addition was complete, the resulting solution was stirred at -60 °C for an additional 10 min. The reaction flask was immersed in an ice bath, and a solution of aldehyde **7** (3.1 g, 19.4 mmol) in CH<sub>2</sub>Cl<sub>2</sub> (10 mL) was added dropwise over 45 min. The resulting solution was stirred at 0 °C for an additional 6 h. The light-yellow reaction mixture was then slowly poured into an ice-cold solution of aq 5% NaHCO<sub>3</sub> (200 mL) and stirring was continued at room temperature until gas evolution ceased. The resulting mixture was extracted with Et<sub>2</sub>O (3 × 200 mL) and the combined organic extracts were washed with brine (1 × 200 mL), dried (Na<sub>2</sub>SO<sub>4</sub>), and filtered through a pad of Florisil<sup>®</sup>. The filtrate was concentrated, and the resulting residue was purified by chromatography to afford the allylic alcohol.

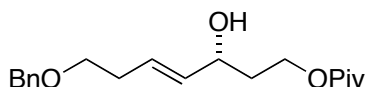

**(3*R*,*E*)-7-Benzyloxy-3-hydroxyhept-4-enyl pivalate (**8**).** The racemic allylic alcohol **8** was prepared according to the general procedure from alkyne **6**<sup>5</sup> (3.09 g, 19.3 mmol) and aldehyde **7** (3.66 g, 23.2 mmol). Chromatography (5:1 hexanes:EtOAc) gave 3.9 g (63%) of a colorless oil. The racemic material was subjected to a kinetic resolution using the procedure of Sharpless.<sup>10</sup> Accordingly, a mixture of the allylic alcohol *rac*-**8** (4.06 g, 12.7 mmol), (+)-diisopropyl tartrate (0.89 g, 3.8 mmol), and 3Å powdered

molecular sieves (1.0 g) in  $\text{CH}_2\text{Cl}_2$  (50.0 mL) was cooled to  $-20\text{ }^\circ\text{C}$  and then treated with  $\text{Ti}(\text{O-}i\text{-Pr})_4$  (0.72 g, 2.5 mmol). After stirring for 30 min at  $-20\text{ }^\circ\text{C}$ , a solution of TBHP (5.0 M, 1.9 mL) was added to the reaction mixture and stirring at  $-20\text{ }^\circ\text{C}$  was continued for 12–14 h. After  $>50\%$  conversion was obtained (monitored by  $^1\text{H}$  NMR), the reaction was quenched with an aqueous solution (60 mL) of  $\text{FeSO}_4$  (1.57 g) and citric acid (0.53 g) and stirred at room temperature for 1 h. The phases were separated and the aqueous phase was extracted with  $\text{CH}_2\text{Cl}_2$  ( $2 \times 75\text{ mL}$ ). The combined organic layers were concentrated to approximately 50 mL and then stirred for 30 min with 30% NaOH (100 mL). The phases were separated and extracted as before, and the combined organic layers were washed with brine, dried ( $\text{Na}_2\text{SO}_4$ ), filtered, and concentrated. The crude product was purified by chromatography (5:1 hexanes:EtOAc) to afford 1.72 g (42%) of the allylic alcohol (*R*)-**8** in  $\geq 97\%$  er (determined by  $^1\text{H}$  NMR of the (–)-MTPA chloride-derived ester.)<sup>10</sup>  $[\alpha]_{\text{D}} -3.18$  (*c* 0.98,  $\text{CHCl}_3$ ).  $^1\text{H}$  NMR (400 MHz,  $\text{CDCl}_3$ )  $\delta$  1.22 (s, 9H), 1.81 (q,  $J = 6.3\text{ Hz}$ , 2H), 2.36 (q,  $J = 6.6\text{ Hz}$ , 2H), 3.52 (t,  $J = 6.7\text{ Hz}$ , 2H), 4.13 (m, 2H), 4.26 (dt,  $J = 11.2, 6.6\text{ Hz}$ , 1H), 4.52 (s, 2H), 5.57 (dd,  $J = 15.5, 6.7\text{ Hz}$ , 1H), 5.70 (dt,  $J = 15.5, 6.6\text{ Hz}$ , 1H), 7.32 (m, 5H);  $^{13}\text{C}$  NMR (100.6 MHz,  $\text{CDCl}_3$ )  $\delta$  27.6, 33.0, 36.6, 39.1, 61.7, 70.0, 70.1, 73.3, 128.0, 128.1, 128.8, 128.8, 134.5, 138.7, 179.2; IR (film) 3434, 1724  $\text{cm}^{-1}$ ; MS (CI)  $m/z$  338 ( $\text{M}^+ + \text{NH}_4$ ), 320 ( $\text{M}^+$ ), 108, 91; HRMS calcd for  $\text{C}_{19}\text{H}_{32}\text{NO}_4$  ( $\text{M}^+ + \text{NH}_4$ ) 338.2331, found 338.2326.

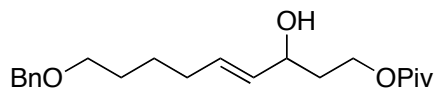

**(±)-(E)-9-(Benzyloxy)-3-hydroxynon-4-enyl pivalate (B5).** Prepared according to the general procedure from 1-benzyloxy-5-hexyne (**B2**)<sup>13</sup> (3.10 g, 16.2 mmol) and aldehyde **7** (3.10 g, 19.4 mmol). The crude product was purified by chromatography (5:1 hexanes:EtOAc) to give 3.30 g (58%) of a colorless oil.  $^1\text{H}$  NMR (400 MHz,  $\text{CDCl}_3$ )  $\delta$  1.22 (s, 9H), 1.48 (m, 2H), 1.64 (m, 2H), 1.83 (m, 2H), 2.01 (br, s, 1H), 2.07 (q,  $J = 7.0\text{ Hz}$ , 2H), 3.48 (t,  $J = 6.4\text{ Hz}$ , 2H), 4.15 (m, 2H), 4.27 (m, 1H), 4.52 (s, 2H), 5.49 (dd,  $J = 6.8, 15.4\text{ Hz}$ , 1H), 5.68 (td,  $J = 6.6, 15.3\text{ Hz}$ , 1H), 7.31 (m, 5H);  $^{13}\text{C}$  NMR (100.6 MHz,

CDCl<sub>3</sub>)  $\delta$  26.1, 27.6, 29.7, 32.4, 36.7, 39.1, 61.8, 70.3, 70.6, 73.3, 127.9, 128.0, 128.8, 132.5, 132.7, 139.0, 179.2; IR (film) 3442, 1726, 1478, 1450 cm<sup>-1</sup>; MS (FAB+)  $m/z$  349 (M<sup>+</sup> + H), 331, 229, 137; HRMS calcd for C<sub>21</sub>H<sub>36</sub>N<sub>0</sub>O<sub>4</sub> (M<sup>+</sup> + NH<sub>4</sub>) 366.2644, found 366.2634.

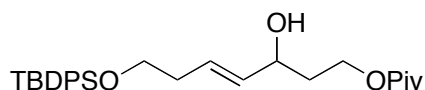

**(±)-(E)-7-(tert-Butyldiphenylsilyloxy)-3-hydroxyhept-4-enyl pivalate (B6).**

Prepared according to the general procedure from alkyne **B3**<sup>7</sup> (5.00 g, 16.2 mmol) and aldehyde **7** (3.34 g, 21.1 mmol). The crude product was purified by chromatography (6:1 hexanes:EtOAc) to give 5.71 g (75%) of a colorless oil. <sup>1</sup>H NMR (400 MHz, CDCl<sub>3</sub>)  $\delta$  1.07 (s, 10H), 1.22 (s, 9H), 1.83 (q,  $J$  = 6.3 Hz, 2H), 2.31 (q,  $J$  = 6.6 Hz, 2H), 3.73 (t,  $J$  = 6.6 Hz, 2H), 4.14 (m, 2H), 4.28 (td,  $J$  = 6.6, 11.2 Hz, 1H), 5.54 (dd,  $J$  = 6.7, 15.4 Hz, 1H), 5.69 (td,  $J$  = 6.7, 15.5 Hz, 1H), 7.44 (m, 6H), 7.68 (m, 4H); <sup>13</sup>C NMR (100.6 MHz, CDCl<sub>3</sub>)  $\delta$  19.6, 27.2, 27.6, 36.0, 36.6, 39.2, 61.7, 63.8, 70.2, 128.0, 129.2, 130.0, 134.3, 134.4, 136.0, 179.2; IR (film) 3466, 1728, 1710 cm<sup>-1</sup>; MS (FAB+)  $m/z$  486 (M<sup>+</sup> + H), 307, 154; HRMS calcd for C<sub>28</sub>H<sub>44</sub>N<sub>0</sub>O<sub>4</sub>Si (M<sup>+</sup> + NH<sub>4</sub>) 486.3040, found 486.3034.

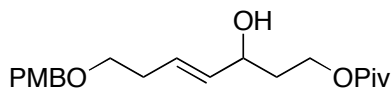

**(±)-(E)-3-Hydroxy-7-(4-methoxybenzyloxy)hept-4-enyl pivalate (B7).**

Prepared according to the general procedure from alkyne **B4** (2.82 g, 16.17 mmol) and aldehyde **7** (3.60 g, 22.64 mmol). The crude product was purified by chromatography (5:1 to 1:1 hexanes:EtOAc) to give 3.2 g (56%) of a colorless oil. <sup>1</sup>H NMR (400 MHz, CDCl<sub>3</sub>)  $\delta$  1.20 (s, 9H), 1.84 (q,  $J$  = 6.3 Hz, 2H), 2.35 (q,  $J$  = 6.7 Hz, 2H), 3.49 (t,  $J$  = 6.8 Hz, 2H), 3.82 (s, 3H), 4.13 (m, 1H), 4.27 (m, 1H), 4.45 (s, 2H), 5.58 (dd,  $J$  = 15.5, 6.6 Hz, 1H),

5.70 (dt,  $J = 15.5, 6.7$  Hz, 1H), 6.89 (d,  $J = 8.6$  Hz, 2H), 7.27 (d,  $J = 8.7$  Hz, 2H);  $^{13}\text{C}$  NMR (100.6 MHz,  $\text{CDCl}_3$ )  $\delta$  27.2, 32.6, 36.2, 38.7, 55.3, 61.3, 69.3, 69.7, 72.6, 113.8, 128.6, 129.3, 130.4, 134.0, 159.2, 178.8; IR (film) 3410, 1680, 1570, 1480  $\text{cm}^{-1}$ ; MS (ES+)  $m/z$  373 ( $\text{M}^+ + \text{NH}_4$ ), 335, 319; HRMS calcd for  $\text{C}_{20}\text{H}_{34}\text{NO}_5$  ( $\text{M}^+ + \text{NH}_4$ ) 368.2437, found 368.2416.

**Scheme C. Synthesis of disilanyl ethers.**

(a) Synthesis of disilanylether **4**:

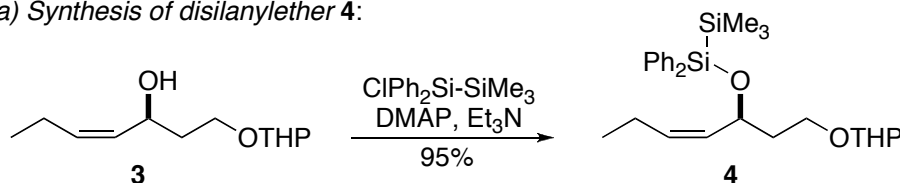

(b) Synthesis of ether-substituted disilanylethers **C1–C4**:

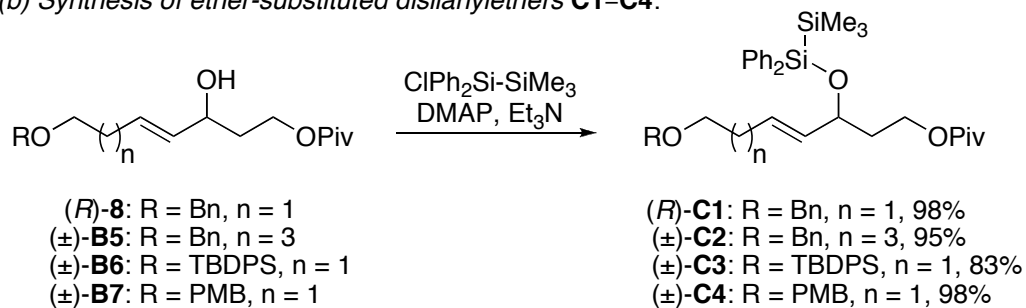

**General procedure for the preparation of disilanyl ethers.** To a mixture of the allylic alcohol (1.0 equiv), triethylamine (1.5 equiv), and a spatula tip of DMAP in THF was added a solution of 1-chloro-2,2,2-trimethyl-1,1-diphenyl disilane<sup>2</sup> (1.5 equiv) in THF at 0 °C. The reaction mixture was allowed to warm to room temperature and stirred for 16 h. Upon completion of the reaction, saturated aq NH<sub>4</sub>Cl was added and the layers were separated. The aqueous layer was extracted with ether (3 × 60 mL) and the combined organic extracts were washed with brine, dried (Na<sub>2</sub>SO<sub>4</sub>), filtered, and concentrated. The crude material was purified by chromatography to afford the product disilanylether.

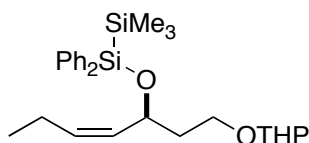

**(3*S,Z*)-Tetrahydropyran-2-yloxy-3-(2',2',2'-trimethyl-1',1'-diphenyl-disilyloxy)hept-4-ene (4).** Prepared according to the general procedure for the preparation of disilanyl ethers from allylic alcohol **3** (0.72 g, 3.36 mmol). The crude product was purified by chromatography (25:1 hexanes:EtOAc) to give 1.50 g (95%) of a colorless oil. <sup>1</sup>H NMR (400 MHz, CDCl<sub>3</sub>) *Mixture of THP ether diastereomers*: δ 0.21 (s, 9H), 0.81 (td, *J* = 6.9, 10.4 Hz, 3H), 1.47-2.03 (m, 10H), 3.46 (m, 2H), 3.82 (m, 2H), 4.48 (td, *J* = 3.7, 44.4 Hz, 1H), 4.72 (m, 1H), 5.28 (qd, *J* = 11.0, 6.9 Hz, 1H), 5.41 (m, 1H), 7.39 (m, 6H), 7.59 (m, 4H); <sup>13</sup>C NMR (100.6 MHz, CDCl<sub>3</sub>) *Mixture of THP ether diastereomers; all peaks listed*: δ -0.8, 14.4, 14.6, 19.8, 20.0, 21.3, 23.1, 25.9, 31.1, 32.0, 38.9, 39.1, 62.4, 62.6, 64.2, 64.3, 67.8, 68.1, 98.9, 99.1, 128.1, 129.7, 132.3, 132.4, 132.7, 132.9, 135.3, 135.4, 137.6; IR (film) 2947, 1428 cm<sup>-1</sup>; MS (EI) *m/z* 311, 255, 85; HRMS calcd for C<sub>27</sub>H<sub>44</sub>Si<sub>2</sub>O<sub>3</sub>N 486.2860 (M<sup>+</sup> + NH<sub>4</sub>), found 486.2877.

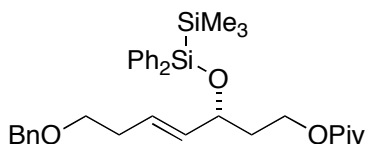

**(3*R*,*E*)-7-Benzyloxy-3-(2',2',2'-trimethyl-1',1'-diphenyldisilyloxy)hept-4-enyl pivalate (C1).** Prepared according to the general procedure for the preparation of disilanyl ethers from allylic alcohol (*R*)-**8** (4.10 g, 12.8 mmol). Chromatography (25:1 hexanes:EtOAc) afforded 7.33 g (ca. 100%) of a colorless oil.  $[\alpha]_D^{+12.4}$  (*c* 0.98, CHCl<sub>3</sub>). <sup>1</sup>H NMR (500 MHz, CDCl<sub>3</sub>)  $\delta$  0.19 (s, 9H), 1.14 (s, 9H), 1.78 (m, 1H), 1.93 (m, 1H), 2.24 (q, *J* = 6.7 Hz, 2H), 3.35 (m, 2H), 4.10 (t, *J* = 6.5 Hz, 2H), 4.30 (q, *J* = 6.5 Hz, 1H), 4.48, (s, 2H), 5.41 (dt, *J* = 15.4, 6.4 Hz, 1H), 5.48 (dd, *J* = 15.5, 7.0 Hz, 1H), 7.30-7.55 (m, 15H); <sup>13</sup>C (100.6 MHz, CDCl<sub>3</sub>)  $\delta$  -0.85, 27.6, 33.0, 37.6, 39.0, 61.5, 70.0, 72.6, 73.3, 128.0, 128.1, 128.2, 128.4, 128.8, 129.8, 134.6, 135.3, 135.3, 137.3, 138.8, 178.8; IR (film) 1727 cm<sup>-1</sup>; MS (FAB+) *m/z* 581.3, 255.1, 154.1; HRMS calcd for C<sub>34</sub>H<sub>50</sub>NO<sub>4</sub>Si<sub>2</sub> (M<sup>+</sup> + NH<sub>4</sub>) 592.3278, found 592.3257.

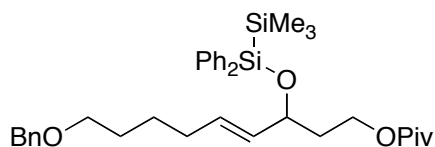

**(±)-(E)-9-(Benzyloxy)-3-(2',2',2'-trimethyl-1',1'-diphenyldisilyloxy)non-4-enyl pivalate (C2).** Prepared according to the general procedure for the preparation of disilanyl ethers from allylic alcohol **B5** (2.29 g, 3.42 mmol). The crude product was purified by chromatography (25:1 hexanes:EtOAc) to give 3.77 g (95%) of a colorless oil. <sup>1</sup>H NMR (400 MHz, CDCl<sub>3</sub>)  $\delta$  0.20 (s, 9H), 1.15 (s, 9H), 1.34 (m, 2H), 1.56 (m, 2H), 1.78 (m, 1H), 1.94 (m, 3H), 3.45 (t, *J* = 6.5 Hz, 2H), 4.09 (t, *J* = 6.4 Hz, 2H), 4.27 (q, *J* = 6.1 Hz, 1H), 4.52 (s, 2H), 5.39 (m, 2H), 7.36 (m, 10H), 7.55 (m, 5H); <sup>13</sup>C NMR (100.6 MHz, CDCl<sub>3</sub>)  $\delta$  -0.8, 26.0, 27.6, 29.7, 32.3, 37.7, 39.0, 61.6, 70.6, 72.7, 73.3, 127.9, 128.0, 128.1, 128.8, 132.2, 132.8, 135.3, 135.3, 137.4, 139.1, 178.8; IR (film) 1731, 1481

$\text{cm}^{-1}$ ; MS (FAB+)  $m/z$  620 ( $\text{M}^+ + \text{NH}_4$ ), 370, 255; HRMS calcd for  $\text{C}_{36}\text{H}_{54}\text{NO}_4\text{Si}_2$  ( $\text{M}^+ + \text{NH}_4$ ) 620.3591, found 620.3617.

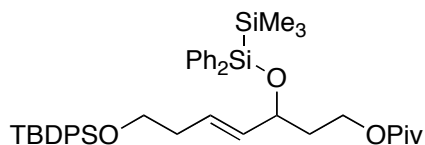

**(±)-(E)-7-(tert-Butyldiphenylsilyloxy)-3-(2',2',2'-trimethyl-1,1-diphenyl-disilyloxy)hept-4-enyl pivalate (C3).** Prepared according to the general procedure for the preparation of disilanyl ethers from allylic alcohol **B6** (4.0 g, 5.07 mmol). Chromatography (20:1 hexanes:EtOAc) gave 5.13 g (83%) of a colorless oil.  $^1\text{H}$  NMR (400 MHz,  $\text{CDCl}_3$ )  $\delta$  0.10 (s, 9H), 1.05 (s, 10H), 1.14 (s, 9H), 1.77 (m, 1H), 1.91 (m, 1H), 2.17 (q,  $J = 6.6$  Hz, 2H), 3.51 (q,  $J = 7.0$  Hz, 2H), 4.09 (t,  $J = 6.4$  Hz, 2H), 4.26 (q,  $J = 6.4$  Hz, 1H), 5.42 (m, 2H), 7.33–7.67 (m, 20H);  $^{13}\text{C}$  NMR (125.8 MHz,  $\text{CDCl}_3$ )  $\delta$  -1.3, 15.2, 19.1, 26.7, 27.1, 35.4, 37.2, 38.5, 61.0, 63.3, 65.8, 72.1, 127.5, 127.6, 128.0, 129.3, 129.5, 133.8, 134.0, 134.8, 135.5, 136.8, 178.3; IR (film) 1730, 1427  $\text{cm}^{-1}$ ; HRMS calcd for  $\text{C}_{43}\text{H}_{62}\text{NO}_4\text{Si}_3$  ( $\text{M}^+ + \text{NH}_4$ ) 740.3987, found 740.4001.

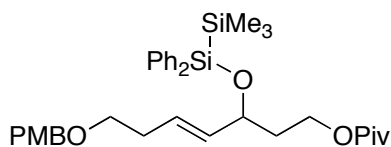

**(±)-(E)-7-(4'-Methoxybenzyloxy)-3-(2',2',2'-trimethyl-1,1-diphenyldisilyloxy)hept-4-enyl pivalate (C4).** Prepared according to the general procedure for the preparation of disilanyl ethers from allylic alcohol **B7** (2.32 g, 6.62 mmol). The crude product was purified by chromatography (25:1 hexanes:EtOAc) to give 3.94 g (98%) of a colorless oil.  $^1\text{H}$  NMR (400 MHz,  $\text{CDCl}_3$ )  $\delta$  0.19 (s, 9H), 1.14 (s, 9H), 1.29 (t,  $J = 7.0$  Hz, 2H), 1.78 (m, 1H), 1.92 (m, 1H), 2.22 (q,  $J = 6.8$  Hz, 2H), 3.34 (m, 2H), 3.32 (m, 2H), 3.83 (s, 3H), 4.09 (t,  $J = 6.4$  Hz, 2H), 4.28 (q,  $J = 6.4$  Hz, 1H), 4.41 (s, 2H), 5.41 (dt,  $J = 15.5, 6.2$  Hz, 1H), 5.47 (dd,  $J = 15.5, 6.9$  Hz, 1H), 6.89 (d,  $J = 8.7$  Hz, 2H), 7.26 (d,  $J =$

8.6 Hz, 2H), 7.40–7.56 (m, 10 H);  $^{13}\text{C}$  NMR (100.6 MHz,  $\text{CDCl}_3$ )  $\delta$  -1.2, 27.2, 32.6, 37.2, 38.6, 55.3, 61.1, 69.4, 72.2, 72.6, 113.8, 127.76, 128.0, 128.1, 129.3, 129.4, 129.5, 134.0, 134.9, 159.2, 178.4; IR (film) 1710, 1440  $\text{cm}^{-1}$ ; MS (ES+)  $m/z$  622 ( $\text{M}^+ + \text{NH}_4$ ), 389, 374, 373; HRMS calcd for  $\text{C}_{35}\text{H}_{52}\text{NO}_5\text{Si}_2$  ( $\text{M}^+ + \text{NH}_4$ ) 622.3384, found 622.3376.

### Preparation of Chiral Allylsilanes

#### Scheme D. Synthesis of chiral allylsilanes.

##### (a) Synthesis of ethyl-substituted allylsilane **5b**:

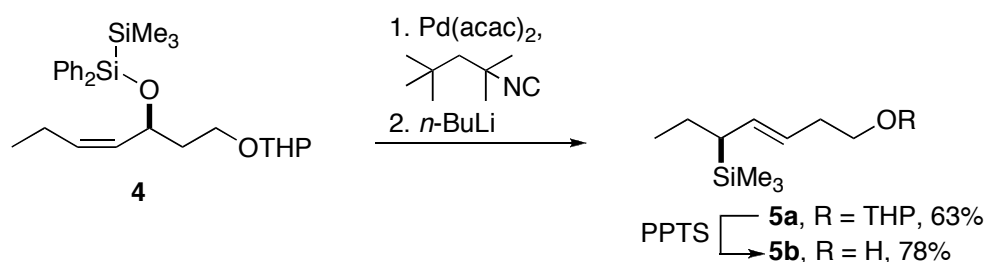

##### (b) Synthesis of ether-substituted allylsilanes **9**, **D1**, **D2**:

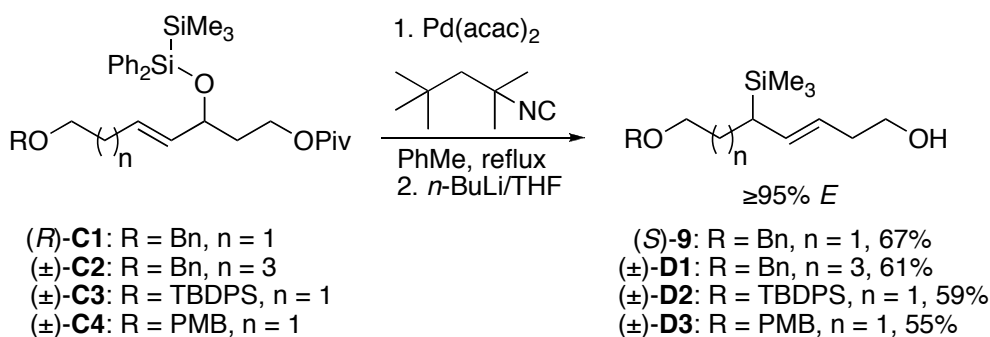

#### General procedure for the conversion of disilanyl ethers to chiral allylsilanes.

According to the procedure of Ito,<sup>14</sup> a mixture of 1,1,3,3-tetramethylbutyl isocyanide (0.41 equiv) and  $\text{Pd}(\text{acac})_2$  (0.10 equiv) in toluene was stirred at room temperature under Ar for 5 min, resulting in a red-brown solution. A solution of the disilanyl ether (1.0 equiv) in toluene (ca. 5 mL) was then added and the resulting mixture was heated at reflux for 3.5–6 h. After cooling to room temperature, the reaction mixture was filtered through Florisil<sup>®</sup> and concentrated under reduced pressure. The residue obtained was

dissolved in THF and cooled to 0 °C. The resulting solution was charged with *n*-BuLi (2 equiv for pivalate esters; 1.5 equiv for THP ethers), and stirred at 0 °C for 30 min. The reaction was quenched with water (20 mL) and the layers were separated. The aqueous layer was extracted with ether (3 × 30 mL), and the combined organic extracts were washed with brine, dried (Na<sub>2</sub>SO<sub>4</sub>), filtered, and concentrated. Chromatography of the crude material afforded the *E*-allylsilane product.

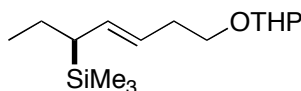

**(5*S*,*E*)-1-(Tetrahydropyran-2'-yloxy)-5-trimethylsilylhept-3-ene (5a).** Prepared according to the general procedure from disilanyl ether **4** (2.00 g, 4.27 mmol). The crude material was purified by chromatography (30:1 hexanes:EtOAc) to give 0.88 g (76%) of an orange-brown oil. <sup>1</sup>H NMR (500 MHz, CDCl<sub>3</sub>) *Mixture of THP ether diastereomers*: δ −0.03 (s, 9H), 0.91 (t, *J* = 6.9 Hz, 3H), 1.32 (m, 2H), 1.58 (m, 5H), 1.72 (m, 1H), 1.85 (m, 1H), 2.32 (q, *J* = 6.7 Hz, 2H), 3.42 (m, 1H), 3.51 (m, 1H), 3.75 (td, *J* = 7.1, 10.8 Hz, 1H), 3.90 (m, 1H), 4.62 (s, 1H), 5.27 (m, 2H); <sup>13</sup>C NMR (125.8 MHz, CDCl<sub>3</sub>) *Mixture of THP ether diastereomers; all peaks listed*: δ −3.22, 14.1, 19.4, 19.5, 21.8, 21.9, 25.1, 30.6, 33.4, 35.3, 62.0, 62.1, 67.7, 67.8, 98.5, 98.6, 124.1, 124.2, 133.5; IR (film) 2956, 1456 cm<sup>−1</sup>; MS (CI) *m/z* 271 (M<sup>+</sup> + H), 197, 102; HRMS calcd for C<sub>15</sub>H<sub>34</sub>NO<sub>2</sub>Si (M<sup>+</sup> + NH<sub>4</sub>) 288.2359, found 288.2362.

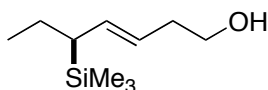

**(5*S*, *E*)-5-Trimethylsilylhept-3-en-1-ol (5b).** A solution of **5a** (0.55 g, 2.02 mmol) and PPTS (0.10 g, 0.41 mmol) in EtOH (15 mL) was stirred at 55 °C for 4.5 h. After cooling to room temperature, water (5.0 mL) was added to the reaction mixture,

which was extracted with ether (3 × 30 mL). The combined organic extracts were washed with brine, dried (Na<sub>2</sub>SO<sub>4</sub>), filtered, and concentrated. Chromatography (20:1 to 10:1 hexanes:EtOAc) gave 0.30 g (78%) of a pale yellow oil.  $[\alpha]_D +7.8$  (*c* 0.83, CHCl<sub>3</sub>). <sup>1</sup>H NMR (400 MHz, CDCl<sub>3</sub>)  $\delta$  -0.02 (s, 9H), 0.91 (t, *J* = 6.3 Hz, 3H), 1.30 (m, 2H), 1.52 (m, 2H), 2.30 (q, *J* = 6.6 Hz, 2H), 3.61 (t, *J* = 6.3 Hz, 2H), 5.20 (td, 6.8, 15.2 Hz, 1H), 5.40 (dd, *J* = 7.2, 15.3 Hz, 1H); <sup>13</sup>C NMR (100.6 MHz, CDCl<sub>3</sub>)  $\delta$  -3.2, 14.2, 21.8, 35.5, 36.3, 62.3, 123.4, 135.5; IR (film) 3334, 1451 cm<sup>-1</sup>; MS (CI) *m/z* 187 (M<sup>+</sup> + H), 147, 90; HRMS calcd for C<sub>10</sub>H<sub>26</sub>NOSi (M<sup>+</sup> + NH<sub>4</sub>) 204.1784, found 204.1779.

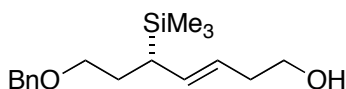

**(5*S*,*E*)-7-Benzyloxy-5-trimethylsilylhept-3-en-1-ol (9).** Prepared according to the general procedure using disilanyl ether (*R*)-**C1** (1.80 g, 3.18 mmol). Chromatography of the crude product (5:1 hexanes:EtOAc) gave 0.62 g (67%) of an orange-brown oil.  $[\alpha]_D +28.4$  (*c* 1.22, CHCl<sub>3</sub>). <sup>1</sup>H NMR (500 MHz, CDCl<sub>3</sub>)  $\delta$  0.01 (s, 9H), 1.53 (br s, 1H), 1.64 (m, 2H), 1.84 (dt, *J* = 10.6, 7.7 Hz, 1H), 2.27 (q, *J* = 6.4 Hz, 2H), 3.44 (m, 1H), 3.54 (m, 1H), 3.59 (t, *J* = 6.3 Hz, 2H), 4.52 (AB q, *J* = 12.0,  $\Delta\nu$  = 31.4 Hz, 2H), 5.22 (dt, *J* = 15.3, 7.0 Hz, 1H), 5.36 (dd, *J* = 15.1, 9.2 Hz, 1H), 7.4 (m, 5H); <sup>13</sup>C NMR (125.8 MHz, CDCl<sub>3</sub>)  $\delta$  -3.4, 28.7, 29.9, 36.2, 62.2, 69.9, 72.8, 123.8, 127.4, 127.6, 128.3, 134.7, 138.5; IR (film) 3399 cm<sup>-1</sup>; MS (FAB +) *m/z* 293 (M<sup>+</sup> + H); HRMS calcd for C<sub>17</sub>H<sub>29</sub>SiO<sub>2</sub> (M<sup>+</sup> + H) 293.1937, found 293.1933.

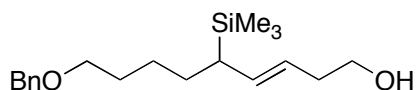

**(±)-(E)-9-Benzyloxy-5-(trimethylsilyl)non-3-en-1-ol (D1).** Prepared according to the general procedure from disilanyl ether **C2** (1.15 g, 1.90 mmol). The crude product was purified by chromatography (6:1 to 3:1 hexanes:EtOAc) to give 0.70 g (61%) of an

orange-brown oil.  $^1\text{H}$  NMR (500 MHz,  $\text{CDCl}_3$ )  $\delta$  -0.01 (s, 9H), 1.34 (m, 2H), 1.50 (m, 4H), 1.66 (m, 1H), 2.30 (q,  $J$  = 6.5 Hz, 2H), 3.48 (m, 2H), 3.61 (t,  $J$  = 6.3 Hz, 2H), 4.52 (s, 2H), 5.21 (td,  $J$  = 7.0, 15.3 Hz, 1H), 5.34 (dd,  $J$  = 9.6, 15.2 Hz, 1H), 7.37 (m, 5H);  $^{13}\text{C}$  NMR (125.8 MHz,  $\text{CDCl}_3$ )  $\delta$  -3.3, 25.8, 28.4, 29.4, 33.2, 36.3, 62.3, 70.3, 72.8, 123.5, 127.4, 127.6, 128.3, 135.4, 138.6; IR (film) 3395, 1454  $\text{cm}^{-1}$ ; MS (FAB+)  $m/z$  321 ( $\text{M}^+$  + H), 136; HRMS calcd for  $\text{C}_{19}\text{H}_{36}\text{NO}_2\text{Si}$  ( $\text{M}^+$  +  $\text{NH}_4$ ) 338.2515, found 338.2506.

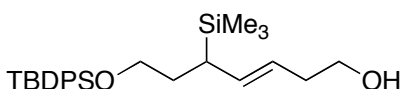

**(±)-(E)-7-(tert-Butyldiphenylsilyloxy)-5-(trimethylsilyl)hept-3-en-1-ol (D2).**

Prepared according to the general procedure from disilanyl ether **C3** (2.50 g, 3.46 mmol). Chromatography (10:1 to 5:1 hexanes:EtOAc) gave 0.90 g (59%) of an orange-brown oil.  $^1\text{H}$  NMR (400 MHz,  $\text{CDCl}_3$ )  $\delta$  -0.01 (s, 9H), 1.08 (s, 9H), 1.52 (m, 1H), 1.63 (td,  $J$  = 11.5, 2.2 Hz, 1H), 1.76 (m, 1H), 2.22 (q,  $J$  = 6.4 Hz, 2H), 3.55 (m, 2H), 3.62 (m, 1H), 3.73 (m, 1H), 5.11 (dt,  $J$  = 15.3, 6.9 Hz, 1H), 5.27 (dd,  $J$  = 15.3, 9.3 Hz, 1H), 7.42 (m, 6H), 7.69 (m, 4H);  $^{13}\text{C}$  NMR (100.6 MHz,  $\text{CDCl}_3$ )  $\delta$  -2.8, 19.6, 27.3, 29.6, 31.9, 36.7, 62.7, 63.7, 124.0, 128.0, 129.9, 134.5, 135.2, 136.0; IR (film) 3356, 1427  $\text{cm}^{-1}$ ; MS (FAB+)  $m/z$  441 ( $\text{M}^+$  + H), 307, 154; HRMS calcd for  $\text{C}_{26}\text{H}_{44}\text{NSi}_2\text{O}_2$  ( $\text{M}^+$  +  $\text{NH}_4$ ) 458.2911, found 458.2914.

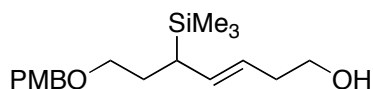

**(±)-(E)-7-(4'-Methoxybenzyloxy)-5-(trimethylsilyl)hept-3-en-1-ol (D3).**

Prepared according to the general procedure for the conversion of disilanyl ethers to chiral allylsilanes from **C4** (2.0 g, 3.31 mmol). The crude product was purified by chromatography (5:1 hexanes:EtOAc) to give 0.59 g (55%) of an orange-brown oil.  $^1\text{H}$

NMR (400 MHz, CDCl<sub>3</sub>)  $\delta$  -0.103 (s, 9H), 1.61 (m, 2H), 1.80 (m, 1H), 2.27 (q,  $J$  = 6.4 Hz, 2H), 3.39 (m, 1H), 3.50 (m, 1H), 3.59 (q,  $J$  = 6.0 Hz, 2H), 4.45 (AB q,  $J$  = 11.5 Hz,  $\Delta\nu$  = 21.8 Hz), 5.20 (dt,  $J$  = 15.3, 6.9 Hz, 1H), 5.35 (dd,  $J$  = 15.3, 9.0 Hz, 1H), 6.89 (d,  $J$  = 8.7 Hz, 2H), 7.28 (d,  $J$  = 8.9 Hz, 2H); <sup>13</sup>C NMR (100.6 MHz, CDCl<sub>3</sub>)  $\delta$  -3.3, 28.8, 30.0, 36.3, 55.3, 62.3, 69.8, 72.6, 113.7, 123.8, 129.3, 130.7, 134.9, 159.1; IR (film) 3400, 1610, 1480 cm<sup>-1</sup>; MS (ES+)  $m/z$  323 (M<sup>+</sup> + H), 233, 215; HRMS calcd for C<sub>18</sub>H<sub>31</sub>O<sub>3</sub>Si (M<sup>+</sup> + H) 323.2043, found 323.2040.

### TiCl<sub>4</sub>-Promoted Cyclization Reactions

#### Scheme E. Synthesis of azido allylsilanes.

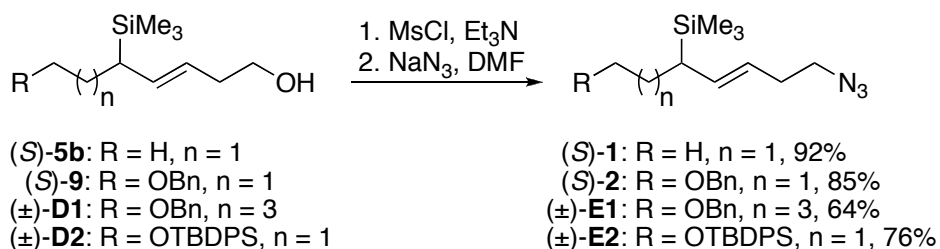

**General procedure for the preparation of azido allylsilanes.** To a solution of the allylsilyl alcohol (1.0 equiv) and triethylamine (1.5 equiv) in CH<sub>2</sub>Cl<sub>2</sub> at 0 °C, was added methanesulfonyl chloride (1.3 equiv). After stirring at 0 °C for 1 h, the reaction was quenched with saturated aqueous NH<sub>4</sub>Cl. The layers were separated and the aqueous layer was extracted with CH<sub>2</sub>Cl<sub>2</sub> (3 × 20 mL). The combined organic layers were dried (Na<sub>2</sub>SO<sub>4</sub>), filtered, and concentrated. The crude product was filtered through a pad of silica gel (5:1 hexanes:EtOAc) and the filtrate was concentrated. The mesylate product thus obtained (1.0 equiv) was dissolved in DMF, and sodium azide (4.0 equiv) was added to the resulting solution. The reaction mixture was heated to 110 °C for 2 h. After cooling to room temperature, the reaction mixture was partitioned between water and ether. The layers were separated and the aqueous layer was extracted with ether. The combined

organic layers were washed with brine, dried (Na<sub>2</sub>SO<sub>4</sub>), filtered, and concentrated. The crude product was purified by chromatography to afford the azido allylsilane.

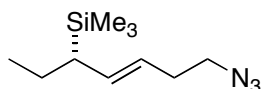

**(5*S*, *E*)-1-Azido-5-trimethylsilylhept-3-ene (1).** Prepared according to the general procedure from alcohol **5b** (0.09 g, 0.48 mmol). The crude product was purified by chromatography (20:1 hexanes:EtOAc) to give 0.093 g (92%) of a colorless oil. [ $\alpha$ ]<sub>D</sub> –2.64 (*c* 1.25, CHCl<sub>3</sub>); <sup>1</sup>H NMR (500 MHz, CDCl<sub>3</sub>)  $\delta$  –0.02 (s, 9H), 0.93 (t, *J* = 7.0 Hz, 3H), 1.35 (m, 2H), 1.55 (m, 1H), 2.34 (q, *J* = 6.9 Hz, 2H), 3.27 (dt, *J* = 2.5, 7.0 Hz, 2H), 5.23 (td, *J* = 6.8, 15.2 Hz, 1H), 5.36 (ddd, *J* = 1.1, 8.1, 15.2 Hz, 1H); <sup>13</sup>C (100.6 MHz, CDCl<sub>3</sub>)  $\delta$  –2.8, 14.7, 22.3, 32.8, 35.9, 52.0, 123.7, 135.6; IR (film) 2094, 1726 cm<sup>–1</sup>; MS (CI) *m/z* 184 [(M<sup>+</sup> + H) – N<sub>2</sub>], 167, 149, 73. It was not possible to obtain a HRMS of the M<sup>+</sup> peak.

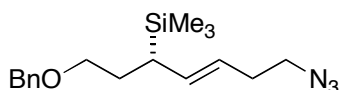

**(5*S*,*E*)-1-Azido-7-benzyloxy-5-trimethylsilylhept-3-ene (2).** Prepared according to the general procedure from alcohol **9** (0.58g, 2.0 mmol). The crude product was purified by chromatography (10:1 hexanes:EtOAc) to give 0.54 g (85%) of a colorless oil. [ $\alpha$ ]<sub>D</sub> +32.4 (*c* 0.21, CHCl<sub>3</sub>). <sup>1</sup>H NMR (400 MHz, CDCl<sub>3</sub>)  $\delta$  0.01 (s, 9H), 1.62 (m, 2H), 1.84 (ddd, *J* = 12.8, 7.4, 2.3 Hz, 1H), 2.31 (qd, *J* = 6.4, 0.9 Hz, 2H), 3.24 (t, *J* = 7.0 Hz, 2H), 3.42 (m, 1H), 3.55 (m, 1H), 4.51 (AB q, *J* = 11.4 Hz,  $\Delta\nu$  = 18.5 Hz), 5.22 (dt, *J* = 15.3, 6.8 Hz, 1H), 5.40 (ddd, *J* = 15.2, 8.1, 1.0 Hz, 1H) 7.4 (m, 5H); <sup>13</sup>C NMR (100.6 MHz, CDCl<sub>3</sub>)  $\delta$  –2.9, 29.2, 30.1, 32.7, 51.4, 70.4, 73.4, 124.0, 127.9, 128.0, 128.8, 134.9, 139.1; IR (film) 2100, 1678 cm<sup>–1</sup>; MS (CI) *m/z* 318 (M<sup>+</sup> + H), 91, 73; HRMS calcd for C<sub>17</sub>H<sub>28</sub>SiN<sub>3</sub>O (M<sup>+</sup> + H) 318.2002, found 318.1984.

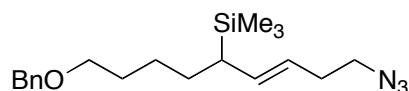

**(±)-(E)-1-Azido-9-benzyloxy-5-trimethylsilyl-3-nonene (E1).** Prepared according to the general procedure from alcohol **D1** (0.23 g, 0.72 mmol). The crude product was purified by chromatography (10:1 hexanes:EtOAc) to give 0.16 g (64%) of a colorless to pale yellow oil.  $^1\text{H}$  NMR (500 MHz,  $\text{CDCl}_3$ )  $\delta$  -0.01 (s, 9H), 1.27 (m, 1H), 1.35 (m, 1H), 1.45-1.58 (m, 4H), 1.65 (m, 1H), 2.32 (dq,  $J$  = 0.9, 7.0 Hz, 2H), 3.26 (m, 2H), 3.48 (t,  $J$  = 6.6 Hz, 2H), 4.52 (s, 2H), 5.23 (td,  $J$  = 6.8, 15.3 Hz, 1H), 5.36 (dd,  $J$  = 5.9, 15.2 Hz, 1H), 7.36 (m, 5H);  $^{13}\text{C}$  NMR (125.8 MHz,  $\text{CDCl}_3$ )  $\delta$  -3.3, 25.9, 28.5, 29.5, 32.3, 33.2, 51.5, 70.4, 72.8, 123.1, 127.4, 127.5, 128.2, 134.3, 135.1, 138.6; IR (film) 2096; MS (FAB+)  $m/z$  318 [ $(\text{M}^+ + \text{H}) - \text{N}_2$ ], 226, 136; HRMS calcd for  $\text{C}_{19}\text{H}_{32}\text{N}_3\text{SiO}$  ( $\text{M}^+ + \text{H}$ ) 346.2315, found 346.2315.

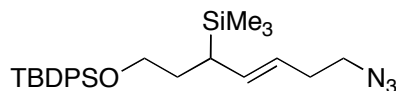

**(±)-(E)-1-Azido-7-(tert-butyldiphenylsilyloxy)-5-trimethylsilylhept-3-en-1-ol (E2).** Prepared according to the general procedure from alcohol **D2** (0.14 g, 0.32 mmol). Chromatography (10:1 hexanes:EtOAc) gave 0.11 g (76%) of a colorless oil.  $^1\text{H}$  NMR (400 MHz,  $\text{CDCl}_3$ )  $\delta$  -0.02 (s, 9H), 1.07 (s, 10H), 1.56 (m, 2H), 1.77 (m, 1H), 2.24 (q,  $J$  = 6.7 Hz, 2H), 3.17 (td,  $J$  = 7.3, 1.6 Hz, 2H), 3.59 (m, 1H), 3.71 (m, 1H), 5.10 (dt,  $J$  = 15.3, 6.8 Hz, 1H), 5.27 (dd,  $J$  = 15.2, 9.1 Hz, 1H), 7.42 (m, 6H), 7.68 (m, 4H);  $^{13}\text{C}$  NMR (100.6 MHz,  $\text{CDCl}_3$ )  $\delta$  -2.9, 19.6, 27.3, 29.6, 31.9, 32.7, 51.8, 63.8, 123.6, 128.0, 129.9, 134.5, 134.9, 136.0; IR (film) 2095, 1429  $\text{cm}^{-1}$ ; MS (FAB+)  $m/z$  466 ( $\text{M}^+ + \text{H}$ ), 438 [ $(\text{M}^+ + \text{H}) - \text{N}_2$ ], 313, 154; HRMS calcd for  $\text{C}_{26}\text{H}_{43}\text{N}_4\text{Si}_2\text{O}$  ( $\text{M}^+ + \text{NH}_4$ ) 483.2975, found 483.2970.

**Scheme F.**  $\text{TiCl}_4$ -promoted cyclizations of allylsilylimines.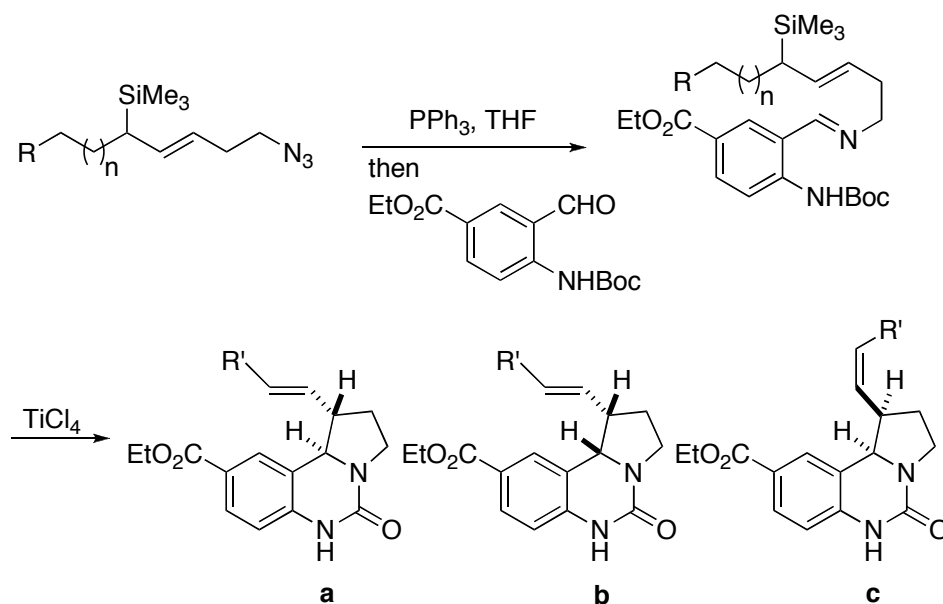

**General procedure for  $\text{TiCl}_4$ -promoted cyclizations of imines.** A solution of the azido allylsilane (1.0 equiv) and triphenylphosphine (1.0 equiv) in THF was stirred at room temperature for 3 h. Ethyl 4-(*N*-*tert*-butoxycarbonyl)amino-3-formylbenzoate<sup>1</sup> (1.0 equiv) was then added, and the reaction mixture was heated at reflux for 20 h. After cooling to room temperature, the reaction mixture was concentrated, triturated with ether, filtered through Florisil<sup>®</sup>, and the filtrate was concentrated. The crude imine thus obtained was dissolved in  $\text{CH}_2\text{Cl}_2$  (to form a ca. 0.01 M solution) and the resulting solution was cooled to 0 °C in an ice bath.  $\text{TiCl}_4$  (5.0 equiv) was then added dropwise to the reaction mixture at 0 °C. Upon complete addition of  $\text{TiCl}_4$ , the ice bath was removed and the reaction mixture was stirred at room temperature for 18 h. The reaction was quenched by the slow addition of a 10% aq NaOH solution, and the mixture was extracted with  $\text{CH}_2\text{Cl}_2$ . The combined organic layers were washed with brine, dried ( $\text{Na}_2\text{SO}_4$ ), filtered, and concentrated. The residue obtained was subjected to chromatography to afford product.  $^1\text{H}$  NMR integration values of the crude reaction mixtures were used for product ratio determinations (normalized to 100%).

*Determination of product stereochemistry and isomer ratios:* Chemical shift and coupling constant values for the doublet corresponding to  $H_A$  ( $H_{10b}$ ) of the 1,10b-cis and 1,10b-trans isomers were used for the assignment of relative stereochemistry of the cyclization reaction products. The assignments of doublets corresponding to the cis and trans isomers were made in analogy to previous work and later confirmed through X-ray crystallography (see below).<sup>1</sup> In most cases, the olefin geometry was readily determined by the corresponding coupling constants for the olefinic hydrogens. However, in some examples the corresponding  $J$  values were obscured in the  $^1H$  NMR for the most minor isomer. In these cases, the olefin geometry was assigned by default.

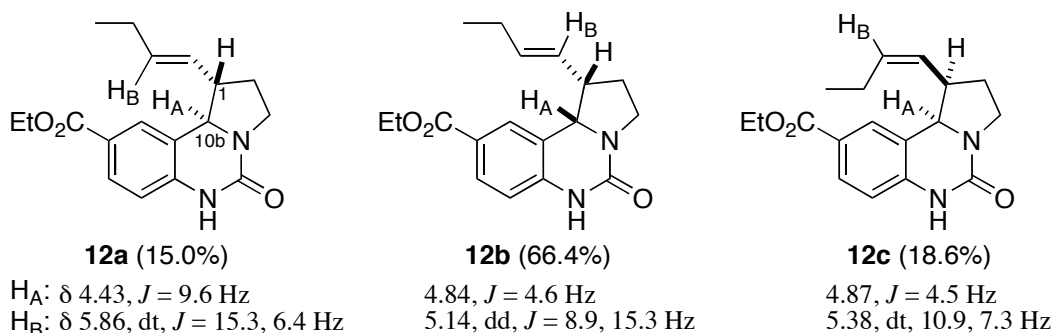

**9-Carboethoxy-1-(but-1'-enyl)-2,3,6,10b-hexahydro-1H-pyrrolo[1,2-c]quinazoline-5-one (12a-c).** Prepared according to the general procedure from azido allylsilane **1** (0.07 g, 0.34 mmol). Chromatography (1:3 hexanes:EtOAc) gave 0.09 g (85%) of a yellow solid isolated as a mixture of isomers. IR (KBr) 1709, 1673, 1617  $cm^{-1}$ ; MS (CI)  $m/z$  315 ( $M^+ + H$ ), 235, 111; HRMS calcd for  $C_{18}H_{23}N_2O_3$  ( $M^+ + H$ ) 315.1709, found 315.1704. Major isomer, **(1S,10bR)-(E)-12b**:  $^1H$  NMR (500 MHz,  $CDCl_3$ )  $\delta$  0.73 (t,  $J$  = 7.4 Hz, 3H), 1.39 (t,  $J$  = 7.1 Hz, 3H), 1.81 (m, 2H), 1.93 (dd,  $J$  = 7.1, 11.8 Hz, 1H), 2.18 (m, 2H), 3.24 (m, 1H), 3.55 (m, 1H), 3.79 (m, 1H), 4.35 (dq,  $J$  = 1.6, 7.0, Hz, 2H), 4.84 (d,  $J$  = 4.6 Hz, 1H), 5.14 (dd,  $J$  = 8.9, 15.3 Hz, 1H), 5.61 (dt,  $J$  = 15.3, 6.9 Hz, 1H), 6.84 (d,  $J$  = 8.4 Hz, 1H), 7.60 (s, 1H), 7.77 (d,  $J$  = 8.3, 1H), 9.61 (s, 1H);  $^{13}C$  NMR (125.8 MHz,  $CDCl_3$ )  $\delta$  13.7, 14.2, 25.5, 30.1, 43.4, 44.7, 60.5, 61.5, 113.7, 118.1, 123.3, 126.1, 128.7, 129.7, 135.4, 141.8, 153.3, 166.1. **(1R,10bS)-(Z)-12c** (diagnostic peaks only):  $^1H$  NMR (500 MHz,  $CDCl_3$ )  $\delta$  4.87 (d,  $J$  = 4.5 Hz, 1H), 5.38 (dt,  $J$  = 10.9, 7.3 Hz, 1H).

**(1S,10bS)-(E)-12a** (diagnostic peaks only):  $^1\text{H}$  NMR (500 MHz,  $\text{CDCl}_3$ )  $\delta$  4.43 (d,  $J$  = 9.6 Hz, 1H), 5.86 (dt,  $J$  = 15.3, 6.4 Hz, 1H).

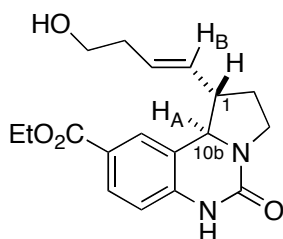

**13a** (87.3%)

$\text{H}_\text{A}$ :  $\delta$  4.45,  $J$  = 9.7 Hz  
 $\text{H}_\text{B}$ :  $\delta$  5.68, dd,  $J$  = 15.1, 8.9 Hz

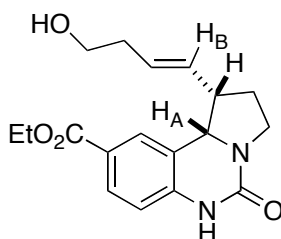

**13b** (9.8%)

$\delta$  4.81,  $J$  = 4.6 Hz  
 $\delta$  5.26, dd,  $J$  = 9.8, 15.4 Hz

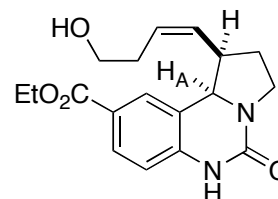

**13c** (2.9%)

$\delta$  4.85 d,  $J$  = 4.5 Hz  
 signal obscured

**9-Carboethoxy-1-(4'-hydroxybut-1'-enyl)-2,3,6,10b-tetrahydro-1H-pyrrolo[1,2-*c*]quinazolin-5-one (13a–c).** Prepared according to the general procedure using azido allylsilane **2** (0.10 g, 0.32 mmol). Chromatography (1:3 hexanes:EtOAc) gave 0.085 g (80%) of a yellow solid as a mixture of isomers. The major isomer **(1S,10bS)-(E)-13a** was isolated by crystallization from the reaction mixture (EtOAc/hexanes, 42%). Major isomer **(1S,10bS)-(E)-13a**: mp 162–164 °C (EtOAc/hexanes);  $[\alpha]_\text{D}$  –22.0 ( $c$  0.45,  $\text{CHCl}_3$ ).  $^1\text{H}$  NMR (500 MHz,  $\text{CDCl}_3$ )  $\delta$  1.38 (t,  $J$  = 7.0 Hz, 3H), 1.90 (quintet,  $J$  = 11.1 Hz, 1H), 2.21 (m, 1H), 2.4 (q,  $J$  = 6.1 Hz, 2H), 2.98 (quintet,  $J$  = 9.5 Hz, 1H), 3.21 (br, s, 1H), 3.66 (m, 2H), 3.83 (t  $J$  = 5.6 Hz, 2H), 4.36 (q,  $J$  = 7.1 Hz, 2H), 4.45 (d,  $J$  = 9.7 Hz, 1H) 5.68 (dd,  $J$  = 15.1, 8.9 Hz, 1H), 5.86 (dt,  $J$  = 14.9, 6.7 Hz, 1H), 6.80 (d,  $J$  = 8.4 Hz, 1H), 7.83 (d,  $J$  = 8.4 Hz, 1H), 8.28 (s, 1H), 8.74 (br, s, 1H);  $^{13}\text{C}$  NMR (125.8 MHz,  $\text{CDCl}_3$ )  $\delta$  14.3, 30.6, 36.2, 43.5, 50.0, 60.1, 61.0, 61.7, 113.5, 121.1, 123.4, 126.7, 130.0, 131.5, 132.8, 141.3, 152.8, 166.7; IR (KBr) 3216, 1709, 1671, 1615  $\text{cm}^{-1}$ ; MS (CI)  $m/z$  331 ( $\text{M}^+$  + H), 232; HRMS calcd for  $\text{C}_{18}\text{H}_{22}\text{N}_2\text{O}_4$  ( $\text{M}^+$  + H) 331.1658, found 331.1662. **(1S,10bR)-(E)-13b** (diagnostic peaks only):  $^1\text{H}$  NMR (500 MHz,  $\text{CDCl}_3$ )  $\delta$  4.81 (d,  $J$  = 4.6 Hz, 1H), 5.26 (dd,  $J$  = 9.8, 15.4 Hz, 1H). **(1R,10bS)-(Z)-13c** (diagnostic peaks only):  $^1\text{H}$  NMR (500 MHz,  $\text{CDCl}_3$ )  $\delta$  4.85 (d,  $J$  = 4.5 Hz, 1H).

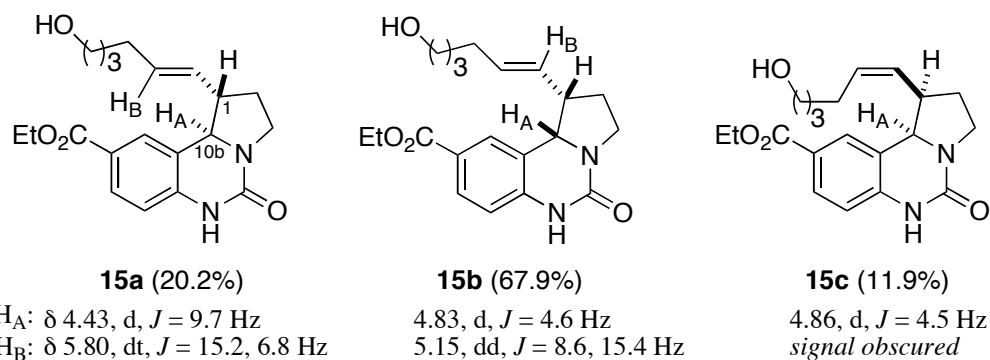

**(±)-9-Carboethoxy-1-(6'-hydroxyhex-1'-enyl)-1,2,3,6,10b-tetrahydro-1H-pyrrolo[1,2-c]quinazoline-5-one (15a–c).** Prepared according to the general procedure from azido allylsilane **E1** (0.30 g, 0.87 mmol). Chromatography (1:3 hexanes:EtOAc) gave 0.23 g (73%) of a yellow foam as a mixture of isomers. IR (film) 3328, 1675, 1614  $\text{cm}^{-1}$ ; MS (CI)  $m/z$  359 ( $M^+ + H$ ), 232; HRMS calcd for  $C_{20}H_{27}N_2O_4$  ( $M^+ + H$ ) 359.1971, found 359.1971. Major isomer **(1S,10bR)-(E)-15b**:  $^1\text{H}$  NMR (400 MHz,  $\text{CDCl}_3$ )  $\delta$  1.39 (t,  $J = 7.1$  Hz, 3H), 1.63 (m, 2H), 1.98 (m, 4H), 2.20 (m, 3H), 3.46 (t,  $J = 6.1$  Hz, 2H), 3.67 (m, 2H), 3.81 (m, 1H), 4.35 (m, 2H), 4.83 (d,  $J = 4.6$  Hz, 1H), 5.15 (dd,  $J = 8.6, 15.4$  Hz, 1H), 5.54 (dt,  $J = 15.3, 6.9$  Hz, 1H), 6.78 (d,  $J = 8.1$  Hz, 1H), 7.70 (s, 1H), 7.82 (dd,  $J = 1.6, 8.4$  Hz, 1H), 9.02 (s, 1H);  $^{13}\text{C}$  NMR (100.6 MHz,  $\text{CDCl}_3$ )  $\delta$  14.8, 25.6, 29.6, 32.1, 32.5, 43.7, 45.3, 61.3, 62.2, 63.1, 114.2, 118.6, 124.0, 128.1, 129.5, 130.3, 133.9, 142.2, 153.6, 166.8. **(1S,10bS)-(E)-15a** (diagnostic peaks only):  $^1\text{H}$  NMR (400 MHz,  $\text{CDCl}_3$ ) 4.43 (d,  $J = 9.7$  Hz, 1H), 5.80 (dt,  $J = 15.2, 6.8$  Hz, 1H). **(1R,10bS)-(Z)-15c**:  $^1\text{H}$  NMR (400 MHz,  $\text{CDCl}_3$ )  $\delta$  4.86 (d,  $J = 4.5$  Hz, 1H).

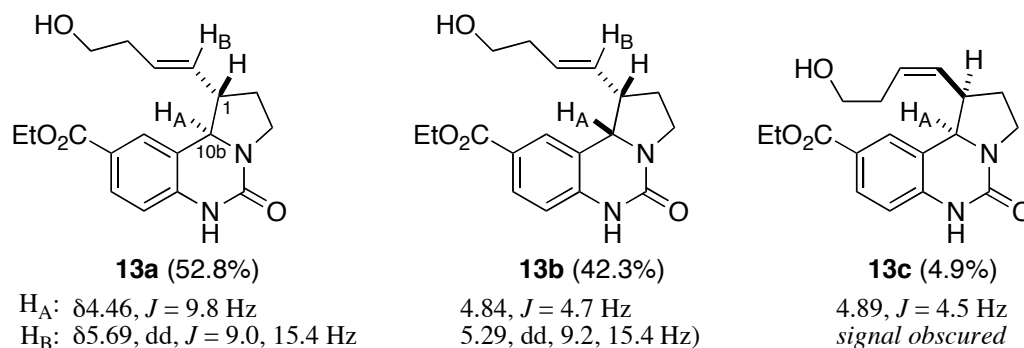

**( $\pm$ )-9-Carboethoxy-1-(4'-hydroxy-but-1'-enyl)-2,3,6,10b-tetrahydro-1H-pyrrolo[1,2-*c*]quinazolin-5-one (**13a–c**).** Prepared according to the general procedure using azido allylsilane **E2** (0.11 g, 0.24 mmol). Chromatography (1:3 hexanes:EtOAc) gave 0.05 g (64%) of a yellow solid as a mixture of isomers. MS (FAB+)  $m/z$  331 ( $M^+ + H$ ), 232, 154, 136; HRMS calcd for  $C_{18}H_{23}N_2O_4$  331.1658, found 331.1649. Full product characterization for **13a–c** is given above. (**1S,10bS**)-**13a** (diagnostic peaks only):  $^1H$  NMR (500 MHz,  $CDCl_3$ )  $\delta$  4.46 (d,  $J$  = 9.8 Hz, 1H), 5.69 (dd,  $J$  = 9.0, 15.4 Hz, 1H). (**1S,10bR**)-**13b** (diagnostic peaks only):  $^1H$  NMR (500 MHz,  $CDCl_3$ )  $\delta$  4.84 (d,  $J$  = 4.7 Hz, 1H), 5.29 (dd, 9.2, 15.4 Hz) 5.63 (m, 1H). (**1R,10bS**)-**13c** (diagnostic peaks only):  $^1H$  NMR (500 MHz,  $CDCl_3$ )  $\delta$  4.89 (d,  $J$  = 4.5 Hz, 1H).

### TFA-Promoted Cyclization Reactions

**Scheme G.** Synthesis of *N*-allylsilyl glutarimides.

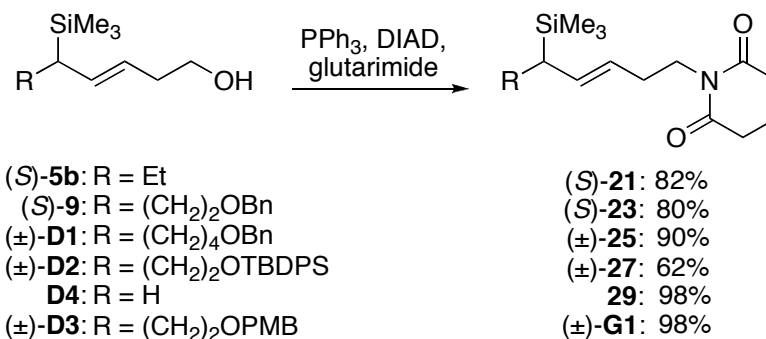

**General procedure for the preparation of *N*-allylsilyl glutarimides.**<sup>15</sup> To a solution of the allylsilyl alcohol (1.0 equiv), glutarimide (1.5 equiv), and triphenylphosphine (1.5 equiv) in THF at 0°C was added diisopropyl azodicarboxylate (1.5 equiv). The reaction mixture was warmed to room temperature and stirred for 16 h. Water was then added, and the mixture was extracted with ether. The combined organic extracts were washed with brine, dried (Na<sub>2</sub>SO<sub>4</sub>), filtered, and concentrated. The crude material was purified by chromatography to afford product.

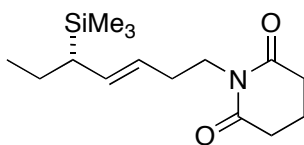

**(5'*S*,*E*)-1-[5'-Trimethylsilylhept-3'-enyl]piperidine-2,6-dione (21).** Prepared according to the general procedure from alcohol (*S*)-**5b** (0.26 g, 1.40 mmol). Chromatography (5:1 hexanes:EtOAc) gave 0.32 g (82%) of a pale yellow oil. [ $\alpha$ ]<sub>D</sub> +6.2 (*c* 0.90, CHCl<sub>3</sub>). <sup>1</sup>H NMR (400 MHz, CDCl<sub>3</sub>)  $\delta$  -0.05 (s, 9H), 0.88 (t, *J* = 7.1 Hz, 3H), 1.30 (m, 2H), 1.51 (m, 1H), 1.91 (quintet, *J* = 6.7 Hz, 2H), 2.24 (q, *J* = 7.1 Hz, 2H), 2.64 (t, *J* = 6.5 Hz, 4H), 3.82 (m, 2H), 5.21 (m, 2H); <sup>13</sup>C NMR (100.6 MHz, CDCl<sub>3</sub>)  $\delta$  -2.7, 14.7, 17.6, 22.3, 32.0, 33.3, 35.7, 40.0, 124.5, 134.6, 172.8; IR (film) 1726, 1673 cm<sup>-1</sup>; MS (CI) *m/z* 282 (M<sup>+</sup> + H), 90, 73; HRMS calcd for C<sub>15</sub>H<sub>28</sub>NsiO<sub>2</sub> (M<sup>+</sup> + H) 282.1889, found 282.1891.

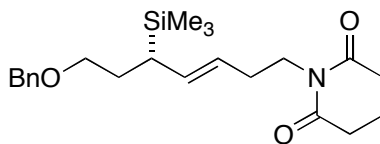

**(5'*S*,*E*)-1-[7'-Benzyloxy-5'-trimethylsilylhept-3'-enyl]piperidine-2,6-dione (23).** Prepared according to the general procedure from alcohol (*S*)-**9** (0.90 g, 3.0 mmol). Chromatography (6:1 to 3:1 hexanes:EtOAc) gave 0.93 g (80%) of a yellow oil. [ $\alpha$ ]<sub>D</sub> +17.6 (*c* 0.68, CHCl<sub>3</sub>). <sup>1</sup>H NMR (500 MHz, CDCl<sub>3</sub>)  $\delta$  -0.03 (s, 9H), 1.57 (m, 2H), 1.80

(m, 1H), 1.91 (quintet,  $J = 6.7$  Hz, 2H), 2.21 (q,  $J = 7.0$ , 2H), 2.62 (t,  $J = 6.6$  Hz, 4H), 3.39 (m, 1H), 3.51 (ddd,  $J = 3.9, 9.0, 17.8$  Hz, 1H), 3.77 (t,  $J = 7.6$  Hz, 2H), 4.50 (AB q,  $J = 11.4$  Hz,  $\Delta\nu = 22.2$  Hz, 2H), 5.20 (dt,  $J = 15.2, 6.7$  Hz, 1H), 5.30 (dd,  $J = 8.7, 15.3$  Hz, 1H), 7.33 (m, 5H);  $^{13}\text{C}$  NMR (125.8 MHz,  $\text{CDCl}_3$ )  $\delta$  -3.3, 17.1, 28.7, 29.4, 31.4, 32.8, 39.5, 70.0, 72.8, 124.3, 127.4, 127.5, 128.2, 133.4, 138.6, 172.3; IR (film) 1724, 1675  $\text{cm}^{-1}$ ; MS (CI)  $m/z$  388 ( $\text{M}^+ + \text{H}$ ), 298, 91; HRMS calcd for  $\text{C}_{22}\text{H}_{34}\text{NO}_3\text{Si}$  388.2308 ( $\text{M}^+ + \text{H}$ ), found 388.2286.

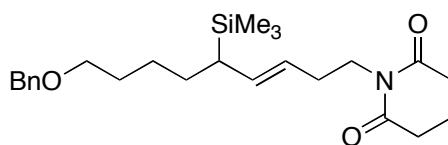

**(±)-(E)-1-[9'-Benzyloxy-5'-trimethylsilylnon-3'-enyl]piperidine-2,6-dione (25).**

Prepared according to the general procedure from alcohol **D1** (0.24 g, 0.75 mmol). The crude product was purified by chromatography (6:1 to 3:1 hexanes:EtOAc) to give 0.28 g (90%) of a colorless oil.  $^1\text{H}$  NMR (500 MHz,  $\text{CDCl}_3$ )  $\delta$  -0.05 (s, 9H), 1.28 (m, 2H), 1.43 (m, 4H), 1.55 (m, 1H), 1.64 (m, 1H), 1.89 (m, 2H), 2.25 (q,  $J = 6.9$  Hz, 2H), 2.62 (t,  $J = 6.4$  Hz, 4H), 3.46 (t,  $J = 6.5$  Hz, 2H), 3.80 (m, 2H), 4.51 (s, 2H), 5.18 (dt,  $J = 15.2, 6.7$  Hz, 1H), 5.25 (dd,  $J = 8.6, 15.3$  Hz, 1H), 7.34 (m, 5H);  $^{13}\text{C}$  NMR (100.6 MHz,  $\text{CDCl}_3$ )  $\delta$  -2.8, 17.6, 22.1, 26.3, 28.5, 29.0, 30.0, 32.0, 33.3, 40.0, 70.8, 73.2, 124.4, 128.0, 128.7, 134.6, 139.1, 172.8 IR (film) 1727, 1675  $\text{cm}^{-1}$ ; MS (CI)  $m/z$  416 ( $\text{M}^+ + \text{H}$ ), 266, 91; HRMS calcd for  $\text{C}_{24}\text{H}_{38}\text{NO}_3\text{Si}$  ( $\text{M}^+ + \text{H}$ ) 416.2621, found 416.2622.

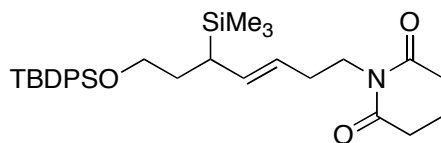

**(±)-(E)-1-[7'-(tert-Butyldiphenylsilyloxy)-5'-trimethylsilylhept-3'-enyl]piperidine-2,6-dione (27).** Prepared according to the general procedure from alcohol **D2** (0.14 g, 0.36 mmol). Chromatography (3:1 hexanes:EtOAc) afforded 0.12 g (62%) of a

pale yellow oil.  $^1\text{H}$  NMR (500 MHz,  $\text{CDCl}_3$ )  $\delta$  -0.05 (s, 9H), 1.06 (s, 10H), 1.52 (m, 2H), 1.73 (m, 1H), 1.85 (quintet,  $J = 6.4$  Hz, 2H), 2.18 (q,  $J = 7.2$  Hz, 2H), 2.58 (t,  $J = 6.5$  Hz, 4H), 3.59 (m, 1H), 3.73 (m, 3H), 5.12 (dt,  $J = 15.3, 6.7$  Hz, 1H), 5.20 (dd,  $J = 8.7, 15.3$  Hz, 1H), 7.41 (m, 6H), 7.68 (m, 4H);  $^{13}\text{C}$  NMR (125.7 MHz,  $\text{CDCl}_3$ )  $\delta$  -3.4, 17.1, 19.1, 21.7, 26.8, 28.8, 31.4, 32.8, 39.4, 63.3, 124.1, 127.5, 129.4, 133.5, 134.3, 135.5, 172.3; IR (film) 1727, 1678  $\text{cm}^{-1}$ ; MS (FAB+)  $m/z$  536 ( $\text{M}^+ + \text{H}$ ), 307, 154; HRMS calcd for  $\text{C}_{31}\text{H}_{49}\text{N}_2\text{Si}_2\text{O}_3$  ( $\text{M}^+ + \text{NH}_4$ ) 553.3282, found 553.3293.

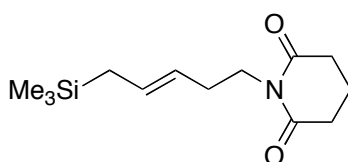

**(E)-1-[5'-(Trimethylsilyl)pent-3'-enyl]piperidine-2,6-dione (29).** Prepared according to the general procedure using known alcohol **D4** (0.10 g, 0.63 mmol).<sup>1</sup> The crude product was purified by chromatography (5:1 to 1:1 hexanes:EtOAc) to give 0.15 g (94%) of a colorless oil.  $^1\text{H}$  NMR (400 MHz,  $\text{CDCl}_3$ )  $\delta$  -0.02 (s, 9H), 1.31 (d,  $J = 8.0$  Hz, 2H), 1.92 (quintet,  $J = 6.5$  Hz, 2H), 2.20 (q,  $J = 7.7$  Hz, 2H), 2.64 (t,  $J = 6.5$  Hz, 4H), 3.78 (t,  $J = 7.5$  Hz, 2H), 5.21 (dt,  $J = 15.1, 7.1$  Hz, 1H), 5.44 (td,  $J = 8.0, 15.1$  Hz, 1H);  $^{13}\text{C}$  NMR (100.6 MHz,  $\text{CDCl}_3$ )  $\delta$  -1.6, 17.6, 23.1, 31.8, 33.3, 39.9, 125.0, 129.3, 172.8; IR (film) 1724, 1673  $\text{cm}^{-1}$ ; MS (CI)  $m/z$  254 ( $\text{M}^+ + \text{H}$ ) 199, 170, 73; HRMS calcd for  $\text{C}_{13}\text{H}_{23}\text{SiNO}_2$  ( $\text{M}^+ + \text{H}$ ) 254.1576, found 254.1573.

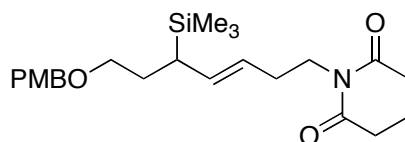

**(±)-(E)-1-(7'-(4''-Methoxybenzyloxy)-5'-trimethylsilylhept-3'-enyl)piperidine-2,6-dione (G1).** Prepared according to the general procedure from **D3** (0.40 g, 1.24 mmol). The crude product was purified by chromatography (3:1 to 2:1 hexanes:EtOAc) to give 0.51 g (98%) of a pale yellow oil.  $^1\text{H}$  NMR (400 MHz,  $\text{CDCl}_3$ )  $\delta$

–0.05 (s, 9H), 1.53 (m, 2H), 1.76 (m, 1H), 1.90 (quintet,  $J = 6.6$  Hz, 2H), 2.19 (q,  $J = 6.7$  Hz, 2H), 2.62 (t,  $J = 6.5$  Hz, 4H), 3.35 (m, 1H), 3.46 (m, 1H), 3.75 (t,  $J = 7.5$  Hz, 2H), 3.80 (s, 3H), 4.41 (AB q  $J = 11.5$  Hz,  $\Delta\nu = 17.9$  Hz, 2H), 5.18 (dt,  $J = 15.2, 6.5$  Hz, 1H), 5.27 (dd  $J = 15.3, 8.6$  Hz, 1H), 6.88 (m, 2H), 7.26 (m, 2H);  $^{13}\text{C}$  NMR (100.6 MHz,  $\text{CDCl}_3$ )  $\delta$  –3.28, 17.2, 28.7, 29.5, 31.5, 32.9, 39.6, 55.3, 70.0, 72.5, 113.7, 124.4, 129.2, 130.8, 133.5, 159.1, 172.4; IR (film) 1695, 1640, 1475  $\text{cm}^{-1}$ ; MS (ES+)  $m/z$  418 ( $\text{M}^+ + \text{H}$ ), 409, 354, 313, 227; HRMS calcd for  $\text{C}_{23}\text{H}_{36}\text{NO}_4\text{Si}$  ( $\text{M}^+ + \text{H}$ ) 418.2414, found 418.2431.

**Scheme H.** TFA-promoted cyclizations of hydroxy lactams.

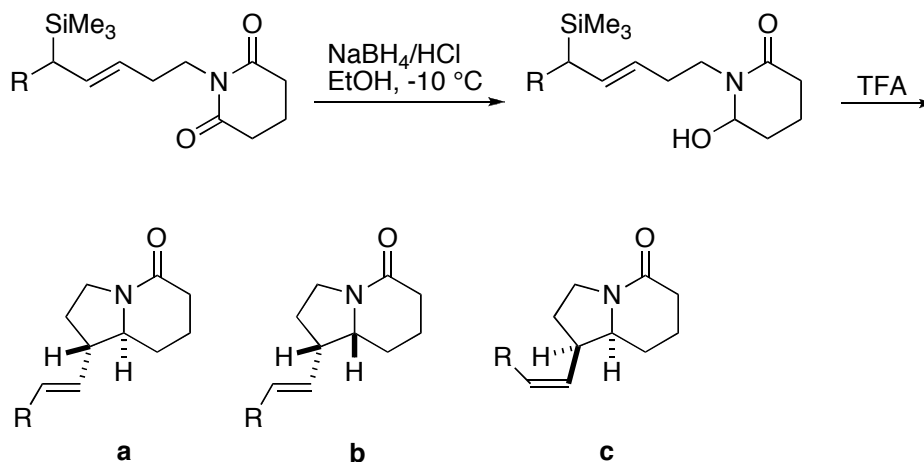

**General procedure for TFA-promoted cyclization reactions.** According to the procedure of Speckamp,<sup>15, 16</sup>  $\text{NaBH}_4$  (4.0 equiv) was added to a solution of the *N*-allylsilyl glutarimide in 100%  $\text{EtOH}$  at  $-10^\circ\text{C}$ . At 15 min intervals, 2–3 drops of 2N  $\text{HCl}$  in 100%  $\text{EtOH}$  were added while maintaining the temperature at  $-10^\circ\text{C}$ . After 4 to 6 h (monitored by TLC), the reaction was quenched with water, and the mixture was extracted with  $\text{CH}_2\text{Cl}_2$  ( $3 \times 20$  mL). The combined organic extracts were dried ( $\text{Na}_2\text{SO}_4$ ), filtered, and concentrated. The crude product was passed through a short column of silica gel ( $\text{EtOAc}$ ) to afford a pale yellow oil. The hydroxy lactam thus obtained was dissolved in  $\text{CH}_2\text{Cl}_2$  (to give a 0.01 to 0.005 M solution), and the resulting solution was cooled to  $0^\circ\text{C}$  or  $-55^\circ\text{C}$ .

CF<sub>3</sub>CO<sub>2</sub>H (4.0 equiv) was then added dropwise to the reaction mixture and stirring was continued at the indicated temperature for 2h (at 0 °C) or 24 h (at –55 °C). The reaction was quenched with saturated aq NaHCO<sub>3</sub>, and the aqueous layer was extracted with CH<sub>2</sub>Cl<sub>2</sub>. The combined organic layers were washed with brine, dried (Na<sub>2</sub>SO<sub>4</sub>), filtered, and concentrated. Chromatography afforded lactam product as a mixture of isomers. <sup>1</sup>H NMR integration values of the crude reaction mixtures were used for product ratio determinations (normalized to 100%).

*Determination of product stereochemistry and isomer ratios:* The assignment of relative configuration for the lactam products was based on the <sup>1</sup>H NMR chemical shifts and coupling patterns of the 1H and 8aH peaks. Chemical shift values for these hydrogens were established by HMQC and <sup>1</sup>H–<sup>1</sup>H COSY NMR. The chemical shift of the C8a hydrogen was highly dependent on the relative configuration of the C1 hydrogen in a manner consistent with reports by Speckamp for bicyclic lactams of similar structure.<sup>15, 17</sup> The C8a hydrogen absorption of the cis diastereomer occurred between 3.54 and 3.57 ppm, while that of the trans isomer occurred between 3.04 and 3.06 ppm. The cis diastereomer also displayed two C1 hydrogen absorptions centered around 3.15 and 2.73 ppm that were established as arising from Z and E olefin isomers, respectively. Diastereomeric and olefin geometric ratios were determined by <sup>1</sup>H NMR integration values.

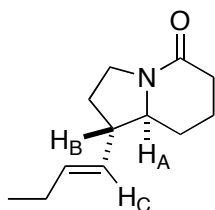**22a** (7.9%)

H<sub>A</sub>: δ 3.04, td, *J* = 10.6, 3.4 Hz  
H<sub>C</sub>: δ 5.27, dd, *J* = 7.9, 15.3 Hz

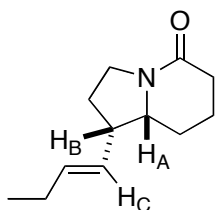**22b** (28.2%)

H<sub>B</sub>: δ 2.75, quint, *J* = 5.5 Hz  
H<sub>C</sub>: δ 5.19, dd, *J* = 5.7, 15.3 Hz

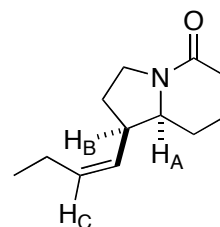**22c** (63.9%)

H<sub>A</sub>: δ 3.54, dt, *J* = 11.5, 4.4 Hz  
H<sub>B</sub>: δ 3.11, quint, *J* = 5.5 Hz  
H<sub>C</sub>: δ 5.10, t, *J* = 1.5, 10.7 Hz

**1-(But-1'-enyl)hexahydroindolizin-5-one (22a–c).** Prepared according to the general procedure from (*S*)-**21** (0.11 g, 0.39 mmol); cyclization was done at –55 °C. Chromatography (EtOAc) gave 0.070 g (92%) of a colorless oil as a mixture of isomers. IR (film) 1632, 1462 cm<sup>–1</sup>; MS (CI) *m/z* 194 (*M*<sup>+</sup> + H), 111, 55; HRMS calcd for C<sub>12</sub>H<sub>20</sub>NO (*M*<sup>+</sup> + H) 194.1545, found 194.1552. Major isomer (**1R,8aS**)-(Z)-**22c**: <sup>1</sup>H NMR (500 MHz, CDCl<sub>3</sub>) δ 0.98 (t, *J* = 7.5 Hz, 3H), 1.35 (m, 1H), 1.64–1.81 (m, 3H), 1.92–2.09 (complex, 4H), 2.24 (m, 1H), 2.40 (dd, *J* = 6.1, 17.8 Hz, 1H), 3.11 (quintet, *J* = 5.5 Hz, 1H), 3.49 (m, 1H), 3.54 (dt, *J* = 11.5, 4.4 Hz, 1H), 3.63 (ddd, *J* = 8.5, 8.0, 8.1 Hz, 1H), 5.10 (tt, *J* = 1.5, 10.7 Hz, 1H), 5.51 (td, *J* = 7.6, 10.3 Hz, 1H); <sup>13</sup>C NMR (125.8 MHz, CDCl<sub>3</sub>) δ 14.2, 20.8, 25.2, 29.2, 31.1, 39.7, 43.2, 61.7, 126.0, 133.4, 169.4. (**1S,8aR**)-(E)-**22b** (diagnostic peaks only): <sup>1</sup>H NMR (500 MHz, CDCl<sub>3</sub>) δ 2.75 (quintet, *J* = 5.5 Hz, 1H), 5.19 (dd, *J* = 5.7, 15.3 Hz, 1H), 5.53 (dt, *J* = 15.0, 6.3 Hz, 1H); <sup>13</sup>C NMR (125.8 MHz, CDCl<sub>3</sub>) δ 13.7, 20.7, 25.5, 28.9, 31.1, 43.4, 45.4, 61.8, 126.2, 134.3. (**1S,8aS**)-(E)-**22a** (diagnostic peaks only): <sup>1</sup>H NMR (500 MHz, CDCl<sub>3</sub>) δ 3.04 (td, *J* = 10.6, 3.4 Hz, 1H), 5.27 (dd, *J* = 7.9, 15.3 Hz, 1H), 5.61 (dt, *J* = 5.8, 15.3 Hz, 1H); <sup>13</sup>C NMR (125.8 MHz, CDCl<sub>3</sub>) δ 13.6, 20.9, 25.4, 29.4, 44.1, 49.7, 63.4, 127.3, 134.9.

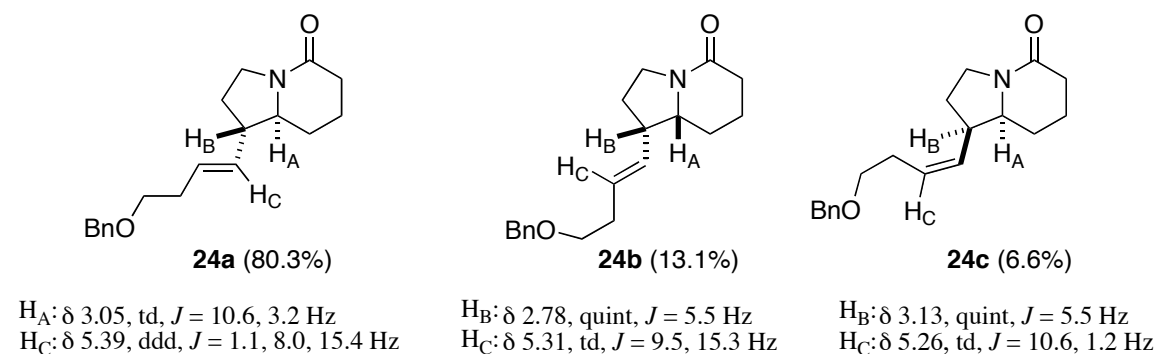

**1-(4'-Benzyloxy-but-1'-enyl)hexahydroindolizin-5-one (24a–c).** Prepared according to the general procedure using **23** (0.25 g, 0.65 mmol); cyclization was done at  $-55$  °C. Chromatography (EtOAc) gave 0.17 g (87%) of a colorless oil as a mixture of isomers. IR (film) 1726, 1644  $\text{cm}^{-1}$ ; MS (CI)  $m/z$  300 ( $M^+ + H$ ), 111, 91; HRMS calcd for  $C_{19}H_{26}NO_2$  ( $M^+ + H$ ) 300.1964, found 300.1951. Major isomer **(1S,8aS)-(E)-24a**:  $^1H$  NMR (500 MHz,  $CDCl_3$ )  $\delta$  1.17 (dq,  $J$  = 1.9, 11.0 Hz, 1H), 1.64 (m, 2H), 1.95 (m, 1H), 2.06 (m, 2H), 2.26 (m, 2H), 2.38 (q,  $J$  = 6.7 Hz, 2H), 2.45 (dd,  $J$  = 6.6, 18.0 Hz, 1H), 3.05 (td,  $J$  = 10.6, 3.2 Hz, 1H), 3.53 (t,  $J$  = 7.4 Hz, 4H), 4.53 (s, 2H), 5.39 (ddd,  $J$  = 1.1, 8.0, 15.4 Hz, 1H), 5.62 (td,  $J$  = 6.8, 15.4 Hz, 1H), 7.34 (m, 5H);  $^{13}C$  NMR (125.8 MHz,  $CDCl_3$ )  $\delta$  20.9, 27.4, 29.3, 31.0, 33.0, 44.1, 49.8, 63.3, 69.7, 72.8, 127.5, 127.5, 128.3, 129.5, 130.4, 138.3, 169.1. **(1R,8aS)-(Z)-24c** (diagnostic peaks only):  $^1H$  NMR (500 MHz,  $CDCl_3$ )  $\delta$  1.35 (m, 1H), 3.13 (quintet,  $J$  = 5.5 Hz, 1H), 5.26 (td,  $J$  = 10.6, 1.2 Hz, 1H); **(1S,8aR)-(E)-24b** (diagnostic peaks only):  $^1H$  NMR (500 MHz,  $CDCl_3$ )  $\delta$  2.78 (quintet,  $J$  = 5.5 Hz, 1H), 5.31 (dd,  $J$  = 9.5, 15.3 Hz, 1H).

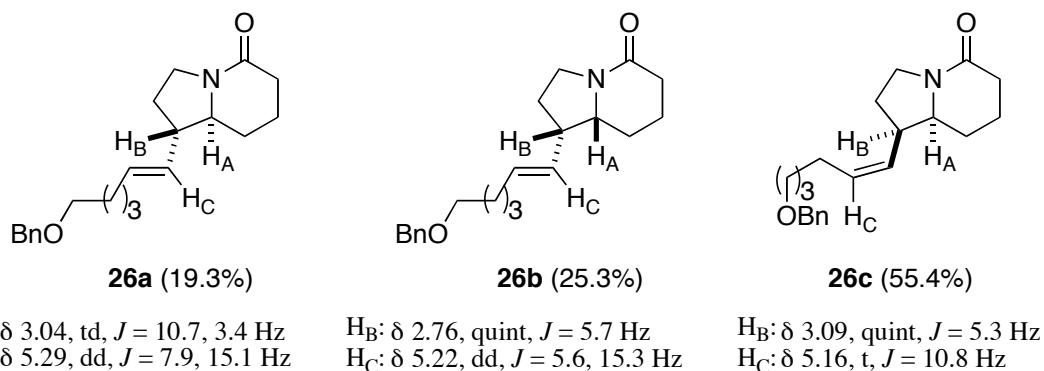

**( $\pm$ )-1-(6'-Benzyloxyhex-1'-enyl)hexahydroindolizin-5-one (26a–c).** Prepared according to the general procedure from **25** (0.10, 0.24 mmol); cyclization was done at 0 °C. Chromatography (20:1 EtOAc:MeOH) gave 0.070 g (82%) of a colorless oil as a mixture of isomers. IR (film) 1639, 1453  $\text{cm}^{-1}$ ; MS (FAB+)  $m/z$  328 ( $M^+ + H$ ), 236, 154; HRMS calcd for  $C_{21}H_{30}NO_2$  ( $M^+ + H$ ) 328.2277, found 328.2261. Major isomer (**1R\*,8aS\***)-(**Z**)-**26c**:  $^1\text{H}$  NMR (400 MHz,  $\text{CDCl}_3$ )  $\delta$  1.32 (m, 2H), 1.45 (quintet,  $J$  = 7.7 Hz, 2H), 1.65 (m, 4H), 1.76 (m, 1H), 1.94 (m, 2H), 2.03 (m, 3H), 2.24 (m, 1H), 2.41 (m, 1H), 3.09 (quintet,  $J$  = 5.3 Hz, 1H), 3.47 (t,  $J$  = 6.3 Hz, 2H), 3.63 (m, 1H), 4.52 (s, 2H), 5.16 (t,  $J$  = 10.8 Hz, 1H), 5.47 (dt,  $J$  = 10.4, 6.2 Hz, 1H), 7.33 (m, 5H);  $^{13}\text{C}$  NMR (100.6 MHz,  $\text{CDCl}_3$ )  $\delta$  21.3, 25.7, 26.7, 27.7, 29.6, 31.5, 40.2, 43.7, 50.2, 62.2, 70.6, 73.3, 127.4, 127.9, 128.7, 132.0, 132.9, 139.0, 169.9. (**1S\*,8aR\***)-(**E**)-**26b** (diagnostic peaks only):  $^1\text{H}$  NMR (400 MHz,  $\text{CDCl}_3$ )  $\delta$  2.76 (quintet,  $J$  = 5.7 Hz, 1H), 5.22 (dd,  $J$  = 5.6, 15.3 Hz, 1H). (**1S\*,8aS\***)-(**E**)-**26a** (diagnostic peaks only):  $^1\text{H}$  NMR (400 MHz,  $\text{CDCl}_3$ )  $\delta$  3.04 (td,  $J$  = 10.7, 3.4 Hz, 1H), 5.29 (dd,  $J$  = 7.9, 15.1 Hz, 1H), 5.58 (dt,  $J$  = 15.3, 6.7 Hz, 1H).

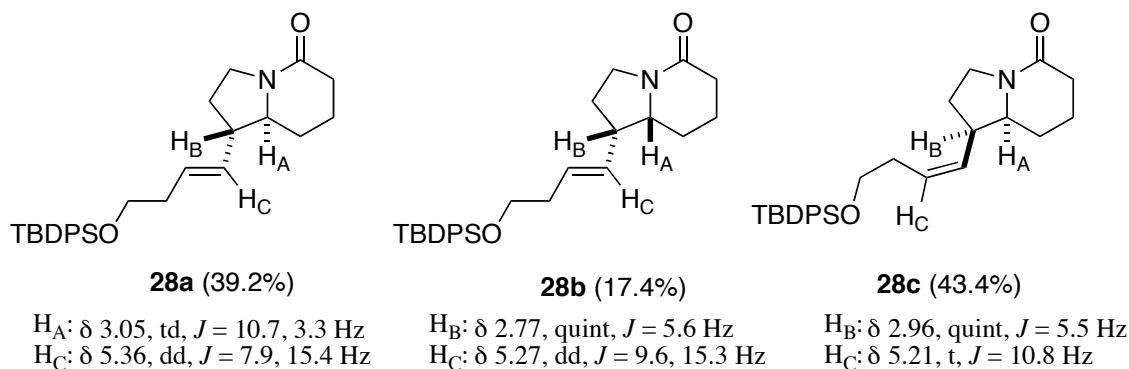

**(±)-1-[4'-(*tert*-Butyldiphenylsilyloxy)but-1'-enyl]hexahydroindolizin-5-one**

**(28a–c).** Prepared according to the general procedure from **27** (0.09 g, 0.15 mmol); cyclization was done at 0 °C. Chromatography (EtOAc) gave 0.05 g (74%) of a pale yellow oil as a mixture of isomers. IR (film) 1641, 1111  $\text{cm}^{-1}$ ; MS (FAB+)  $m/z$  448 ( $M^+ + H$ ), 390, 154, 136; HRMS calcd for  $C_{28}H_{38}N\text{SiO}_2$  ( $M^+ + H$ ) 448.2672, found 448.2653. Major isomer (**1R\*,8aS\***)-(Z)-**28c**:  $^1\text{H}$  NMR (500 MHz,  $\text{CDCl}_3$ )  $\delta$  1.06 (s, 9H), 1.28 (m, 1H), 1.63 (m, 4H), 1.87–2.45 (m, 5H), 2.96 (quintet,  $J = 5.5$  Hz, 1H), 3.45–3.74 (m, 5H), 5.21 (t,  $J = 10.8$  Hz, 1H), 5.54 (dt, 10.2, 7.7 Hz, 1H), 7.41 (m, 6H), 7.69 (m, 4H);  $^{13}\text{C}$  NMR (125.7 MHz,  $\text{CDCl}_3$ )  $\delta$  19.1, 20.8, 25.2, 26.7, 27.5, 29.1, 31.0, 35.9, 39.8, 43.2, 49.8, 61.6, 63.4, 127.5, 129.5, 133.8, 135.5, 169.4. (**1S\*,8aR\***)-(E)-**28b** (diagnostic peaks only):  $^1\text{H}$  NMR (500MHz,  $\text{CDCl}_3$ )  $\delta$  2.77 (quintet,  $J = 5.6$  Hz, 1H), 5.27 (dd,  $J = 9.6, 15.3$  Hz, 1H);  $^{13}\text{C}$  NMR (127.5 MHz,  $\text{CDCl}_3$ )  $\delta$  19.1, 20.9, 28.9, 43.4, 63.6, 127.7, 135.5. (**1S\*,8aS\***)-(E)-**28a** (diagnostic peaks only):  $^1\text{H}$  NMR (500 MHz,  $\text{CDCl}_3$ )  $\delta$  3.05 (td,  $J = 10.7, 3.3$  Hz, 1H), 5.36 (dd,  $J = 7.9, 15.4$  Hz, 1H), 5.61 (dt,  $J = 15.2, 6.9$  Hz, 1H);  $^{13}\text{C}$  NMR (127.5 MHz,  $\text{CDCl}_3$ )  $\delta$  19.2, 20.9, 29.3, 44.2, 61.8, 63.4, 127.5, 129.5, 133.7, 135.5, 169.2.

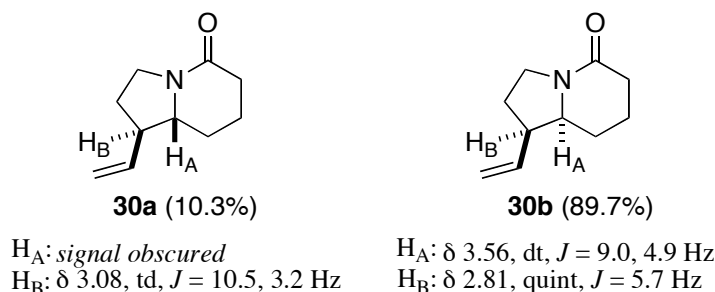

**(±)-1-Vinylhexahydroindolizin-5-one (30a,b).** Prepared according to the general procedure from **29** (0.23 g, 0.91 mmol); cyclization was done at 0 °C. Chromatography (20:1 EtOAc:MeOH) gave 0.11 g (71%) of a pale yellow oil as a mixture of isomers. IR (film) 1637, 1465, 1447, 1410  $\text{cm}^{-1}$ ; MS (CI)  $m/z$  166 ( $M^+ + 1$ ), 150, 111; HRMS calcd for  $\text{C}_{10}\text{H}_{16}\text{NO}$  ( $M^+ + \text{H}$ ) 166.1232, found 166.1230. Major isomer (**1R\*,8aS\***)-**30b**:  $^1\text{H}$  NMR (500 MHz,  $\text{CDCl}_3$ )  $\delta$  1.35 (m, 1H), 1.69 (m, 1H), 1.83 (m, 2H), 1.93-2.03 (complex, 2H), 2.27 (m, 1H), 2.42 (dd,  $J$  = 4.8, 14.3 Hz, 1H), 2.81 (quintet,  $J$  = 5.7, 1H), 3.50 (t,  $J$  = 8.3 Hz, 1H), 3.56 (dt,  $J$  = 9.0, 4.9 Hz, 1H), 3.65 (q,  $J$  = 8.3 Hz, 1H), 5.10 (dd,  $J$  = 1.5, 11.5 Hz, 2H), 5.63 (m, 1H);  $^{13}\text{C}$  NMR (125.8 MHz,  $\text{CDCl}_3$ )  $\delta$  20.9, 25.5, 28.5, 31.3, 43.3, 46.6, 61.6, 116.5, 135.9, 169.4. (**1R\*,8aR\***)-**30a** (diagnostic peak only):  $^1\text{H}$  NMR (500 MHz,  $\text{CDCl}_3$ )  $\delta$  3.08 (td,  $J$  = 10.5, 3.2 Hz, 1H).

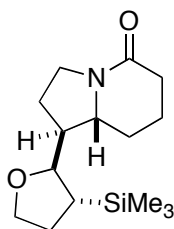

**(1S\*,8aR\*2'S\*,3'R\*)-1-(3'-Trimethylsilyltetrahydrofuran-2'-yl)hexahydroindolizin-5(1H)-one (37).** Prepared according to the general procedure from **G1** (0.28 g, 0.68 mmol); cyclization was done at 0 °C. The crude product was purified by chromatography (EtOAc) to give 0.03 g (20%) of a colorless oil.  $^1\text{H}$  NMR (400 MHz,  $\text{CDCl}_3$ )  $\delta$  0.05 (s, 9H), 1.19 (m, 1H), 1.26 (m, 1H), 1.54 (m, 1H), 1.64–1.78 (complex, 2H), 1.90 (m, 3H), 2.08 (m, 1H), 2.33 (m, 2H), 2.42 (m, 2H), 3.35 (m, 1H), 3.46 (m, 1H),

3.61 (m, 1H), 3.70 (q,  $J = 7.3$  Hz, 1H), 3.76 (dd,  $J = 7.7, 4.8$  Hz, 1H), 3.81 (m, 1H);  $^{13}\text{C}$  NMR (100.6 MHz,  $\text{CDCl}_3$ )  $\delta$  -2.4, 21.1, 26.8, 28.9, 29.8, 30.2, 30.9, 44.1, 50.7, 62.4, 67.4, 83.0, 169.4; IR (film) 1640, 1460  $\text{cm}^{-1}$ ; MS (ES+)  $m/z$  282 ( $\text{M}^+ + \text{H}$ ); HRMS calcd for  $\text{C}_{15}\text{H}_{28}\text{NO}_2\text{Si}$  282.1889 ( $\text{M}^+ + \text{H}$ ), found 282.1914.

### TMSOTf-Promoted Oxenium Cyclization Reactions

**General procedure for oxenium ion cyclization reactions.** According to the procedure of Ito,<sup>18</sup> TMSOTf (0.83 mmol) was added to a solution of the allylsilyl alcohol (0.75 mmol) and aldehyde (0.83 mmol) in  $\text{CH}_2\text{Cl}_2$  at  $-78$  °C. After stirring at  $-78$  °C for 2.5 h, a 10% aq NaOH solution (10 mL) was added to the reaction mixture, which was subsequently warmed to room temperature. The layers were separated and the aqueous layer was extracted with  $\text{CH}_2\text{Cl}_2$  ( $3 \times 20$  mL). The combined organic layers were washed with brine, dried ( $\text{Na}_2\text{SO}_4$ ), filtered, and concentrated. The crude reaction mixture was purified by chromatography to afford the corresponding products.

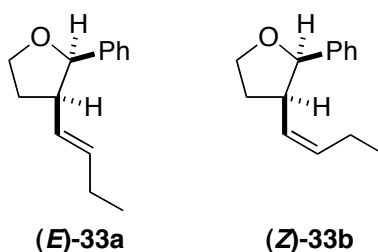

**(±)-3-But-1-enyl-2-phenyl tetrahydrofuran (33a,b).** Prepared according to the general procedure using allylsilane (±)-**1** (0.080 g, 0.44 mmol) and benzaldehyde (0.050 g, 0.49 mmol). The crude product was purified by chromatography (20:1 hexanes:ether) to give 0.061 g (67%) of a colorless oil as a 2:1 mixture of olefin isomers based on  $^1\text{H}$  NMR integration. IR (film) 1604, 1493, 1451  $\text{cm}^{-1}$ ; MS (CI)  $m/z$  203 ( $\text{M}^+ + \text{H}$ ), 159, 96, 81; HRMS calcd for  $\text{C}_{14}\text{H}_{19}\text{O}$  ( $\text{M}^+ + \text{H}$ ) 203.1436, found 203.1426. Major isomer (**2R\*,3R\***)-**(E)-33a**:  $^1\text{H}$  NMR (500 MHz,  $\text{CDCl}_3$ )  $\delta$  0.80 (t,  $J = 7.5$  Hz, 3H), 1.85 (quintet,  $J = 6.7$  Hz, 2H), 1.93 (m, 1H), 2.16 (m, 1H), 3.08 (quintet,  $J = 7.5$  Hz, 1 H), 4.00 (q,  $J =$

8.1 Hz, 1H), 4.30 (m, 1H), 4.83 (dd,  $J = 9.0, 15.5$  Hz, 1H), 5.04 (d,  $J = 7.2$  Hz, 1H), 5.42 (td,  $J = 6.4, 15.3$  Hz, 1H), 7.27 (m, 5H);  $^{13}\text{C}$  NMR (125.8 MHz,  $\text{CDCl}_3$ )  $\delta$  13.5, 25.3, 32.2, 47.2, 68.0, 83.5, 126.5, 126.7, 127.6, 128.1, 133.2, 140.6. **(2*R*\*,3*R*\*)-(*Z*)-1.70b** (diagnostic peaks only):  $^1\text{H}$  NMR (400 MHz,  $\text{CDCl}_3$ )  $\delta$  3.43 (m, 1H), 5.25 (dt,  $J = 10.8, 7.3$  Hz, 1H);  $^{13}\text{C}$  NMR (100.6 MHz,  $\text{CDCl}_3$ )  $\delta$  14.7, 21.2, 33.4, 42.0, 68.4, 83.7, 126.9, 127.2, 128.1, 128.4, 132.8, 141.0.

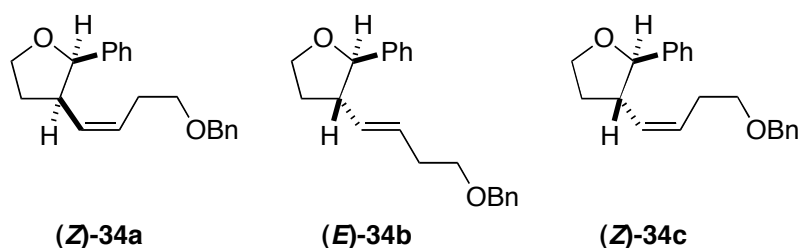

**(±)-3-(4'-Benzyloxybut-1'-enyl)-2-phenyl tetrahydrofuran (34a–c).** Prepared according to the general procedure from allylsilane (±)-**2** (0.22 g, 0.75 mmol) and benzaldehyde (0.09 g, 0.83 mmol). The crude product was purified by chromatography (20:1 to 5:1 hexanes:ether) to give 0.13 g (56%) of a colorless oil as a 3:1 (*E*/*Z*) mixture of olefin isomers, and 1:12 overall *cis*:*trans* (i.e., **a**:(**b**+**c**)) diastereomeric ratio based on  $^1\text{H}$  NMR integration. IR (film) 1603, 1494, 1453  $\text{cm}^{-1}$ ; MS (CI)  $m/z$  309 ( $\text{M}^+ + \text{H}$ ), 217, 104; HRMS calcd for  $\text{C}_{21}\text{H}_{25}\text{O}_2$  ( $\text{M}^+ + \text{H}$ ) 309.1855, found 309.1847. Major isomer **(2*R*\*,3*S*\*)-(*E*)-34b**:  $^1\text{H}$  NMR (500 MHz,  $\text{CDCl}_3$ )  $\delta$  1.97 (m, 1H), 2.28 (m, 1H), 2.36 (q,  $J = 6.8$  Hz, 2H), 2.68 (quintet,  $J = 8.2$  Hz, 1H), 3.51 (t,  $J = 6.8$  Hz, 2H), 4.10 (td,  $J = 8.4, 4.3$  Hz, 1H), 4.14 (q,  $J = 8.3$  Hz, 1H), 4.51 (d,  $J = 8.4$  Hz, 1H), 4.54 (s, 2H), 5.46 (td,  $J = 6.7, 15.4$  Hz, 1H), 5.56 (dd,  $J = 7.9, 15.4$  Hz, 1H), 7.33 (m, 10 H);  $^{13}\text{C}$  NMR (125.8 MHz,  $\text{CDCl}_3$ )  $\delta$  33.0, 33.7, 47.3, 51.7, 68.1, 69.9, 72.8, 125.9, 127.2, 127.4, 127.6, 127.6, 128.1, 128.3, 131.2, 138.4, 141.7. **(2*R*\*,3*S*\*)-(*Z*)-34c** (diagnostic peaks only):  $^1\text{H}$  NMR (500 MHz,  $\text{CDCl}_3$ )  $\delta$  3.11 (quintet,  $J = 8.1$  Hz, 1H), 3.30 (t,  $J = 6.9$  Hz, 2H), 4.00 (q,  $J = 8.1$  Hz, 1H), 4.30 (td,  $J = 7.0, 2.7$  Hz, 1H), 4.46 (s, 2H), 5.04 (d,  $J = 7.2$  Hz, 1H);  $^{13}\text{C}$  NMR (125.8 MHz,  $\text{CDCl}_3$ )  $\delta$  32.1, 32.7, 68.0, 69.9, 72.7, 126.4, 126.7, 128.3, 128.6,

131.3138.4. **(2*R*\*,3*R*\*)-(*Z*)-34a** (diagnostic peaks only):  $^1\text{H}$  NMR (500 MHz,  $\text{CDCl}_3$ )  $\delta$  5.31 (dt,  $J = 11.2, 3.4$  Hz, 1H).

### Determination of Absolute Configurations

The absolute configuration of the major isomer obtained in the cyclization reactions employing the enantioenriched azido allylsilanes (*S*)-**1.10** and (*S*)-**1.11** were determined by heavy atom anomalous dispersion X-ray analysis of the corresponding *p*-bromobenzoyl derivatives. In general, preparation of the latter was accomplished by oxidative cleavage of the side chain olefin followed by reduction to the corresponding alcohol and esterification. X-Ray data is given in the Appendix.

**General procedure for oxidative cleavage/reduction reactions.**  $\text{OsO}_4$  (5 mg/mL solution in water, 0.05 equiv) was added to a solution of the olefin (1.0 equiv) and NMO (50% w/v solution in water, 1.5 equiv) in acetone/water/*t*-BuOH (5:5:1, 11 mL total volume), and the resulting mixture was stirred at room temperature for 24 h. Saturated aq  $\text{NaHSO}_3$  was then added, and the mixture was stirred for 20 min at room temperature. The reaction mixture was extracted several times (EtOAc), and the combined organic extracts were dried ( $\text{Na}_2\text{SO}_4$ ), filtered, and concentrated. The resulting residue was passed through a pad of silica gel (10:1  $\text{CH}_2\text{Cl}_2$ :MeOH) to give the corresponding diol. The diol thus obtained (1.0 equiv) was dissolved in 10% aq THF (ca. 10 mL) and cooled to 0 °C.  $\text{NaIO}_4$  (1.3 equiv) was then added and the mixture was stirred at 0 °C for 1 h. The reaction mixture was diluted with water (ca. 5 mL) and extracted with EtOAc. The combined organic extracts were dried ( $\text{Na}_2\text{SO}_4$ ), filtered through Celite, and concentrated. The resulting residue was dissolved in MeOH (ca. 10 mL) and cooled to 0 °C.  $\text{NaBH}_4$  (5.0 equiv) was then added, the ice bath was removed, and stirring at room temperature was continued for 2 h. The reaction was quenched with water and extracted with  $\text{CH}_2\text{Cl}_2$ . The combined organic extracts were dried ( $\text{Na}_2\text{SO}_4$ ), filtered, and concentrated. Chromatography afforded the corresponding alcohol.

**General procedure for the preparation of *p*-bromobenzoyl esters.** To a solution of the alcohol (1.0 equiv), triethylamine (3.0 equiv), and a spatula tip amount of DMAP in CH<sub>2</sub>Cl<sub>2</sub> (ca. 5.0 mL) at 0 °C, was added 4-bromobenzoyl chloride (1.2 equiv). The reaction mixture was subsequently allowed to warm to room temperature and stirred for 16 h. A saturated aqueous solution of NH<sub>4</sub>Cl (10 mL) was then added to the reaction mixture and the aqueous layer was extracted with CH<sub>2</sub>Cl<sub>2</sub> (3 × 20 mL). The combined organic extracts were washed with brine (1 × 20 mL), dried (Na<sub>2</sub>SO<sub>4</sub>), filtered, and concentrated. Chromatography gave the corresponding *p*-bromobenzoyl ester.

**Scheme H.** Preparation of *p*-bromobenzoyl ester **19a**.

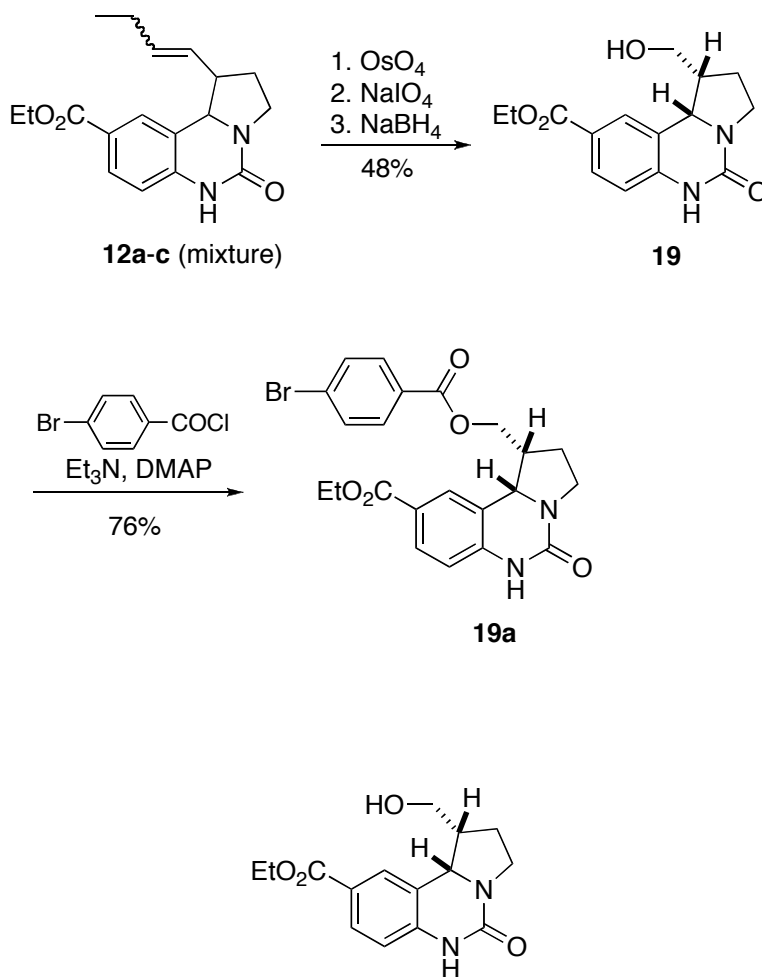

**(1*R*,10*aS*)-9-Carboethoxy-1-hydroxymethyl-2,3,6,10*b*-tetrahydro-1*H*-pyrrolo[1,2-*c*]quinazolin-5-one (**19**).** Prepared according to the general procedure for

the oxidative cleavage/reduction reaction sequence using the purified product mixture containing **12a–c** (0.18 g, 0.58 mmol). Chromatography (20:1 EtOAc:MeOH) gave 0.081 g (48%) of **19** (isolated as a single isomer) as a white foam.  $[\alpha]_D -54.0$  ( $c$  0.05,  $\text{CHCl}_3$ );  $^1\text{H}$  NMR (500 MHz,  $\text{CDCl}_3$ )  $\delta$  1.40 (t,  $J = 7.1$  Hz, 3H), 2.06 (m, 1H), 2.27 (ddd,  $J = 2.2, 8.5, 12.8$  Hz, 1H), 2.81 (m, 1H), 3.33 (m, 1H), 3.50 (dt,  $J = 1.2, 10.6$  Hz, 1H), 3.69 (m, 1H), 3.87 (m, 1H), 4.36 (t,  $J = 7.6$  Hz, 2H), 4.93 (d,  $J = 4.9$  Hz, 1H), 6.81 (d, 8.4 Hz, 1H), 7.78 (s, 1H), 7.84 (d,  $J = 8.4$  Hz, 1H), 8.62 (br, s, 1H);  $^{13}\text{C}$  NMR (125.8 MHz,  $\text{CDCl}_3$ )  $\delta$  14.1, 14.3, 24.7, 43.2, 43.3, 60.5, 60.9, 113.9, 117.0, 123.7, 128.0, 130.2, 141.2, 152.4, 166.0; IR (film) 3320, 1669, 1614  $\text{cm}^{-1}$ ; MS (CI)  $m/z$  291 ( $\text{M}^+ + \text{H}$ ), 122, 105; HRMS calcd for  $\text{C}_{15}\text{H}_{19}\text{N}_2\text{O}_4$  ( $\text{M}^+ + \text{H}$ ) 291.1345, found 291.1326.

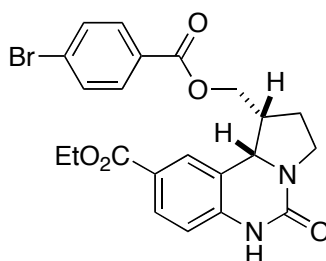

**(1R,10aS)-1-(4'-Bromobenzoyloxymethyl)-9-carboethoxy-2,3,6,10b-tetrahydro-1H-pyrrolo[1,2-c]quinazolin-5-one (19a).** Prepared according to the general procedure for preparation of *p*-bromobenzoyl esters using **19** (0.06 g, 0.21 mmol). Chromatography (1:2 hexanes:EtOAc) gave 0.070 g (76%) of a white solid that was crystallized from EtOAc/hexanes. Mp 186–188 °C;  $[\alpha]_D -95.6$  ( $c$  0.25,  $\text{CHCl}_3$ );  $^1\text{H}$  NMR (400 MHz,  $\text{CDCl}_3$ )  $\delta$  1.37 (t,  $J = 7.1$  Hz, 3H), 2.20 (m, 2H), 3.15 (m, 1H), 3.55 (dt,  $J = 2.7, 10.3$  Hz, 1H), 3.96 (q,  $J = 8.9$  Hz, 1H), 4.13 (m, 1H), 4.32 (m, 3H), 5.05 (d,  $J = 4.8$  Hz, 1H), 6.83 (d,  $J = 8.2$  Hz, 1H), 7.47 (d,  $J = 8.5$  Hz, 2H), 7.74 (d,  $J = 8.5$  Hz, 2H), 7.83 (d,  $J = 8.1$  Hz, 2H), 9.11 (s, 1H);  $^{13}\text{C}$  NMR (100.6 MHz,  $\text{CDCl}_3$ )  $\delta$  14.8, 25.9, 41.2, 43.6, 61.1, 61.3, 64.1, 114.6, 116.8, 124.5, 128.6, 128.7, 128.8, 130.9, 131.5, 132.0, 141.6, 152.8, 166.0, 166.3; IR (film) 1715, 1670, 1618, 1457; MS (CI)  $m/z$  473 ( $\text{M}^+ + \text{H}$ ), 475 ( $\text{M}^+ + 3$ ), 272, 185; HRMS calcd for  $\text{C}_{22}\text{H}_{22}\text{N}_2\text{O}_5\text{Br}$  ( $\text{M}^+ + \text{H}$ ) 473.0712, found 473.0718. A single crystal was subjected to X-ray analysis.

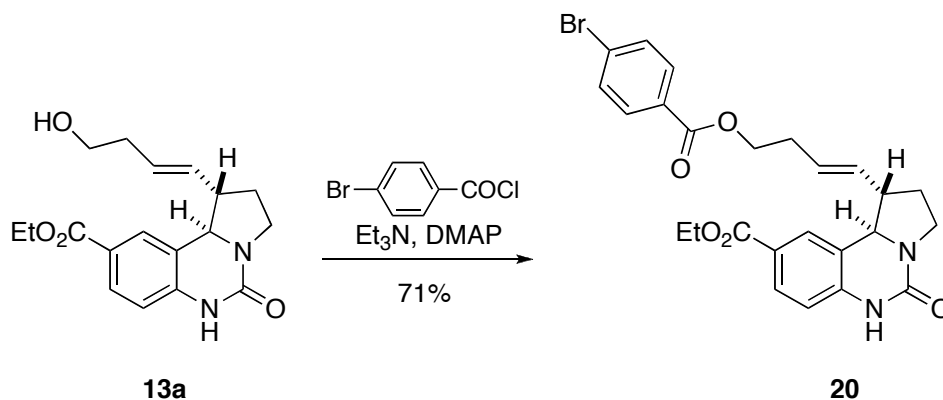

**(1*S*,10*bR*)-(E)-9-Carboethoxy-1-[4'-(4''-bromobenzoyloxy)but-1'-enyl]-2,3,6,10*b*-tetrahydro-1*H*-pyrrolo[1,2-*c*]quinazolin-5-one (20).** Prepared according to the general procedure for preparation of *p*-bromobenzoyl esters from **13a** (0.070 g, 0.20 mmol). Chromatography (1:1 hexanes:EtOAc to EtOAc) gave 0.069 g (71%) of a pale yellow solid that was crystallized from EtOAc/hexanes. Mp 166-168 °C;  $[\alpha]_{\text{D}} -27.2$  (*c* 0.25, CHCl<sub>3</sub>); <sup>1</sup>H NMR (400 MHz, CDCl<sub>3</sub>) δ 1.36 (t, *J* = 7.0 Hz, 3H), 1.88 (quintet, *J* = 10.2 Hz, 1H), 2.20 (m, 1H), 2.65 (q, *J* = 6.7 Hz, 2H), 3.01 (quintet, *J* = 8.9 Hz, 1H), 3.67 (m, 2H), 4.31 (q, *J* = 7.1 Hz, 2H), 4.46 (m, 3H), 5.75 (dd, *J* = 8.5, 15.5 Hz, 1H), 5.89 (td, *J* = 6.8, 15.4 Hz, 1H), 6.80 (d, *J* = 8.3 Hz, 1H), 7.54 (d, *J* = 8.4 Hz, 2H), 7.88 (t, *J* = 6.8 Hz, 3H), 8.11 (s, 1H), 8.42 (br, s, 1H); <sup>13</sup>C NMR (100.6 MHz, CDCl<sub>3</sub>) δ 14.8, 31.3, 32.5, 44.0, 49.6, 60.9, 61.2, 64.5, 114.0, 121.5, 124.4, 126.7, 128.5, 129.3, 129.5, 130.7, 131.5, 132.1, 133.5, 141.8, 153.3, 166.2, 166.4; IR (KBr) 1714, 1673, 1619, 1591 cm<sup>-1</sup>; MS (CI) 513 (*M*<sup>+</sup> + H), 515 (*M*<sup>+</sup> + 3), 232; HRMS calcd for C<sub>25</sub>H<sub>25</sub>N<sub>2</sub>O<sub>5</sub>Br (*M*<sup>+</sup>) 512.0947, found 512.0938. A single crystal was subjected to X-ray analysis.

**Scheme I.** Preparation of *p*-bromobenzoyl ester **31c**.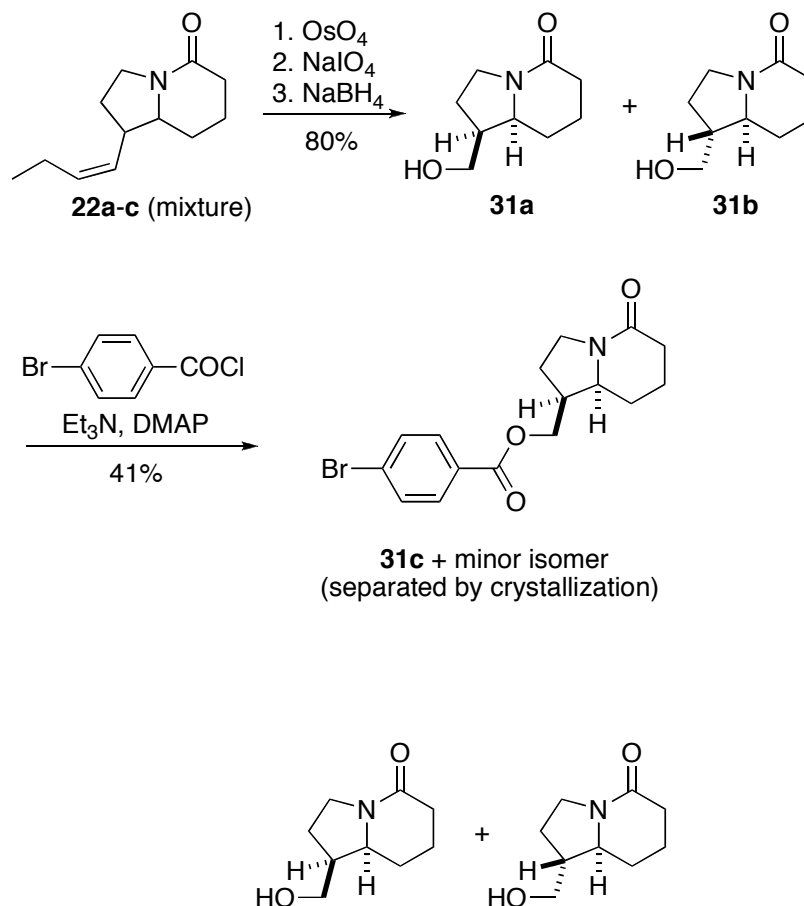**(1*S*,8*aS*)- and (1*R*,8*aS*)-1-Hydroxymethylhexahydroindolizin-5-one (31a,b).**

Prepared according to the general procedure for the oxidative cleavage/reduction reaction sequence using the purified product mixture containing **22a-c** (0.08 g, 0.41 mmol). Chromatography (20:1  $\text{CH}_2\text{Cl}_2$ :MeOH) gave 0.061 g (80% over 3 steps) of a colorless oil as a mixture of isomers. IR (film) 3380, 1608, 1470  $\text{cm}^{-1}$ ; MS (CI)  $m/z$  170 ( $\text{M}^+ + \text{H}$ ), 111, 82; HRMS calcd for  $\text{C}_9\text{H}_{16}\text{NO}_2$  ( $\text{M}^+ + \text{H}$ ) 170.1181, found 170.1188. Major isomer **(1*S*,8*aS*)-31a**:  $^1\text{H}$  NMR (400 MHz,  $\text{CDCl}_3$ )  $\delta$  1.48 (dq,  $J = 3.1, 11.9$  Hz, 1H), 1.69 (m, 1H), 1.91 (m, 1H), 1.97 (m, 3H), 2.27 (m, 1H), 2.42 (m, 2H), 2.49 (br, s, 1H), 3.45 (m, 2H), 3.55-3.74 (m, 3H);  $^{13}\text{C}$  NMR (100.6 MHz,  $\text{CDCl}_3$ )  $\delta$  21.3, 24.8, 28.5, 31.0, 43.4, 43.6, 60.8, 61.0, 169.4. Minor isomer **(1*R*,8*aS*)-31b** (diagnostic peaks only):  $^1\text{H}$  NMR

(400 MHz,  $\text{CDCl}_3$ )  $\delta$  1.28 (m, 1H), 3.24 (dt,  $J = 3.5, 10.3$  Hz, 1H);  $^{13}\text{C}$ NMR (100.6 MHz,  $\text{CDCl}_3$ )  $\delta$  20.9, 25.4, 44.0, 48.2, 61.5, 63.1.

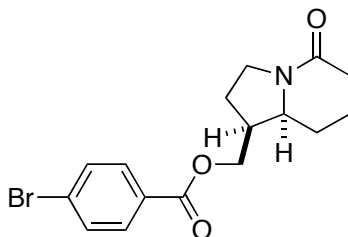

**(1S,8aS)-1-(4-Bromobenzoyloxymethyl)hexahydroindolizin-5-one (31c).**

Prepared according to the general procedure for preparation of *p*-bromobenzoyl esters using a mixture of **31a** and **31b** (0.060 g, 0.37 mmol). Chromatography (20:1  $\text{CH}_2\text{Cl}_2$  MeOH) gave 0.12 g (92%) of a white solid that was crystallized (EtOAc/hexanes) to afford 0.070 g (56%) of **31c** as a single isomer. Mp 85-87 °C;  $[\alpha]_{\text{D}} -2.7$  ( $c$  0.47,  $\text{CHCl}_3$ );  $^1\text{H}$  NMR (500 MHz,  $\text{CDCl}_3$ )  $\delta$  1.47 (dq,  $J = 2.9, 12.8$  Hz, 1H), 1.69 (m, 1H), 2.02 (m, 4H), 2.26 (m, 1H), 2.46 (dd,  $J = 6.1, 17.9$  Hz, 1H), 2.68 (quintet,  $J = 6.3$  Hz, 1H), 3.52 (dt,  $J = 1.8, 9.1$  Hz, 1H), 3.70 (m, 2H), 4.18 (dd,  $J = 6.6, 11.3$  Hz, 1H), 4.35 (dd,  $J = 6.5, 11.3$  Hz, 1H), 7.60 (d,  $J = 8.5$  Hz, 2H), 7.86 (d,  $J = 8.5$  Hz, 2H);  $^{13}\text{C}$  NMR (125.8 MHz,  $\text{CDCl}_3$ )  $\delta$  21.3, 25.0, 25.4, 31.1, 40.6, 43.4, 60.5, 63.9, 128.3, 128.6, 131.0, 131.8, 165.6, 169.1; IR (film) 1719, 1621, 1590  $\text{cm}^{-1}$ ; MS (CI)  $m/z$  352 ( $\text{M}^+ + 1$ ), 354 ( $\text{M}^+ + 3$ ), 151, 82; HRMS calcd for  $\text{C}_{16}\text{H}_{19}\text{NO}_3\text{Br}$  ( $\text{M}^+ + \text{H}$ ) 352.0548, found 352.0548. A single crystal was subjected to X-ray analysis.

**Scheme J. Preparation of *p*-bromobenzoyl ester **32a**.**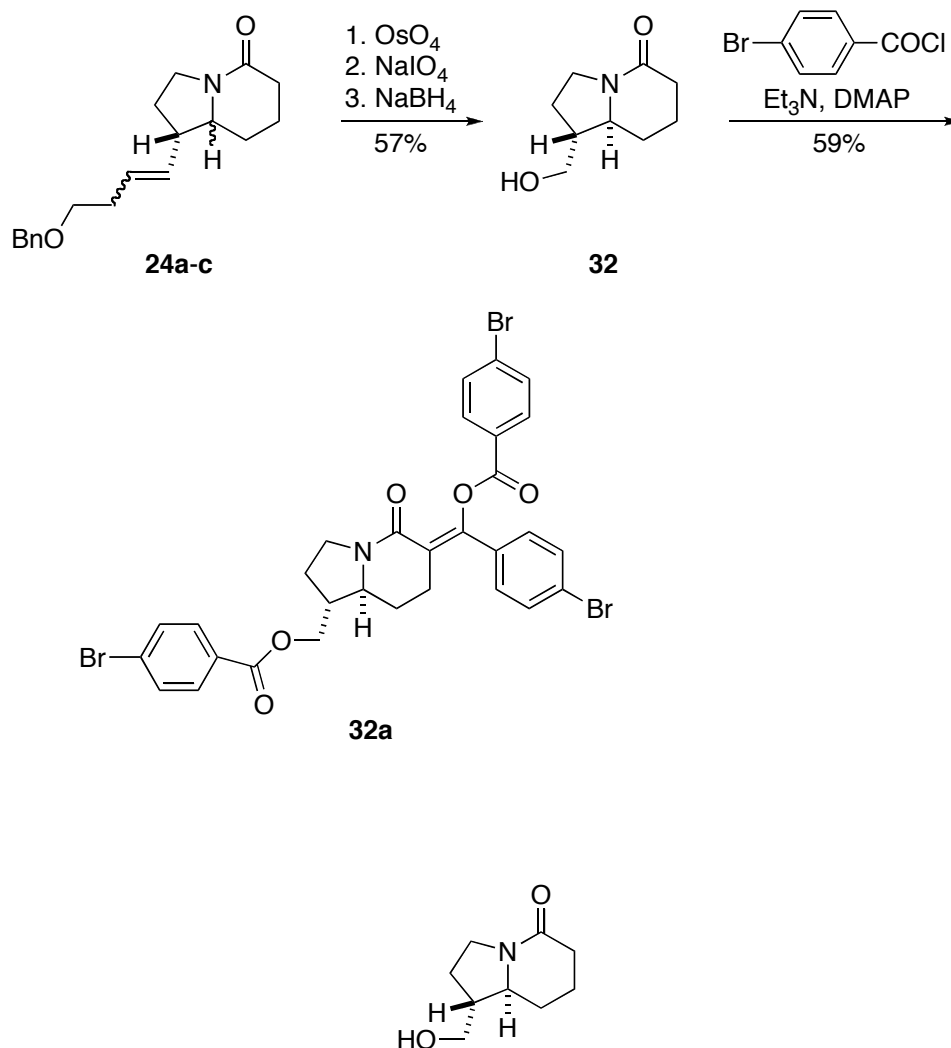

**(1*R*,8*aS*)-1-Hydroxymethylhexahydroindolizin-5-one (32).** Prepared according to the general procedure for the oxidative/reduction reaction sequence using the purified product mixture containing **24a-c** (0.22 g, 0.72 mmol). Chromatography (20:1  $\text{CH}_2\text{Cl}_2$ :MeOH) gave 0.11 g (86%) of a white solid that was crystallized (EtOAc/hexanes) to afford 0.068 g (57%) of **32** as a single isomer. Mp 114-116 °C;  $[\alpha]_{\text{D}} -26.4$  (*c* 0.55,  $\text{CHCl}_3$ );  $^1\text{H}$  NMR (500 MHz,  $\text{CDCl}_3$ )  $\delta$  1.32, (m, 1H), 1.67 (m, 3H), 1.98 (m, 2H), 2.04 (m, 1H), 2.30 (m, 2H), 2.47 (dd, *J* = 6.6, 18.0 Hz, 1H), 3.25 (dt, *J* = 3.4, 10.5 Hz, 1H), 3.51 (td, *J* = 1.5, 11.7 Hz, 1H), 3.66 (m, 1H), 3.77 (dd, *J* = 1.4, 5.4 Hz, 2H);  $^{13}\text{C}$  NMR (125.8 MHz,  $\text{CDCl}_3$ )  $\delta$  21.0, 25.4, 28.5, 31.0, 44.0, 48.2, 61.5, 63.2, 169.1; IR (film)

3396, 1614  $\text{cm}^{-1}$ ; MS (FAB+)  $m/z$  170 ( $\text{M}^+ + \text{H}$ ) 110; HRMS calcd for  $\text{C}_9\text{H}_{16}\text{NO}_2$  ( $\text{M}^+ + \text{H}$ ) 170.1181, found 170.1181.

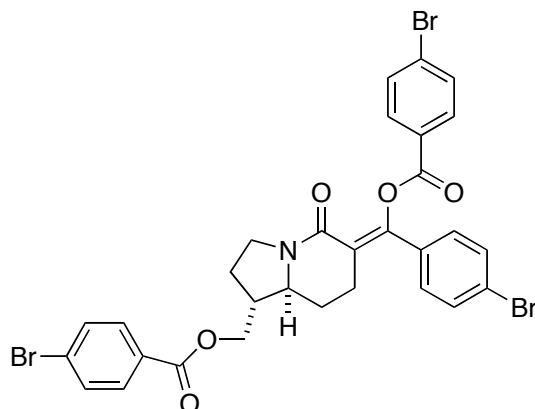

**(1R,8aS)-(Z)-6-[4'-Bromobenzoyloxy(4''-bromophenyl)methylene]-1-(4'-bromobenzoyloxymethyl)octahydroindolizin-5-one (32a).** Prepared according to the general procedure for preparation of *p*-bromobenzoyl esters from **32** (0.05 g, 0.30 mmol) with a modification of the workup: upon completion of the reaction, the reaction mixture was diluted with EtOAc (10 mL) and washed sequentially with cold 1M HCl ( $2 \times 10$  mL), followed by saturated aqueous  $\text{NaHCO}_3$  ( $2 \times 10$  mL) and brine ( $1 \times 10$  mL). The organic layer was dried ( $\text{Na}_2\text{SO}_4$ ), filtered, and concentrated. Chromatography (10:1 to 1:1 hexanes:EtOAc) gave 0.14 g (64%) of a white solid that was crystallized (EtOAc/hexanes) to afford 0.080 g (40%) of **32a**. Mp 186-187  $^\circ\text{C}$ ;  $[\alpha]_D -49.4$  ( $c$  0.35,  $\text{CHCl}_3$ );  $^1\text{H}$  NMR (500 MHz,  $\text{CDCl}_3$ )  $\delta$  1.55 (dq,  $J = 4.2, 13.3$  Hz, 1H), 1.74 (quintet,  $J = 9.9$  Hz, 1H), 2.16 (quintet,  $J = 6.4$  Hz, 1H), 2.26 (m, 2H), 2.60 (dt,  $J = 4.3, 13.6$  Hz, 1H), 2.79 (td,  $J = 3.5, 15.7$  Hz, 1H), 3.45 (dt,  $J = 3.1, 10.8$  Hz, 1H), 3.58 (m, 1H), 3.67 (m, 1H), 4.36 (dd,  $J = 6.7, 11.4$  Hz, 1H), 4.46 (dd,  $J = 5.1, 11.4$  Hz, 1H), 7.37 (d,  $J = 8.3$  Hz, 2H), 7.55 (d,  $J = 8.3$  Hz, 2H), 7.62 (dd,  $J = 4.1, 8.3$  Hz, 4H), 7.88 (d,  $J = 8.3$  Hz, 2H), 8.00 (d,  $J = 8.3$  Hz, 2H);  $^{13}\text{C}$  NMR (125.8 MHz,  $\text{CDCl}_3$ )  $\delta$  26.0, 27.4, 28.5, 44.5, 45.2, 61.7, 65.0, 118.4, 123.7, 128.4, 128.4, 128.5, 128.6, 130.3, 131.0, 131.6, 131.7, 131.7, 131.8, 134.1, 149.6, 161.4, 164.1, 165.5; IR (film) 1721, 1650, 1590  $\text{cm}^{-1}$ ; MS (FAB+)  $m/z$  716 ( $\text{M}^+ + \text{H}$ ), 718 ( $\text{M}^+ + 3$ ), 720 ( $\text{M}^+ + 5$ ), 722 ( $\text{M}^+ + 7$ ), 307, 154; HRMS calcd for  $\text{C}_{30}\text{H}_{25}\text{NO}_5\text{Br}_3$  ( $\text{M}^+ + \text{H}$ ) 715.9283, found 715.9296. A single crystal was subjected to X-ray analysis.

## Determination of Enantiomeric Purities

The enantiomeric ratios of the major products obtained in the cyclization reactions employing the enantiomerically enriched allylsilanes (*S*)-**1** and (*S*)-**2** were determined by chiral HPLC. In all cases, with the exception of **13a** (which was amenable to analysis without derivatization), the *p*-bromobenzoyl esters were required to facilitate separation of the component enantiomers in the racemic standards. All compound derivatizations for the purpose of HPLC analysis were carried out as described above with the exception that crystallization was avoided throughout to prevent alteration of the enantiomeric purity obtained in the original products.

**Table A.** Summary of er determination.

| Parent Compound                  | 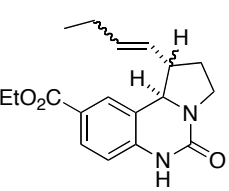<br><b>12a,b</b> | 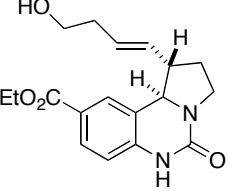<br><b>13a</b> | 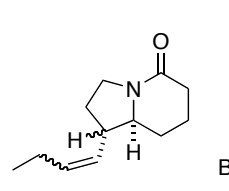<br><b>22a,b</b> | 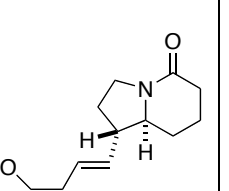<br><b>24a</b> |
|----------------------------------|----------------------------------------------------------------------------------------------------|--------------------------------------------------------------------------------------------------|-----------------------------------------------------------------------------------------------------|----------------------------------------------------------------------------------------------------|
| Derivative Analyzed <sup>a</sup> | 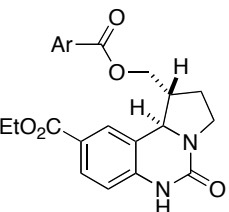                | N/A                                                                                              | 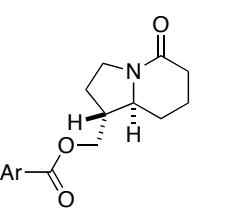                | 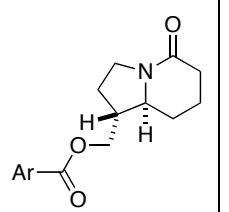              |
| chiral column <sup>b</sup>       | Chiralcel OD-H                                                                                     | Chirobiotic T                                                                                    | Chiralcel OD-H                                                                                      | Chiralcel OD-H                                                                                     |
| eluent <sup>c</sup>              | 5-10% IPA/hexanes gradient over 60 min                                                             | 30% EtOH/hexanes                                                                                 | 5-10% IPA/hexanes gradient over 60 min                                                              | 5-10% IPA/hexanes gradient over 60 min                                                             |
| RT <sup>d</sup> (major isomer)   | 33.4 min                                                                                           | 18.2 min                                                                                         | 37.9 min                                                                                            | 37.5 min                                                                                           |
| RT (minor isomer)                | 40.4 min                                                                                           | 20.9 min                                                                                         | 34.7 min                                                                                            | 35.4 min                                                                                           |
| er                               | 97.1:2.9<br>(minor diastereomer)                                                                   | 99:1                                                                                             | 93.3:6.7<br>(minor diastereomer)                                                                    | 97.0:3.0                                                                                           |

<sup>a</sup>Ar = *p*-bromophenyl; <sup>b</sup>Diacel Chemical; <sup>c</sup>IPA = 2-propanol, EtOH = ethanol; <sup>d</sup>RT = retention time

## References

1. Frank, K. E.; Aubé, J. *J. Org. Chem.* **2000**, *65*, 655-666.
2. Tamao, K.; Kawachi, A.; Nakagawa, Y.; Ito, Y. *J. Organomet. Chem.* **1994**, *473*, 29-34.
3. Breuilles, P.; Uguen, D. *Tetrahedron Lett.* **1998**, *39*, 3145-3148.
4. Vettel, S.; Vaupel, A.; Knochel, P. *J. Org. Chem.* **1996**, *61*, 7473-7481.
5. Johnson, W. S.; Wiedhaup, K.; Brady, S. F.; Olson, G. L. *J. Am. Chem. Soc.* **1974**, *96*, 3979-3984.
6. Burgstahler, A. W.; Weigel, L. W.; Sanders, M. E.; Shaefer, C. G.; Bell, W. J.; Vuturo, S. B. *J. Org. Chem.* **1977**, *42*, 566-568.
7. Sinha, S. C.; Sinha, S. C.; Keinan, E. *J. Org. Chem.* **1999**, *64*, 7067-7073.
8. Takimoto, M.; Shimizu, K.; Mori, M. *Org. Lett.* **2001**, *3*, 3345-3347.
9. Moffatt, J. G. *Org. Synth.* **1973**, *Coll. Vol. 5*, 242-244.
10. Gao, Y.; Hanson, R. M.; Klunder, J. M.; Ko, S. Y.; Masamune, H.; Sharpless, K. B. *J. Am. Chem. Soc.* **1987**, *109*, 5765-5780.
11. Dale, J. A.; Dull, D. L.; Mosher, H. S. *J. Org. Chem.* **1969**, *34*, 2543-2549.
12. Wipf, P.; Xu, W. *Org. Synth.* **1997**, *74*, 205-211.
13. Zhou, J.-C.; Cia, J.; Soloway, A. H.; Barth, R. F.; Adams, D. M.; Ji, W.; Tjarks, W. *J. Med. Chem.* **1999**, *42*, 7067-7073.
14. Suginome, M.; Matsumoto, A.; Ito, Y. *J. Am. Chem. Soc.* **1996**, *118*, 3061-3062.
15. Hiemstra, H.; Sno, M. H. A. M.; Vijn, R. J.; Speckamp, W. N. *J. Org. Chem.* **1985**, *50*, 4014-4020.
16. Hubert, J. C.; Wijnberg, J. B. P. A.; Speckamp, W. N. *Tetrahedron* **1975**, *31*, 1437-1441.
17. Schoemaker, H. E.; Dijkink, J.; Speckamp, W. N. *Tetrahedron* **1978**, *34*, 163-172.
18. Suginome, M.; Iwanami, T.; Ito, Y. *J. Org. Chem.* **1998**, *63*, 6096-6097.

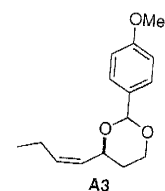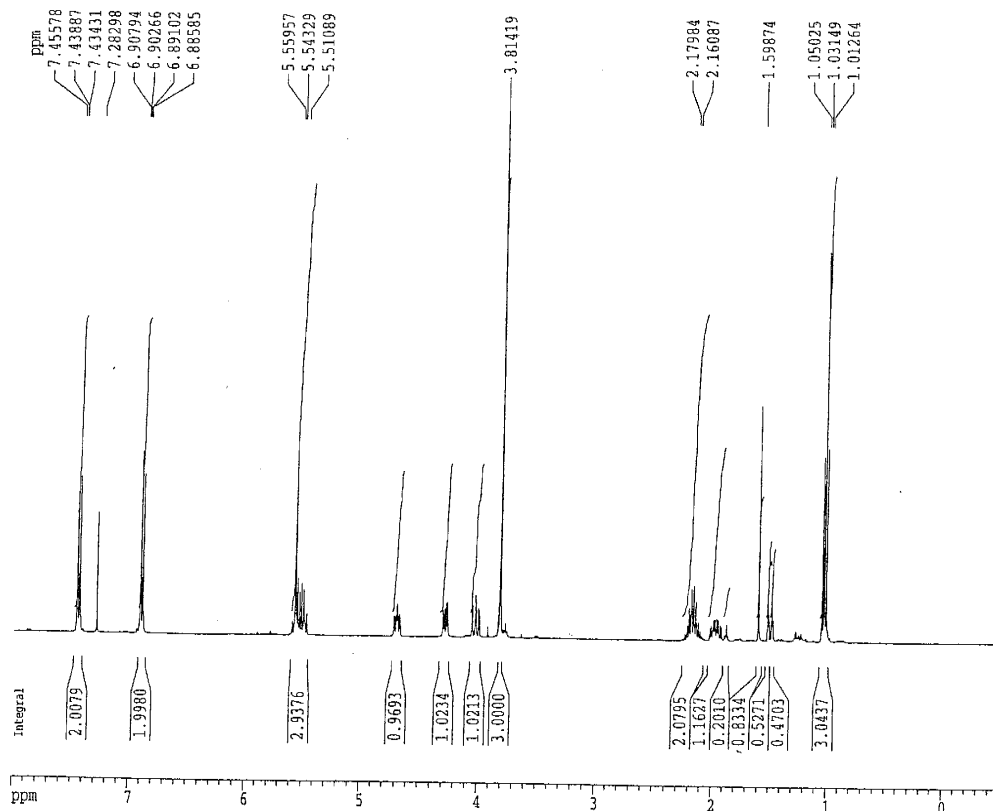

**F2 - Acquisition Parameters**

|         |                |
|---------|----------------|
| Date_   | 20011115       |
| Time    | 12.13          |
| INSTRUM | drx400         |
| PROBHD  | 5 mm Multinu   |
| PULPROG | zg30           |
| TD      | 32768          |
| SOLVENT | CDCl3          |
| NS      | 16             |
| DS      | 2              |
| SWH     | 4789.272 Hz    |
| FIDRES  | 0.146157 Hz    |
| AQ      | 1.4210291 sec  |
| RG      | 181            |
| DW      | 104.400 usec   |
| DE      | 4.50 usec      |
| TE      | 300.0 K        |
| DI      | 1.00000000 sec |

===== CHANNEL f1 =====

|      |                 |
|------|-----------------|
| NUC1 | 1H              |
| PL1  | 7.70 usec       |
| PL1  | -6.00 dB        |
| SFO1 | 400.1320007 MHz |

**F2 - Processing parameters**

|     |                 |
|-----|-----------------|
| SI  | 16384           |
| SP  | 400.1300000 MHz |
| WDW | EM              |
| SSB | 0               |
| LB  | 0.30 Hz         |
| GB  | 0               |
| PC  | 1.00            |

**1D NMR plot parameters**

|       |                 |
|-------|-----------------|
| CX    | 20.00 cm        |
| F1P   | 8.000 ppm       |
| F1    | 3201.04 Hz      |
| F2P   | -0.500 ppm      |
| F2    | -200.07 Hz      |
| PPMCM | 0.42500 ppm/cm  |
| HZCM  | 170.05525 Hz/cm |

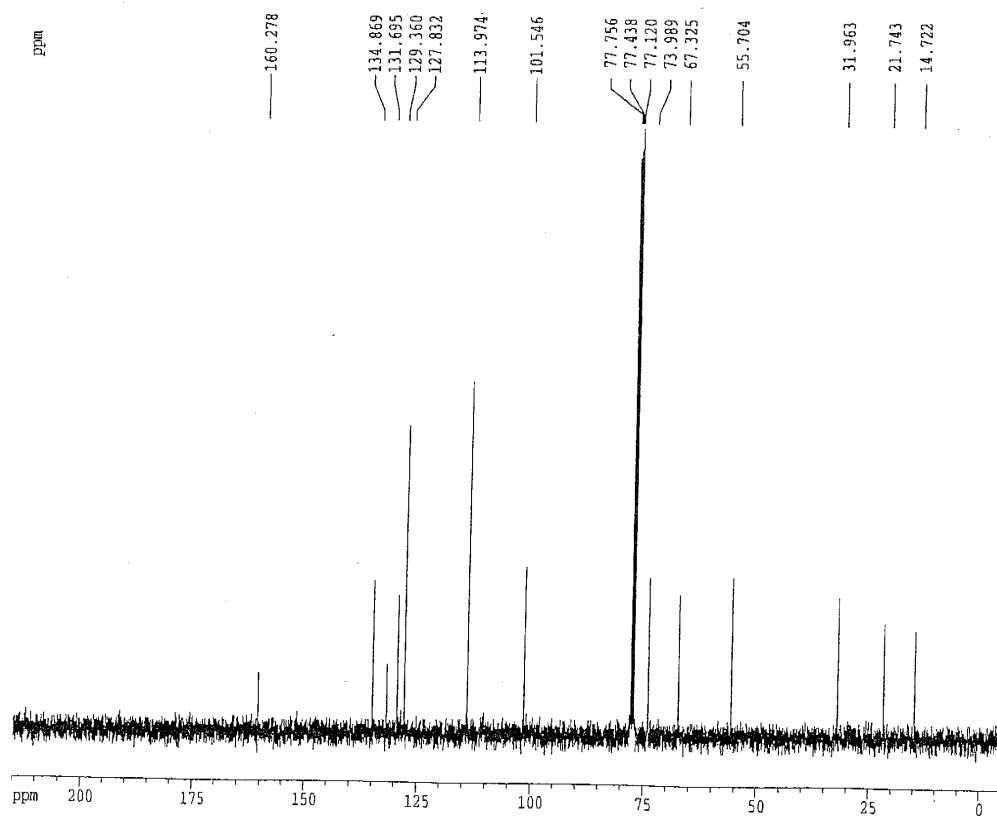

**Current Data Parameters**

|        |           |
|--------|-----------|
| NAME   | wj2-128,2 |
| EXPNO  | 2         |
| PROCNO | 1         |

**F2 - Acquisition Parameters**

|         |                |
|---------|----------------|
| Date_   | 20011115       |
| Time    | 12.20          |
| INSTRUM | drx400         |
| PROBHD  | 5 mm Multinu   |
| PULPROG | zgpg30         |
| TD      | 65536          |
| SOLVENT | CDCl3          |
| NS      | 223            |
| DS      | 2              |
| SWH     | 23140.148 Hz   |
| FIDRES  | 0.153213 Hz    |
| AQ      | 1.4156276 sec  |
| RG      | 4096           |
| DW      | 21.600 usec    |
| DE      | 4.50 usec      |
| TE      | 300.0 K        |
| DI      | 0.05000000 sec |
| di1     | 0.03000000 sec |
| di2     | 0.00002000 sec |

===== CHANNEL f1 =====

|      |                 |
|------|-----------------|
| NUC1 | 13C             |
| PL1  | 12.30 usec      |
| PL1  | 2.00 dB         |
| SFO1 | 100.6232933 MHz |

===== CHANNEL f2 =====

|         |                 |
|---------|-----------------|
| CPDPRG2 | waltz16         |
| NUC2    | 1H              |
| PCPD2   | 100.00 usec     |
| PL2     | 0.00 dB         |
| PL12    | 18.00 dB        |
| PL13    | 18.00 dB        |
| SFO2    | 400.1316005 MHz |

**F2 - Processing parameters**

|     |                 |
|-----|-----------------|
| SI  | 32768           |
| SP  | 100.6127290 MHz |
| WDW | EM              |
| SSB | 0               |
| LB  | 1.00 Hz         |
| GB  | 0               |
| PC  | 1.40            |

**1D NMR plot parameters**

|       |                  |
|-------|------------------|
| CX    | 20.00 cm         |
| F1P   | 215.000 ppm      |
| F1    | 21631.74 Hz      |
| F2P   | -5.000 ppm       |
| F2    | -503.06 Hz       |
| PPMCM | 11.00000 ppm/cm  |
| HZCM  | 1106.73999 Hz/cm |

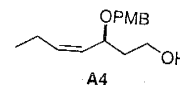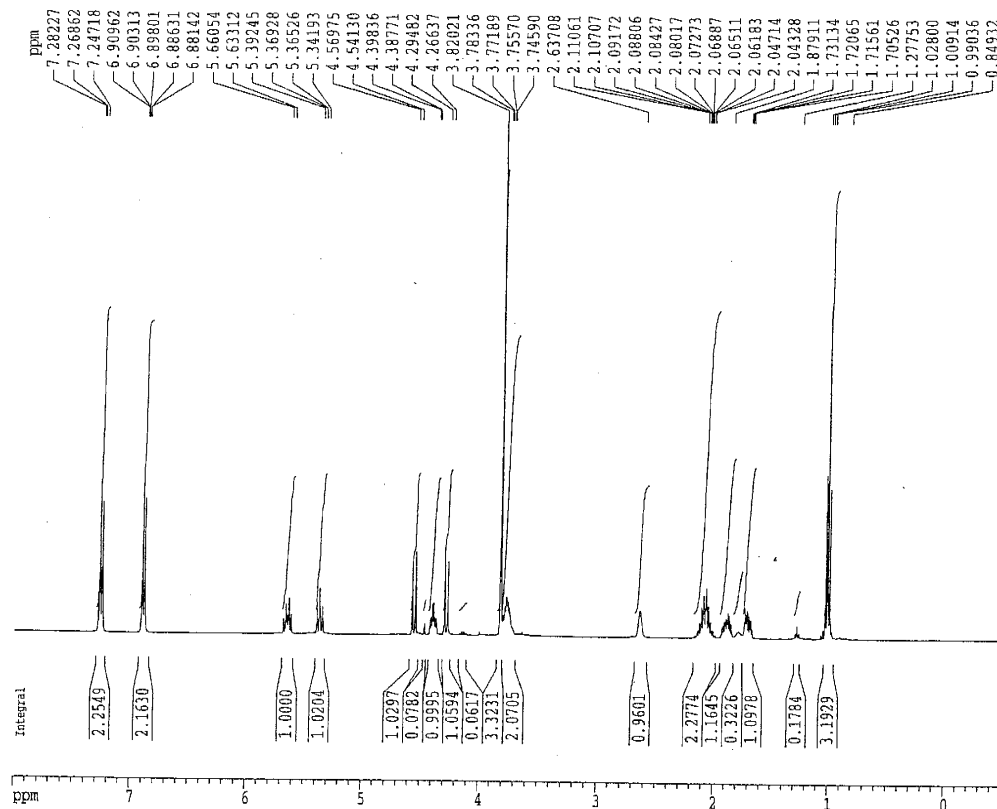

Current Data Parameters  
NAME wj2-132  
EXPNO 1  
PROCNO 1

F2 - Acquisition Parameters  
Date\_ 20011117  
Time 15.54  
INSTRUM drx400  
PROBHD 5 mm Multinu  
PULPROG zg30  
TD 32768  
SOLVENT CDCl3  
NS 16  
DS 2  
SWH 4789.272 Hz  
FIDRES 0.146157 Hz  
AQ 3.4210291 sec  
RG 101.6  
RW 104.400 usec  
DE 4.50 usec  
TE 300.0 K  
D1 1.00000000 sec

===== CHANNEL f1 =====  
NUC1 1H  
P1 7.70 usec  
PL1 -5.00 dB  
SFO1 400.1320007 MHz

F2 - Processing parameters  
SI 16384  
SF 400.1300000 MHz  
WDW EM  
SSB 0  
LB 0.30 Hz  
GB 0  
PC 1.00

1D NMR plot parameters  
CX 20.00 cm  
FIP 8.000 ppm  
F1 3201.04 Hz  
F2P -0.500 ppm  
F2 -200.07 Hz  
PFMCM 0.42500 ppm/cm  
HZCM 170.05525 Hz/cm

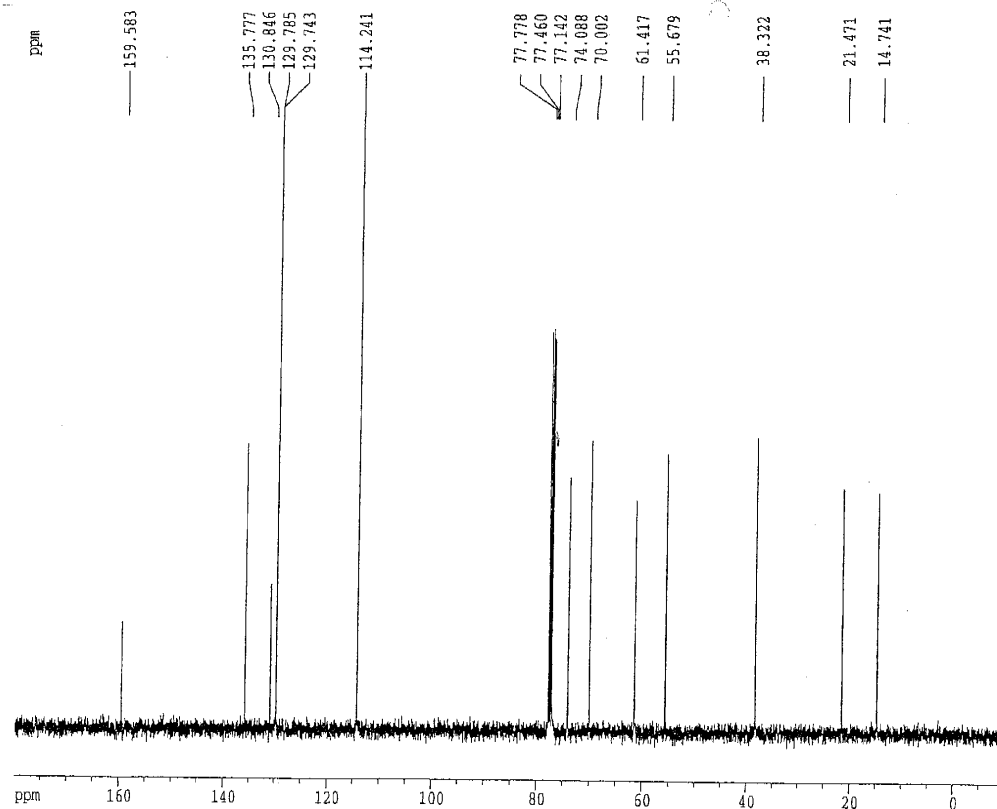

Current Data Parameters  
NAME wj2-132  
EXPNO 2  
PROCNO 1

F2 - Acquisition Parameters  
Date\_ 20011117  
Time 15.59  
INSTRUM drx400  
PROBHD 5 mm Multinu  
PULPROG zgpg30  
TD 65536  
SOLVENT CDCl3  
NS 215  
DS 2  
SWH 23148.148 Hz  
FIDRES 0.353213 Hz  
AQ 1.4156276 sec  
RG 8192  
RW 21.600 usec  
DE 4.50 usec  
TE 300.0 K  
D1 0.05000000 sec  
d11 0.03000000 sec  
d12 0.00002000 sec

===== CHANNEL f1 =====  
NUC1 13C  
P1 12.30 usec  
PL1 2.00 dB  
SFO1 100.6232933 MHz

===== CHANNEL f2 =====  
CPDPRG2 waltz16  
NUC2 1H  
PCPD2 100.30 usec  
PL2 0.00 dB  
PL12 18.00 dB  
PL13 18.00 dB  
SFO2 400.1316005 MHz

F2 - Processing parameters  
SI 32768  
SF 100.6127290 MHz  
WDW EM  
SSB 0  
LB 1.00 Hz  
GB 0  
PC 1.40

1D NMR plot parameters  
CX 20.00 cm  
FIP 180.000 ppm  
F1 18110.29 Hz  
F2P -10.036 ppm  
F2 -1009.74 Hz  
PFMCM 9.50179 ppm/cm  
HZCM 956.00128 Hz/cm

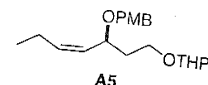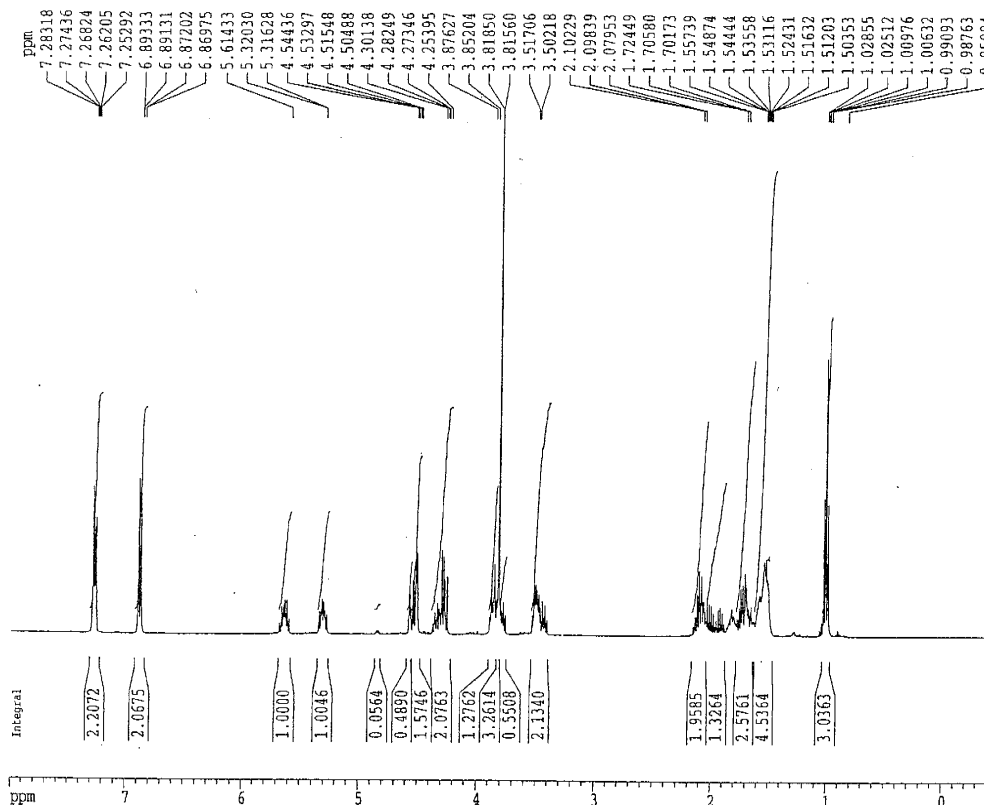

# Current Data Parameters

NAME wj2-134  
EXNO 1  
PROCNO 1

F2 - Acquisition Parameters  
Date\_ 20011126  
Time 10.25  
INSTRUM drx400  
PROBHD 5 mm Multinu  
PULPROG zg30  
TD 32768  
SOLVENT CDCl3  
NS 16  
DS 2  
SWH 4789.272 Hz  
FIDRES 0.146157 Hz  
AQ 3.4210291 sec  
RG 64  
DW 104.400 usec  
DE 4.50 usec  
TE 300.0 K  
D1 1.00000000 sec

===== CHANNEL f1 =====  
NUC1 1H  
P1 7.70 usec  
PL1 -6.00 dB  
SFO1 400.1320007 MHz

F2 - Processing parameters  
SI 16384  
SF 400.1300000 MHz  
WDW EM  
SSB 0  
LB 0.30 Hz  
GB 0  
PC 1.00

1D NMR plot parameters  
CX 20.00 cm  
F1P 8.000 ppm  
F1 3201.04 Hz  
F2P -0.500 ppm  
F2 -200.07 Hz  
PPMCM 0.42500 ppm/cm  
HZCM 170.05525 Hz/cm

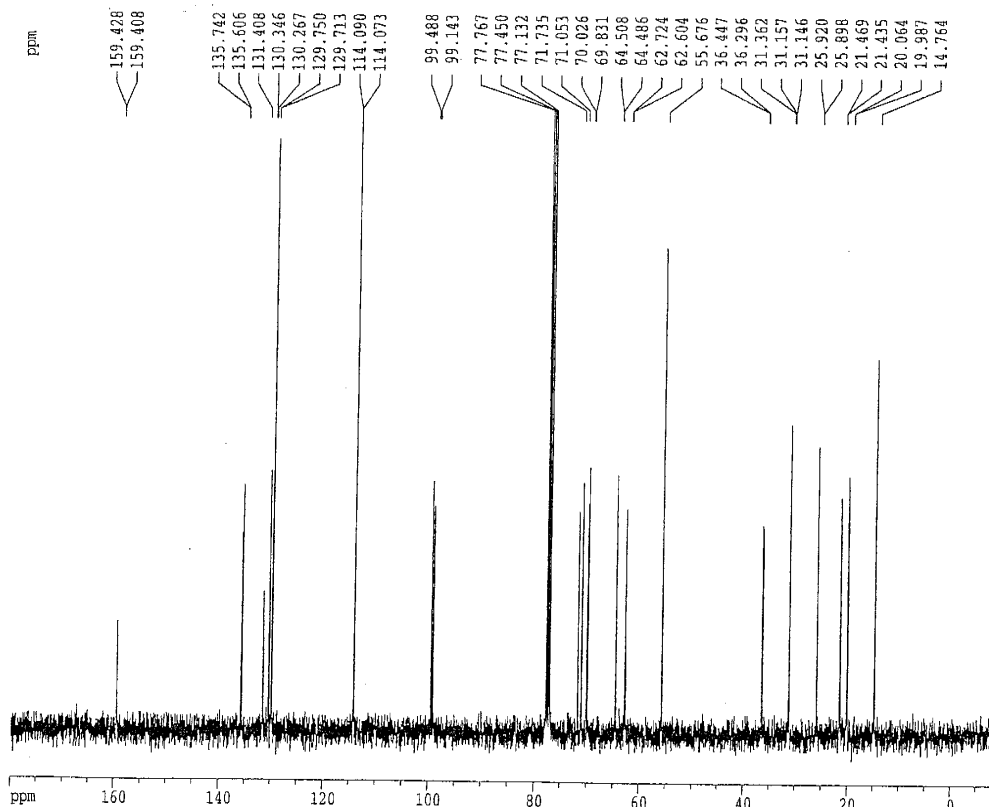

# Current Data Parameters

NAME wj2-134  
EXNO 2  
PROCNO 1

F2 - Acquisition Parameters  
Date\_ 20011126  
Time 10.31  
INSTRUM drx400  
PROBHD 5 mm Multinu  
PULPROG zgpg30  
TD 65536  
SOLVENT CDCl3  
NS 249  
DS 2  
SWH 23148.149 Hz  
FIDRES 0.353213 Hz  
AQ 1.4156276 sec  
RG 1024  
DW 21.600 usec  
DE 4.50 usec  
TE 300.0 K  
D1 0.0500000 sec  
D11 0.0300000 sec  
D12 0.00002000 sec

===== CHANNEL f1 =====  
NUC1 13C  
P1 12.30 usec  
PL1 2.00 dB  
SFO1 100.6232933 MHz

===== CHANNEL f2 =====  
CPDPRG2 waltz16  
NUC2 1H  
PCPD2 100.00 usec  
PL2 0.00 dB  
PL12 18.00 dB  
PL13 18.00 dB  
SFO2 400.1316005 MHz

F2 - Processing parameters  
SI 32768  
SF 100.6127220 MHz  
WDW EM  
SSB 0  
LB 1.00 Hz  
GB 0  
PC 1.40

1D NMR plot parameters  
CX 20.00 cm  
F1P 180.000 ppm  
F1 18110.29 Hz  
F2P -10.036 ppm  
F2 -1009.73 Hz  
PPMCM 9.50179 ppm/cm  
HZCM 955.00128 Hz/cm

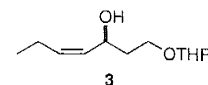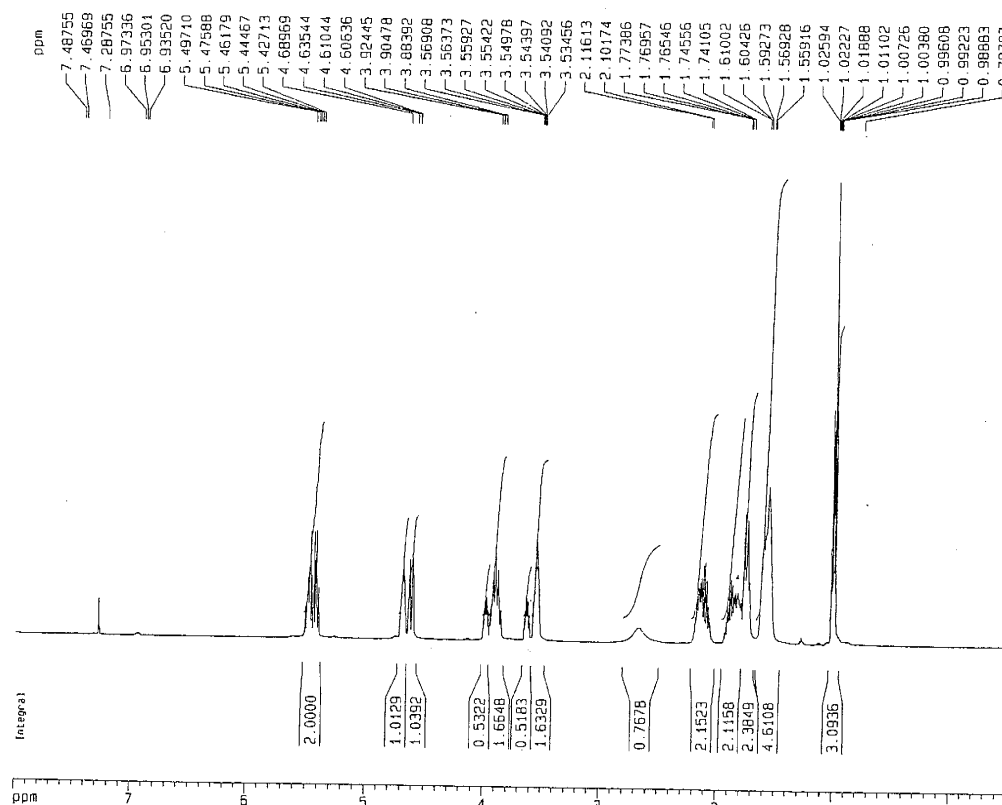

Current Data Parameters  
NAME wj2-251  
EXPNO 1  
PROCNO 1

F2 - Acquisition Parameters  
Date\_ 20020417  
Time 20.56  
INSTRUM spect  
PROBHD 5 mm BBO 50-1H  
PULPROG zg30  
TD 32768  
SOLVENT CDCl3  
NS 15  
DS 2  
SWH 6009.615 Hz  
FIDRES 0.193390 Hz  
AQ 2.7264309 sec  
RG 203.2  
CW 83.200 usec  
DE 6.00 usec  
TE 300.0 K  
D1 0.03000000 sec

\*\*\*\*\* CHANNEL f1 \*\*\*\*\*  
NUC1 1H  
P1 7.70 usec  
PL1 -4.00 dB  
SFO1 500.130005 MHz

F1 - Acquisition parameters  
NUC 1  
TD 256  
SFO1 500.1325 MHz  
FIDRES 23.475060 Hz  
SW 12.016 ppm

F2 - Processing parameters  
SI 32768  
SF 500.1300000 MHz  
WDW EM  
SSB 0  
LB 0.30 Hz  
GB 0  
PC 1.00

F1 - Processing parameters  
SI 1924  
MC2 OF  
SF 500.1300000 MHz  
WDW OSTINE  
SSB 0  
LB 0.30 Hz  
GB 0

1D NMR plot parameters  
CX 20.00 cm  
CY 8.000 ppm  
F1P 4001.04 Hz  
F2P -0.500 ppm  
F2 -950.07 Hz  
PRMCH 0.42500 ppm/cm  
HSCN 212.55925 Hz/cm

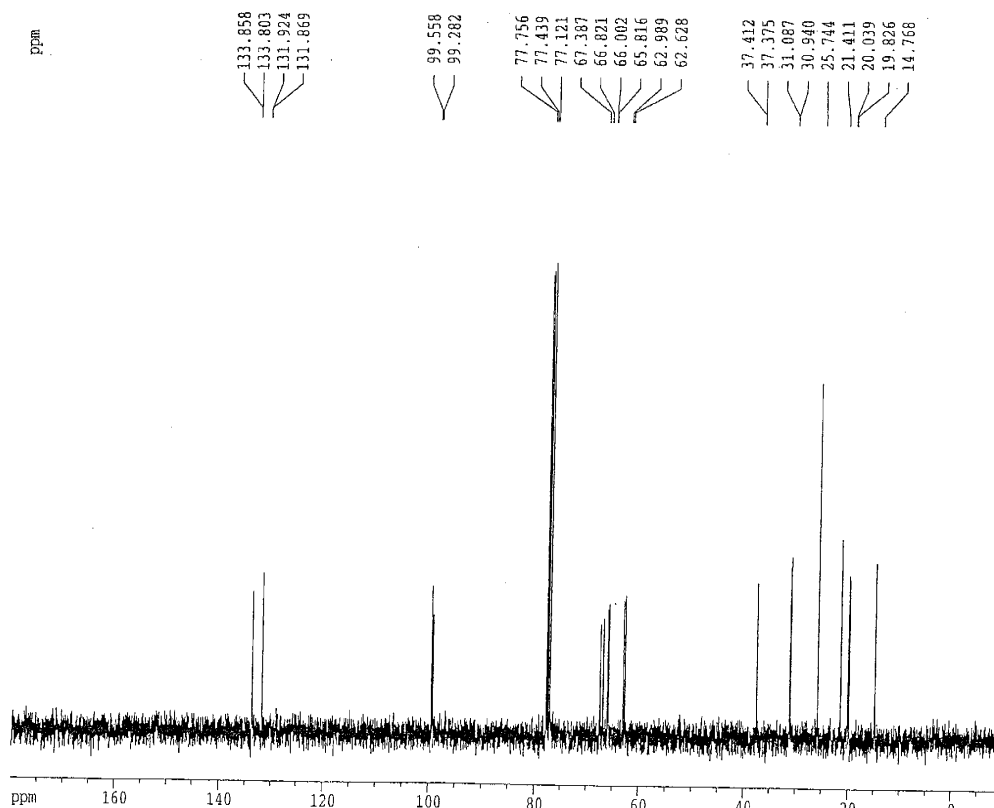

Current Data Parameters  
NAME wj2-214  
EXPNO 2  
PROCNO 1

F2 - Acquisition Parameters  
Date\_ 20020304  
Time 13.03  
INSTRUM drx400  
PROBHD 5 mm Multinu  
PULPROG zgpg30  
TD 65536  
SOLVENT CDCl3  
NS 100  
DS 2  
SWH 23148.148 Hz  
FIDRES 0.353213 Hz  
AQ 1.4156276 sec  
RG 3649.1  
CW 21.600 usec  
DE 4.50 usec  
TE 100.0 K  
D1 0.05000000 sec  
d11 0.03000000 sec  
d12 0.00002000 sec

\*\*\*\*\* CHANNEL f1 \*\*\*\*\*  
NUC1 13C  
P1 12.30 usec  
PL1 2.00 dB  
SFO1 100.6232933 MHz

\*\*\*\*\* CHANNEL f2 \*\*\*\*\*  
CPDPRG2 waltz16  
NUC2 1H  
PCPD2 100.00 usec  
PL2 0.00 dB  
PL12 18.00 dB  
PL13 18.00 dB  
SFO2 400.1316005 MHz

F2 - Processing parameters  
SI 32768  
SF 100.6127290 MHz  
WDW EM  
SSB 0  
LB 1.00 Hz  
GB 0  
PC 1.40

1D NMR plot parameters  
CX 20.00 cm  
F1P 180.000 ppm  
F1 18110.29 Hz  
F2P -10.036 ppm  
F2 -1009.74 Hz  
PRMCH 9.50179 ppm/cm  
HSCN 956.00128 Hz/cm

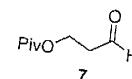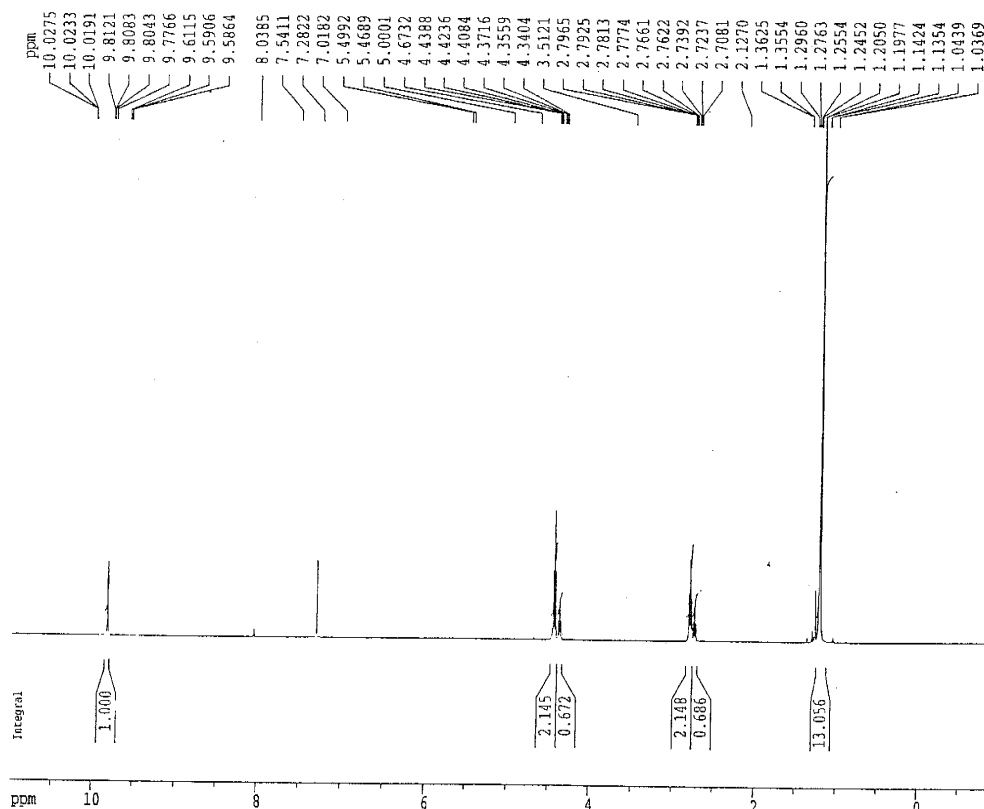

Current Data Parameters  
NAME wj2-145  
EXPNO 1  
PROCNO 1

F2 - Acquisition Parameters  
Date\_ 20011206  
Time 20.44  
INSTRUM drx400  
PROBHD 5 mm Multinu  
PULPROG zg30  
TD 32768  
SOLVENT CDCl3  
NS 16  
DS 2  
SWH 4789.272 Hz  
FIDRES 0.146157 Hz  
AQ 3.4210291 sec  
RG 161.3  
DW 104.400 usec  
DE 4.50 usec  
TE 300.0 K  
D1 1.00000000 sec

\*\*\*\*\* CHANNEL f1 \*\*\*\*\*  
NUC1 1H  
P1 7.70 usec  
PL1 -6.00 dB  
SFO1 400.1320007 MHz

F2 - Processing parameters  
SI 16384  
SF 400.1300000 MHz  
WDW EM  
SSB 0  
LB 0.30 Hz  
GB 0  
PC 1.00

1D NMR plot parameters  
CX 20.00 cm  
F1P 10.985 ppm  
F1 4395.28 Hz  
F2P -0.985 ppm  
F2 -391.99 Hz  
PPMCH 0.59846 ppm/cm  
HZCM 239.46359 Hz/cm

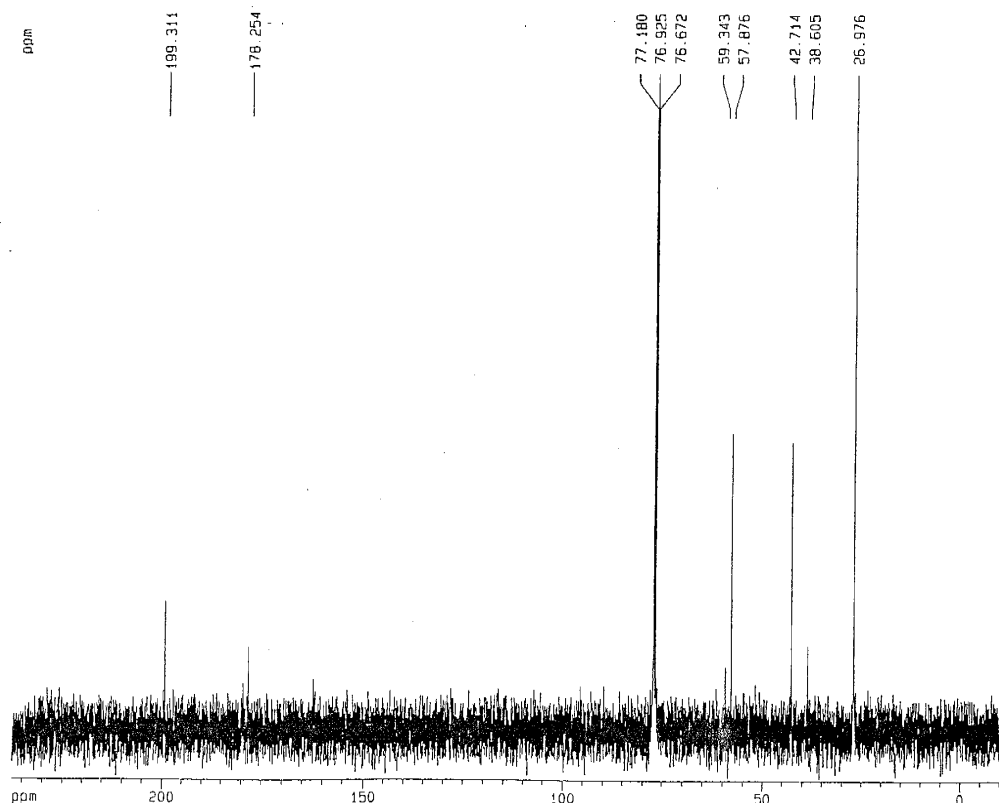

Current Data Parameters  
NAME wj2-145  
EXPNO 2  
PROCNO 1

F2 - Acquisition Parameters  
Date\_ 20020227  
Time 18.30  
INSTRUM spect  
PROBHD 5 mm BBO BB-1H  
PULPROG zgpg30  
TD 65536  
SOLVENT CDCl3  
NS 313  
DS 4  
SWH 31446.541 Hz  
FIDRES 0.478026 Hz  
AQ 1.0420083 sec  
RG 7296.2  
DW 15.500 usec  
DE 6.00 usec  
TE 300.0 K  
D1 0.1000000 sec  
d11 0.0300000 sec  
d12 0.0000000 sec

\*\*\*\*\* CHANNEL 1 \*\*\*\*\*  
NUC1 13C  
P1 6.50 usec  
PL1 5.00 dB  
SFO1 125.7719472 MHz

\*\*\*\*\* CHANNEL 2 \*\*\*\*\*  
CPDPRG2 waltz16  
NUC2 1H  
PCPD2 95.00 usec  
PL2 -4.00 dB  
PL12 19.00 dB  
PL13 30.00 dB  
SFO2 500.1325000 MHz

F1 - Acquisition Parameters  
N00 2  
TD 256  
SFO1 500.1325 MHz  
FIDRES 23.475080 Hz  
SW 12.016 ppm

F2 - Processing parameters  
SI 65536  
SF 125.7570000 MHz  
WDW EM  
SSB 0  
LB 1.00 Hz  
GB 0  
PC 1.40

F1 - Processing parameters  
SI 1024  
N00 2  
N01 500.1320000 MHz  
WDW EM  
SSB 0  
LB 0.30 Hz  
GB 0

1D NMR plot parameters  
CX 20.00 cm  
C1 0.00 cm  
F1P 237.517 ppm  
F1 29869.63 Hz  
F2P -19.338 ppm  
F2 -1976.91 Hz  
PPMCH 12.50282 ppm/cm  
HZCM 1572.32702 Hz/cm

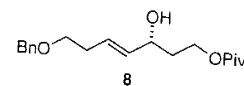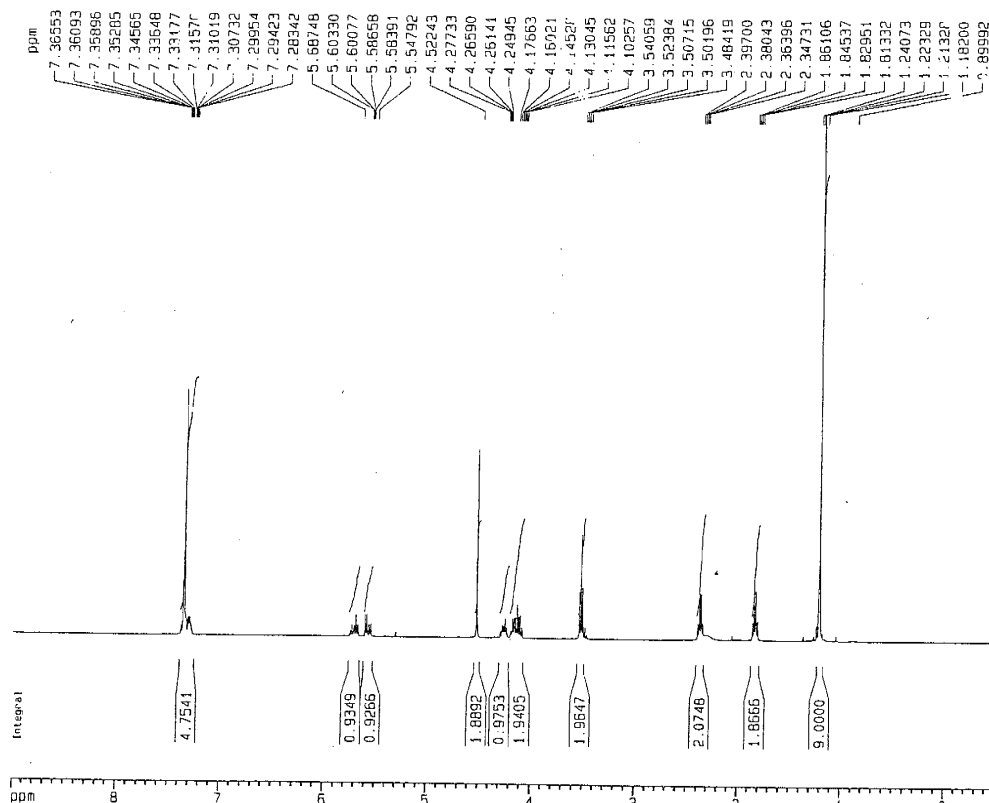

Current Data Parameters  
 NAME wj1-145  
 EXPNO 1  
 PROCNO 1

F2 - Acquisition Parameters  
 Date\_ 1000515  
 Time 12.23  
 INSTRUM 5 mm Multinu  
 PROBHD zgpg30  
 PULPROG zgpg30  
 TD 32768  
 SOLVENT CDCl3  
 NS 16  
 DS 2  
 SWH 4789.272 Hz  
 FIDRES 0.146157 Hz  
 AQ 3.4210291 sec  
 RG 64  
 DM 104.400 usec  
 DE 4.50 usec  
 TE 300.0 K  
 D1 1.00000000 sec  
 P1 7.70 usec  
 DE 4.50 usec  
 SFO1 400.1320007 MHz  
 NUC1 1H  
 PL1 -6.00 dB

F2 - Processing parameters  
 SI 16384  
 SF 400.1300000 MHz  
 WDW EM  
 SSB 0  
 LB 0.30 Hz  
 GB 0  
 PC 1.00

1D NMR plot parameters  
 CX 20.00 cm  
 FIP 9.000 ppm  
 F1 3601.17 Hz  
 F2P -0.500 ppm  
 F2 -200.07 Hz  
 PRMCH 0.47500 ppm/cm  
 HZCH 190.06175 Hz/cm

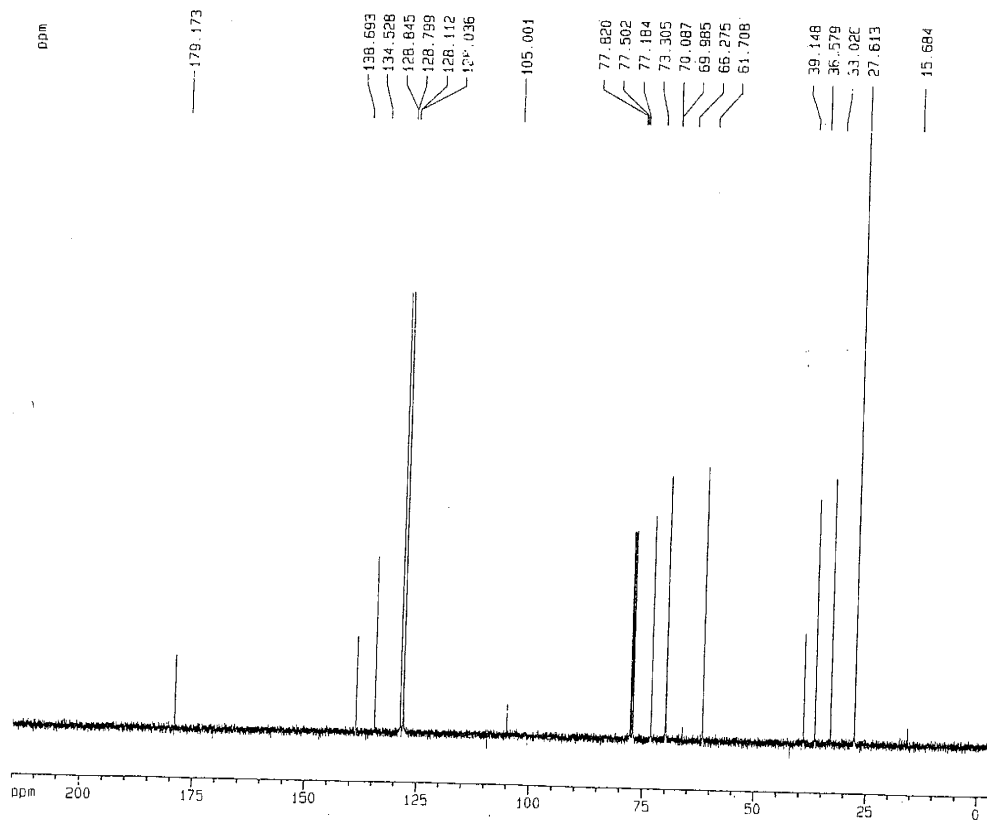

Current Data Parameters  
 NAME wj1-145c  
 EXPNO 1  
 PROCNO 1

F2 - Acquisition Parameters  
 Date\_ 1000515  
 Time 12.12  
 INSTRUM 5 mm Multinu  
 PROBHD zgpg30  
 PULPROG zgpg30  
 TD 65536  
 SOLVENT CDCl3  
 NS 239  
 DS 2  
 SWH 23148.146 Hz  
 FIDRES 0.353213 Hz  
 AQ 1.4156276 sec  
 RG 2048  
 DM 21.600 usec  
 DE 4.50 usec  
 TE 300 K  
 d11 0.03000000 sec  
 d12 0.00000000 sec  
 PL13 1.00 dB  
 D1 0.05000000 sec  
 CPOPRG2 waltz16  
 PCPD2 100.00 usec  
 SFO2 400.1315005 MHz  
 NUC2 1H  
 PL2 -6.00 dB  
 PL12 18.00 dB  
 P1 6.90 usec  
 DE 4.50 usec  
 SFO1 100.6252933 MHz  
 NUC1 13C  
 PL1 -6.00 dB

F2 - Processing parameters  
 SI 32768  
 SF 100.6127290 MHz  
 WDW EM  
 SSB 0  
 LB 1.00 Hz  
 GB 0  
 PC 1.40

1D NMR plot parameters  
 CX 20.00 cm  
 FIP 215.000 ppm  
 F1 21631.74 Hz  
 F2P -5.000 ppm  
 F2 -503.06 Hz  
 PRMCH 11.00000 ppm/cm  
 HZCH 1106.73999 Hz/cm

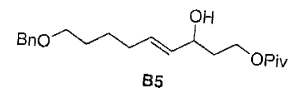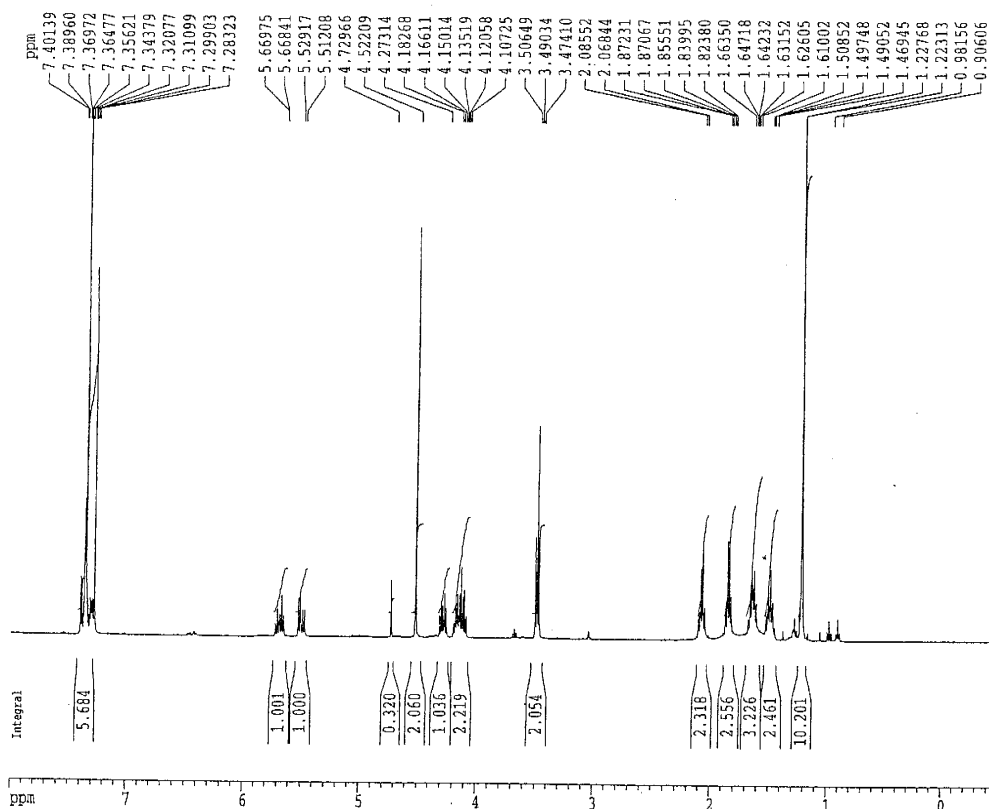

Current Data Parameters  
 NAME wj4-41  
 EXPNO 1  
 PROCNO 1

F2 - Acquisition Parameters  
 Date\_ 20030709  
 Time 12.22  
 INSTRUM drx400  
 PROBRD 5 mm Multinucl  
 PULPROG zg30  
 TD 32768  
 SOLVENT CDCl3  
 NS 16  
 DS 2  
 SWH 4789.272 Hz  
 FIDRES 0.146157 Hz  
 AQ 3.4210291 sec  
 RG 256  
 DW 104.400 usec  
 DE 4.50 usec  
 TE 300.0 K  
 D1 1.00000000 sec

===== CHANNEL f1 =====  
 NUC1 1H  
 P1 7.70 usec  
 PL1 -5.00 dB  
 SFO1 400.1320007 MHz

F2 - Processing parameters  
 SI 16384  
 SF 400.1300000 MHz  
 WDW EM  
 SSB 0  
 LB 0.30 Hz  
 GB 0  
 PC 1.00

1D NMR plot parameters  
 CX 20.00 cm  
 CY 0.00 cm  
 F1P 8.000 ppm  
 F1 3201.04 Hz  
 F2P -0.500 ppm  
 F2 -200.07 Hz  
 PPMCM 0.42500 ppm/cm  
 HZCM 170.95525 Hz/cm

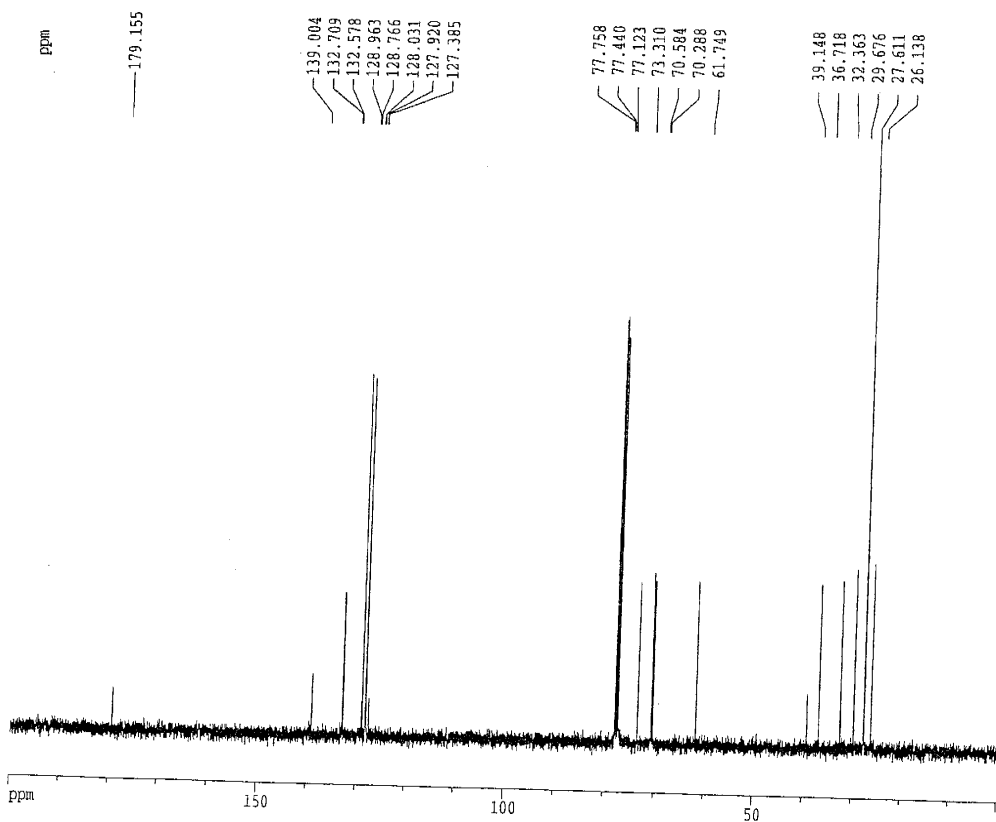

Current Data Parameters  
 NAME wj4-41  
 EXPNO 2  
 PROCNO 1

F2 - Acquisition Parameters  
 Date\_ 20030709  
 Time 12.29  
 INSTRUM drx400  
 PROBRD 5 mm Multinucl  
 PULPROG zgpg30  
 TD 65536  
 SOLVENT CDCl3  
 NS 375  
 DS 2  
 SWH 23148.148 Hz  
 FIDRES 0.353213 Hz  
 AQ 1.4156276 sec  
 RG 32768  
 DW 21.600 usec  
 DE 4.50 usec  
 TE 300.0 K  
 D1 0.05000000 sec  
 d11 0.03000000 sec  
 d12 0.00002000 sec

===== CHANNEL f1 =====  
 NUC1 13C  
 P1 12.30 usec  
 PL1 2.00 dB  
 SFO1 100.6232933 MHz

===== CHANNEL f2 =====  
 CPOPRG2 waltz16  
 NUC2 1H  
 PCPD2 100.00 usec  
 PL2 0.00 dB  
 PL12 18.00 dB  
 PL13 18.00 dB  
 SFO2 400.1316005 MHz

F2 - Processing parameters  
 SI 32768  
 SF 100.6127290 MHz  
 WDW EM  
 SSB 0  
 LB 1.00 Hz  
 GB 0  
 PC 1.40

1D NMR plot parameters  
 CX 20.00 cm  
 CY 0.00 cm  
 F1P 200.000 ppm  
 F1 20122.55 Hz  
 F2P -0.500 ppm  
 F2 -50.31 Hz  
 PPMCM 19.02500 ppm/cm  
 HZCM 1009.64264 Hz/cm

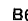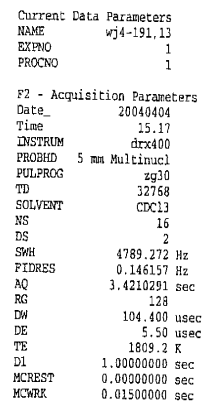

```
===== CHANNEL f1 =====
NUC1          1H
P1             7.70 usec
PL1           -6.00 dB
SFO1         400.1320007 MHz
```

```
F2 - Processing parameters
SI          16384
SF          400.1300000 MHz
WDW          EM
SSB          0
LB          0.30 Hz
GB          0
PC          1.00
```

```

1D NMR plot parameters
CX          20.00 cm
CY           0.00 cm
F1P          8.000 ppm
F1          3201.04 Hz
F2P          -0.500 ppm
F2          -200.07 Hz
PPMCM        0.42500 ppm/cm
HZCM         170.05525 Hz/cm

```

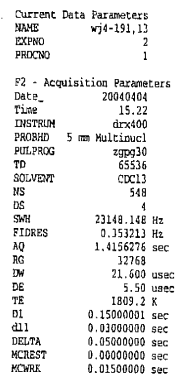

```
===== CHANNEL f1 =====
NUC1          13C
P1             12.30 usec
PL1            2.00 dB
SF01          100.6232933 MHz
```

```
===== CHANNEL f2 =====
CPDPRG2      waltz16
NUC2          1H
PCPD2        100.00 usec
PL2           0.00 dB
PL12          18.00 dB
PL13          18.00 dB
SFO2         400.1316005 MHz
```

```
F2 - Processing parameters
SI                65536
SF                100.6127290 MHz
WDW               EM
SSB               0
LB                1.00 Hz
GB               0
PC               1.40
```

```

1D NMR plot parameters
CX          20.00 cm
CY          0.00 cm
F1P         200.000 ppm
F1          20122.55 Hz
F2P         -0.500 ppm
F2          -50.31 Hz
PPMCM       10.02500 ppm/cm
H2CM        1008.64264 Hz/cm

```

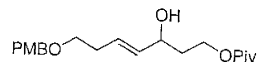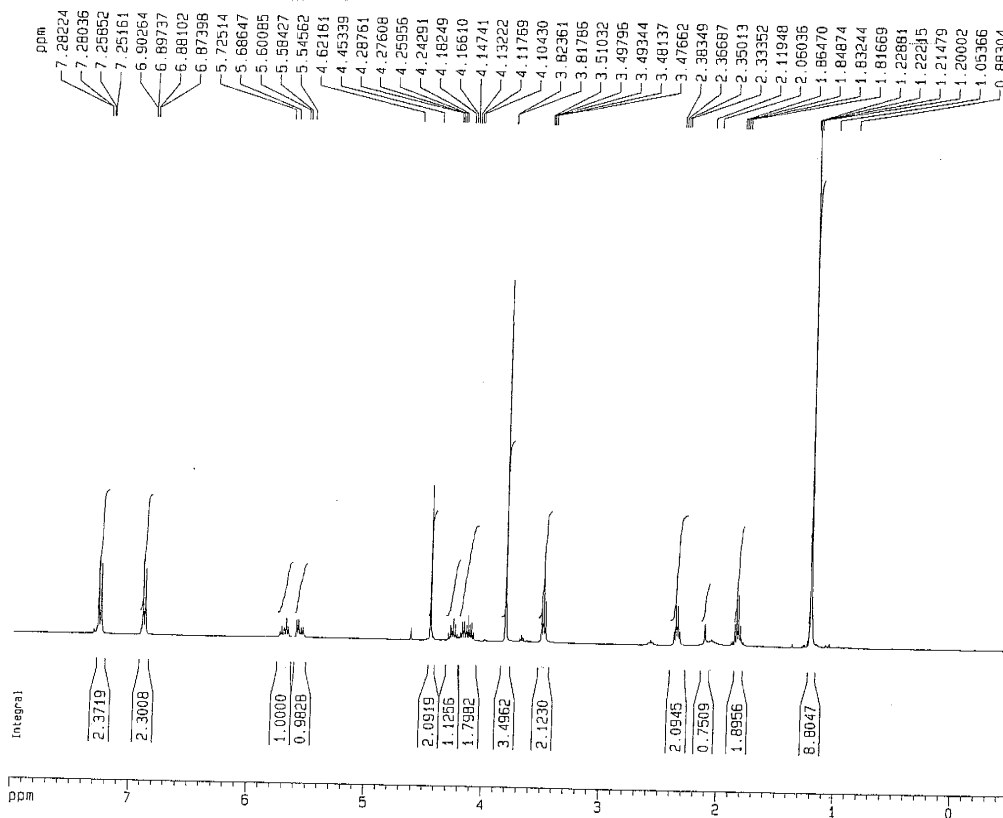

Current Data Parameters  
 NAME wj5-146  
 EXPNO 1  
 PROCNO 1

F2 - Acquisition Parameters  
 Date\_ 20050320  
 Time 15.12  
 INSTRUM spect  
 PROBHD 5 mm QNP 1H/15  
 PULPROG zg30  
 TD 32768  
 SOLVENT CDCl3  
 NS 15  
 DS 2  
 SWH 4789.272 Hz  
 FIDRES 0.146157 Hz  
 AQ 3.4210291 sec  
 RG 114  
 DM 104.400 usec  
 DE 6.00 usec  
 TE 295.6 K  
 O1 1.00000000 sec  
 MCREST 0.00000000 sec  
 MCHRG 0.01500000 sec

===== CHANNEL f1 =====  
 NUC1 1H  
 P1 7.05 usec  
 PL1 -3.00 dB  
 SF01 400.1320007 MHz

F2 - Processing parameters  
 SI 32768  
 SF 400.1300000 MHz  
 MDW EM  
 SSB 0  
 LB 0.30 Hz  
 GB 0  
 PC 1.00

1D NMR plot parameters  
 CX 20.00 cm  
 CY 0.00 cm  
 F1P 8.000 ppm  
 F1 3201.04 Hz  
 F2P -0.500 ppm  
 F2 -200.07 Hz  
 PRMCM 0.42500 ppm/cm  
 HZCM 170.05525 Hz/cm

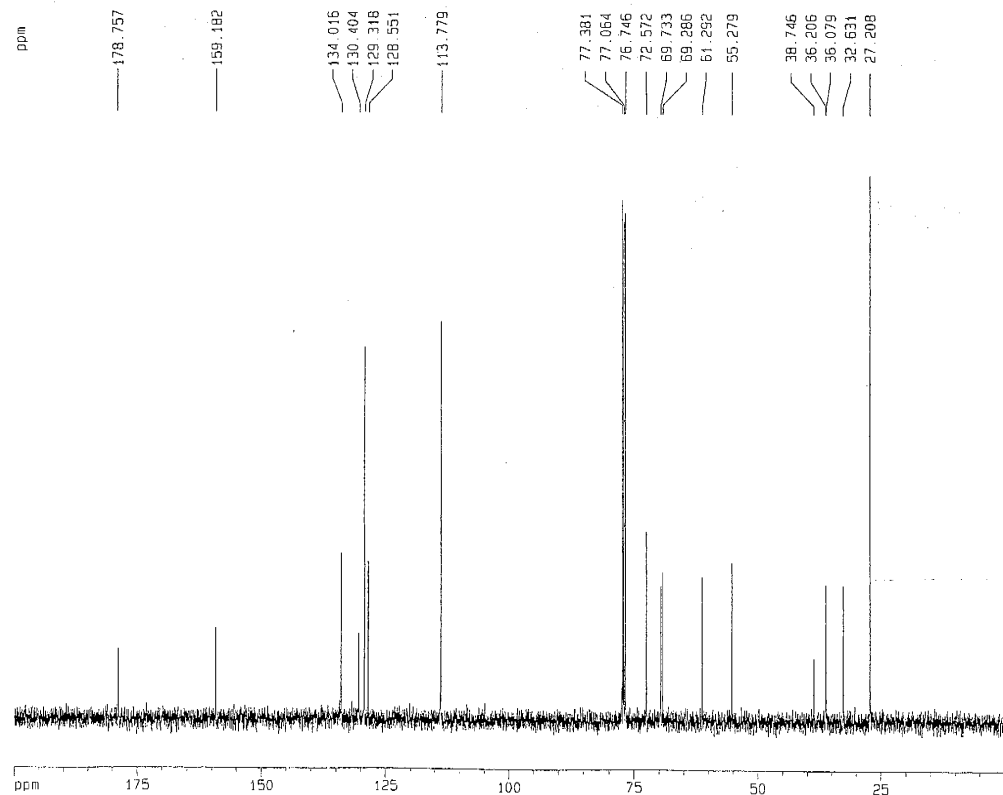

Current Data Parameters  
 NAME wj5-166  
 EXPNO 2  
 PROCNO 1

F2 - Acquisition Parameters  
 Date\_ 20050421  
 Time 21.03  
 INSTRUM spect  
 PROBHD 5 mm QNP 1H/15  
 PULPROG zgpg30  
 TD 65536  
 SOLVENT CDCl3  
 NS 108  
 DS 4  
 SWH 23880.814 Hz  
 FIDRES 0.385919 Hz  
 AQ 1.3884736 sec  
 RG 2048  
 DM 20.850 usec  
 DE 6.00 usec  
 TE 295.6 K  
 O1 0.15000001 sec  
 d11 0.03000000 sec  
 DELTA 0.05000000 sec  
 MCREST 0.00000000 sec  
 MCHRG 0.01500000 sec

===== CHANNEL f1 =====  
 NUC1 13C  
 P1 7.20 usec  
 PL1 -2.00 dB  
 SF01 100.628268 MHz

===== CHANNEL f2 =====  
 CPDPRG2 waltz16  
 NUC2 1H  
 PCPD2 98.40 usec  
 PL2 -3.00 dB  
 PL12 19.95 dB  
 PL13 120.00 dB  
 SF02 400.1316005 MHz

F2 - Processing parameters  
 SI 32768  
 SF 100.6127680 MHz  
 MDW EM  
 SSB 0  
 LB 1.00 Hz  
 GB 0  
 PC 1.40

1D NMR plot parameters  
 CX 20.00 cm  
 CY 0.00 cm  
 F1P 200.000 ppm  
 F1 20122.55 Hz  
 F2P -50.31 Hz  
 F2 10.02500 ppm/cm  
 PRMCM 1008.64307 Hz/cm

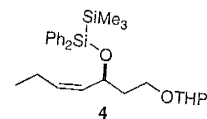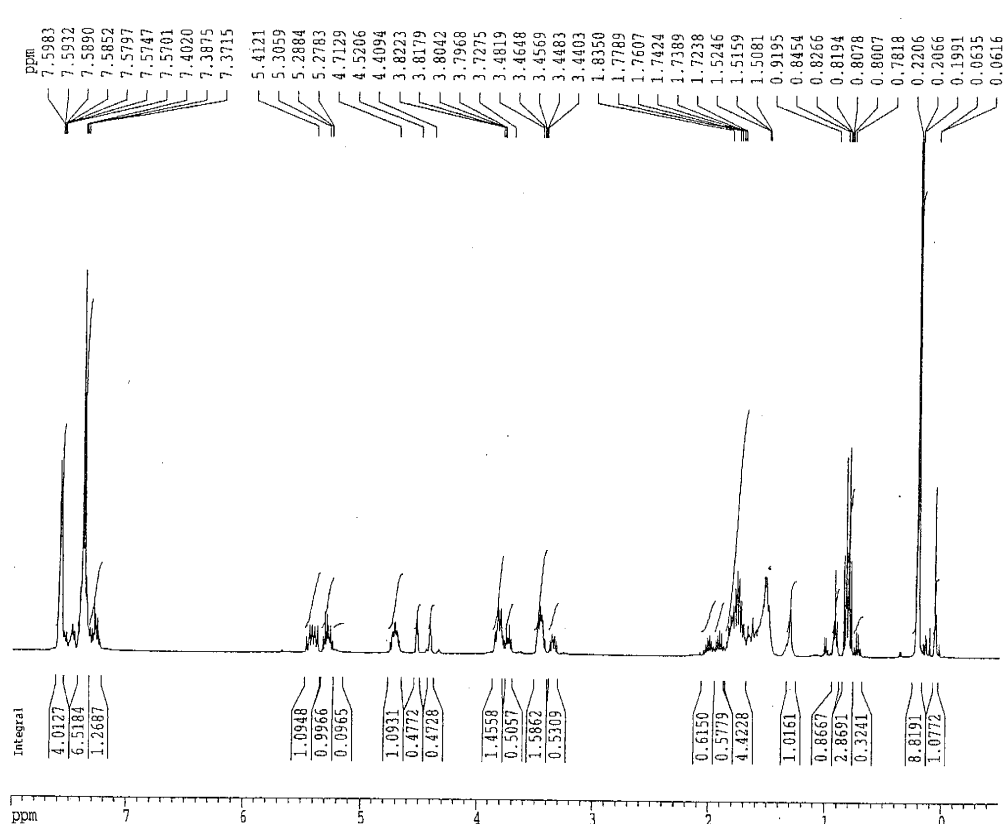

Current Data Parameters  
NAME wj2-220  
EXPRO 1  
PROCNO 1

F2 - Acquisition Parameters  
Date\_ 20020113  
Time 14.28  
INSTRUM drx400  
PROBHD 5 mm Multinu  
PULPROG zg30  
TD 32768  
SOLVENT CDCl3  
NS 16  
DS 2  
SWH 4789.272 Hz  
FIDRES 0.146157 Hz  
AQ 3.4210291 sec  
RG 64  
DW 104.400 usec  
DE 4.50 usec  
TE 300.0 K  
D1 1.00000000 sec

===== CHANNEL f1 =====  
NUC1 1H  
P1 7.70 usec  
PL1 -6.00 dB  
SFO1 400.1320007 MHz

F2 - Processing parameters  
SI 16384  
SF 400.1300000 MHz  
WDW EM  
SSB 0  
LB 0.30 Hz  
GB 0  
PC 1.00

1D NMR plot parameters  
CX 20.00 cm  
F1P 8.000 ppm  
F1 3201.04 Hz  
F2P -0.500 ppm  
F2 -200.07 Hz  
PPMCM 0.42500 ppm/cm  
HZCM 170.05525 Hz/cm

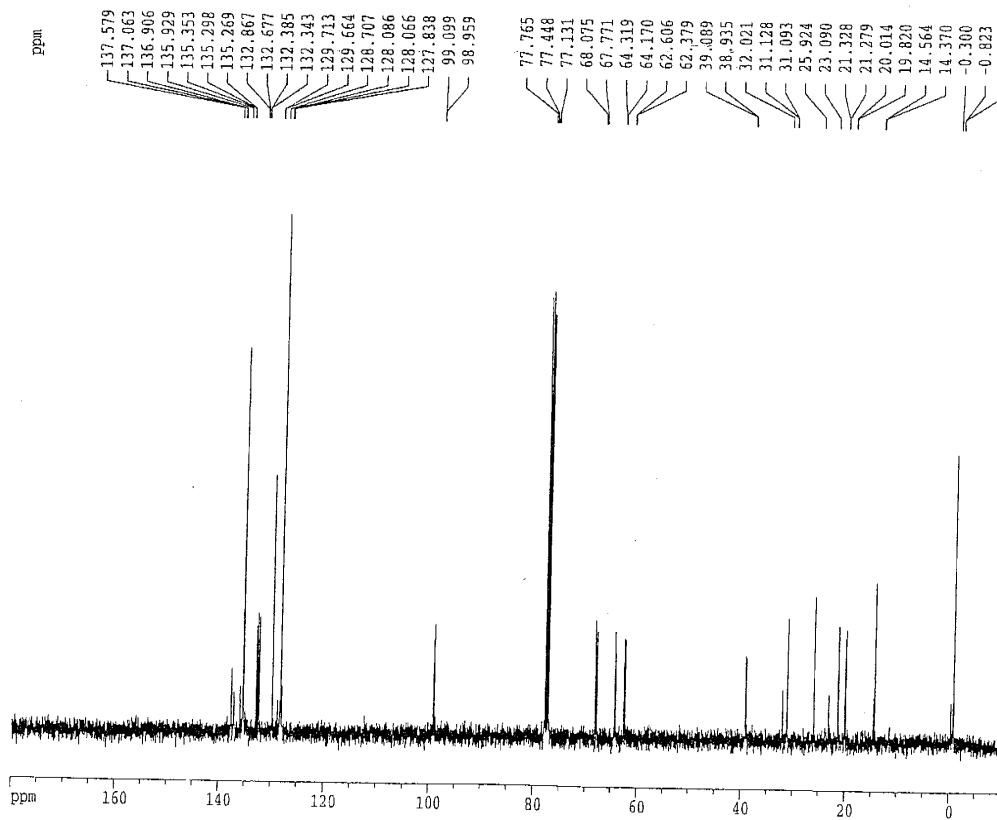

Current Data Parameters  
NAME wj2-220  
EXPRO 2  
PROCNO 1

F2 - Acquisition Parameters  
Date\_ 20020113  
Time 14.32  
INSTRUM drx400  
PROBHD 5 mm Multinu  
PULPROG zgpg30  
TD 65536  
SOLVENT CDCl3  
NS 180  
DS 2  
SWH 23148.148 Hz  
FIDRES 0.353213 Hz  
AQ 1.4156276 sec  
RG 8192  
DW 21.600 usec  
DE 4.50 usec  
TE 300.0 K  
D1 0.05000000 sec  
d11 0.03000000 sec  
d12 0.00002000 sec

===== CHANNEL f1 =====  
NUC1 13C  
P1 12.10 usec  
PL1 2.00 dB  
SFO1 100.6232933 MHz

===== CHANNEL f2 =====  
CPDPRG2 waltz16  
NUC2 1H  
PCPD2 100.00 usec  
PL2 0.00 dB  
PL12 18.00 dB  
PL13 18.00 dB  
SFO2 400.1316005 MHz

F2 - Processing parameters  
SI 32768  
SF 100.6127290 MHz  
WDW EM  
SSB 0  
LB 1.00 Hz  
GB 0  
PC 1.40

1D NMR plot parameters  
CX 20.00 cm  
F1P 180.000 ppm  
F1 18110.29 Hz  
F2P -10.036 ppm  
F2 -1009.74 Hz  
PPMCM 9.50179 ppm/cm  
HZCM 956.00140 Hz/cm

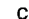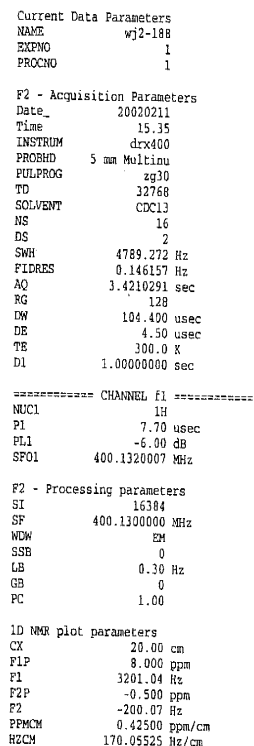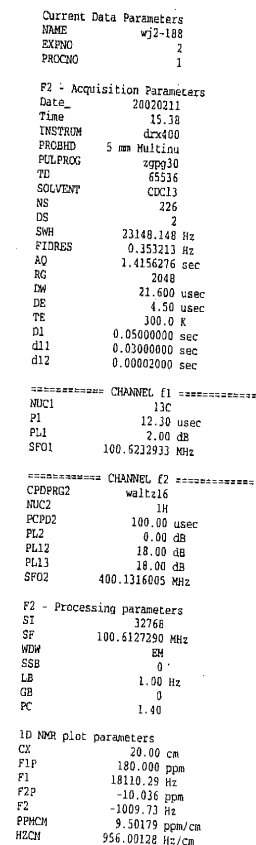

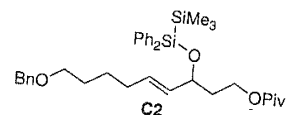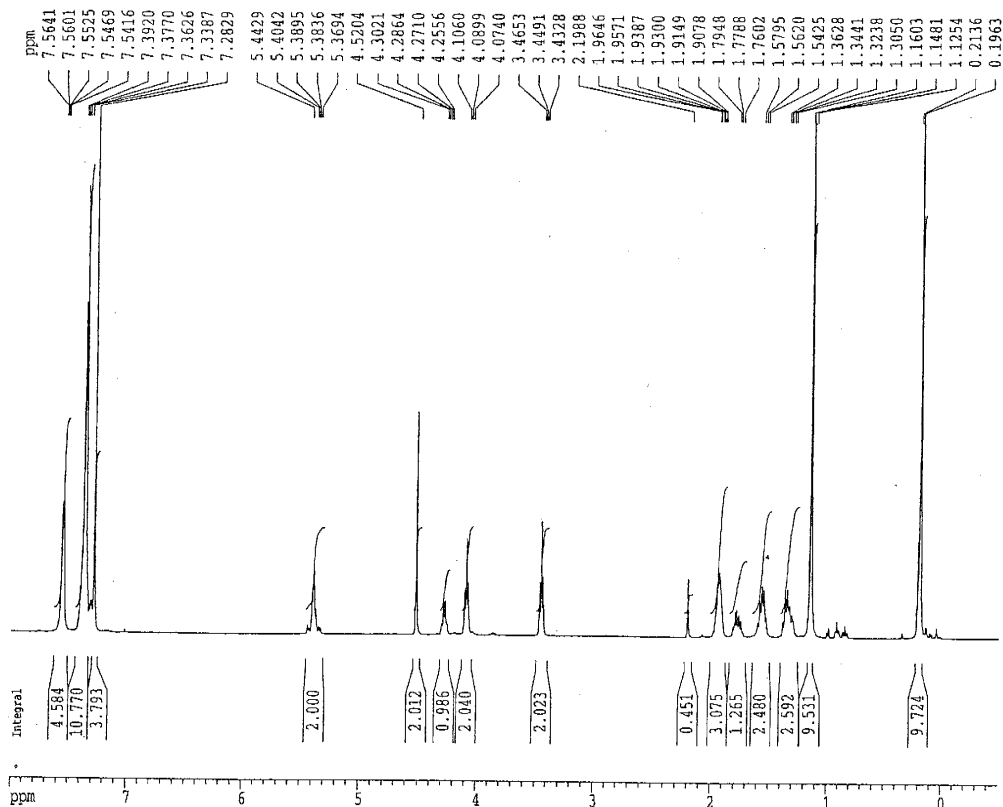

Current Data Parameters  
 NAME wj3-266  
 EXPNO 1  
 PROCNO 1

F2 - Acquisition Parameters  
 Date\_ 20030416  
 Time 11.29  
 INSTRUM drx400  
 PROBRD 5 mm Multinucl  
 PULPROG zg30  
 TD 32768  
 SOLVENT CDCl3  
 NS 16  
 DS 2  
 SWH 4789.272 Hz  
 FIDRES 0.146157 Hz  
 AQ 3.4210291 sec  
 RG 90.5  
 DW 104.400 usec  
 DE 4.50 usec  
 TE 300.0 K  
 D1 1.00000000 sec

===== CHANNEL f1 =====  
 NUC1 1H  
 P1 7.70 usec  
 PL1 -6.00 dB  
 SFO1 400.1320007 MHz

F2 - Processing parameters  
 SI 16384  
 SF 400.1300300 MHz  
 WDW EM  
 SSB 0  
 LB 0.30 Hz  
 GB 0  
 FC 1.00

1D NMR plot parameters  
 CX 20.00 cm  
 CY 0.00 cm  
 F1P 8.000 ppm  
 F1 3201.04 Hz  
 F2P -0.560 ppm  
 F2 -200.07 Hz  
 PPMCM 0.42500 ppm/cm  
 HZCM 170.05525 Hz/cm

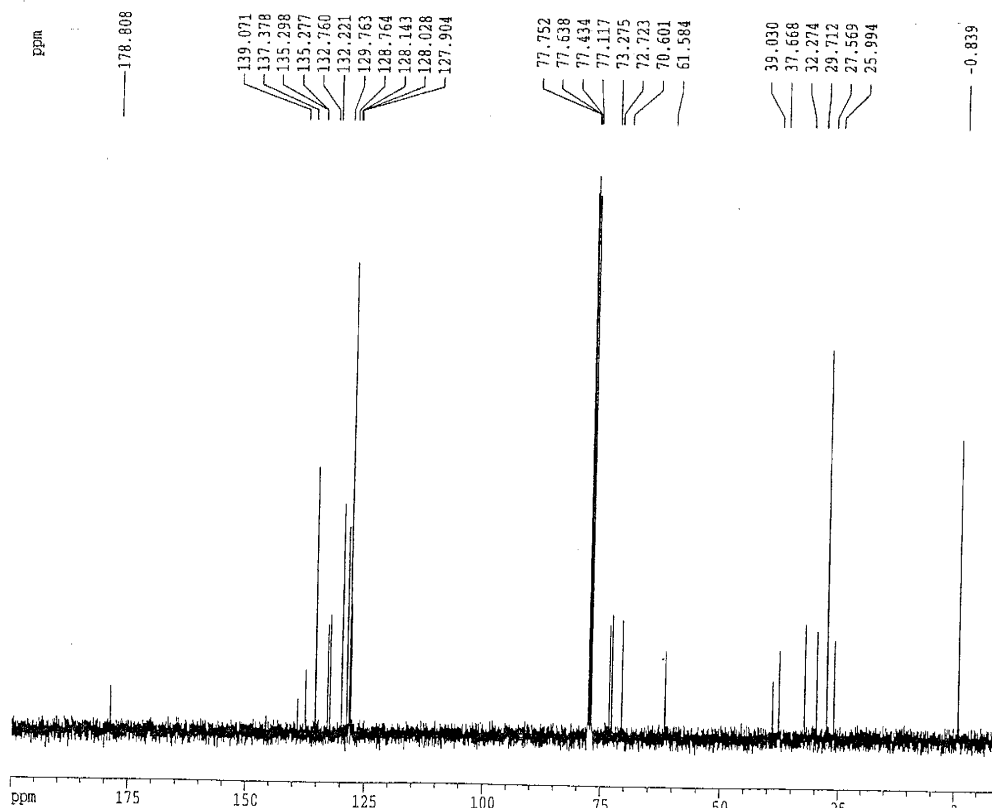

Current Data Parameters  
 NAME wj3-266  
 EXPNO 2  
 PROCNO 1

F2 - Acquisition Parameters  
 Date\_ 20030416  
 Time 11.33  
 INSTRUM drx400  
 PROBRD 5 mm Multinucl  
 PULPROG zgpg30  
 TD 65536  
 SOLVENT CDCl3  
 NS 338  
 DS 2  
 SWH 23148.148 Hz  
 FIDRES 0.353213 Hz  
 AQ 1.4156276 sec  
 RG 12768  
 DW 21.600 usec  
 DE 4.50 usec  
 TE 300.0 K  
 D1 0.05000000 sec  
 d11 0.03000000 sec  
 d12 0.00002000 sec

===== CHANNEL f1 =====  
 NUC1 13C  
 P1 12.30 usec  
 PL1 2.00 dB  
 SFO1 100.6232933 MHz

===== CHANNEL f2 =====  
 CPDPRG2 waltz16  
 NUC2 1H  
 PCPD2 100.00 usec  
 PL2 0.00 dB  
 PL12 18.00 dB  
 PL13 18.00 dB  
 SFO2 400.1316005 MHz

F2 - Processing parameters  
 SI 32768  
 SF 100.6127290 MHz  
 WDW EM  
 SSB 0  
 LB 1.00 Hz  
 GB 0  
 FC 1.40

1D NMR plot parameters  
 CX 20.00 cm  
 CY 0.00 cm  
 F1P 260.000 ppm  
 F1 20122.55 Hz  
 F2P -10.000 ppm  
 F2 -1006.13 Hz  
 PPMCM 10.50000 ppm/cm  
 HZCM 1056.43372 Hz/cm

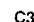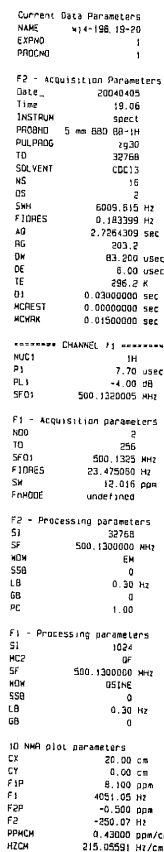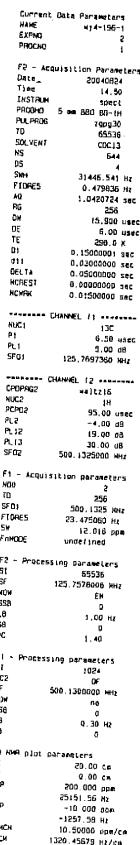

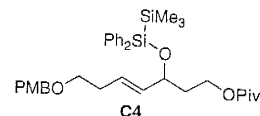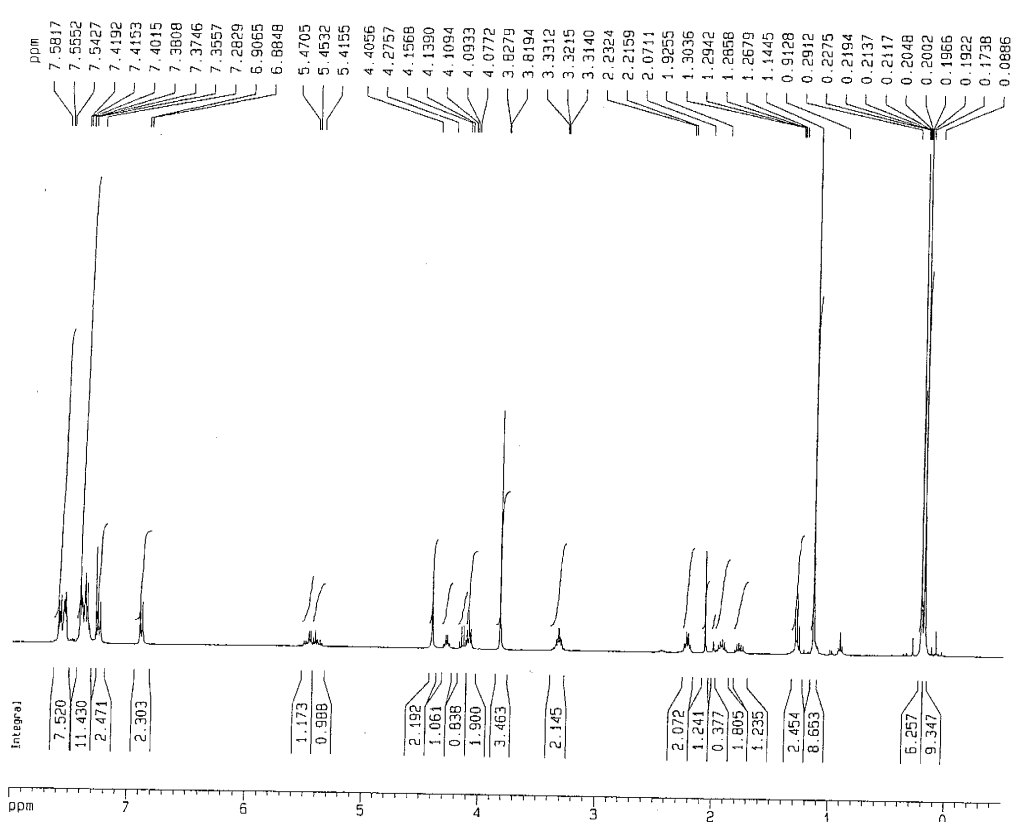

Current Data Parameters  
 NAME wj5-147, 22-37  
 EXPNO 1  
 PROCNO 1

F2 - Acquisition Parameters  
 Date\_ 20050321  
 Time 18.44  
 INSTRUM spect  
 PROBHD 5 mm QNP 1H/15  
 PULPROG zgpg30  
 TD 32768  
 SOLVENT CDCl3  
 NS 16  
 DS 2  
 SWH 4789.272 Hz  
 FIDRES 0.146157 Hz  
 AQ 3.4210291 sec  
 RG 181  
 DW 104.400 usec  
 DE 6.00 usec  
 TE 295.5 K  
 D1 1.00000000 sec  
 MCREST 0.00000000 sec  
 MCWK 0.01500000 sec

\*\*\*\*\* CHANNEL f1 \*\*\*\*\*  
 NUC1 1H  
 P1 7.05 usec  
 PL1 -3.00 dB  
 SFO1 400.1320007 MHz

F2 - Processing parameters  
 SI 32768  
 SF 400.1320000 MHz  
 WDW EM  
 SSB 0  
 LB 0.30 Hz  
 GB 0  
 PC 1.00

1D NMR plot parameters  
 CX 20.00 cm  
 CY 0.00 cm  
 F1P 8.000 ppm  
 F1 3201.04 Hz  
 F2P -0.500 ppm  
 F2 -200.07 Hz  
 PPMCM 0.42500 ppm/cm  
 HZCM 170.05525 Hz/cm

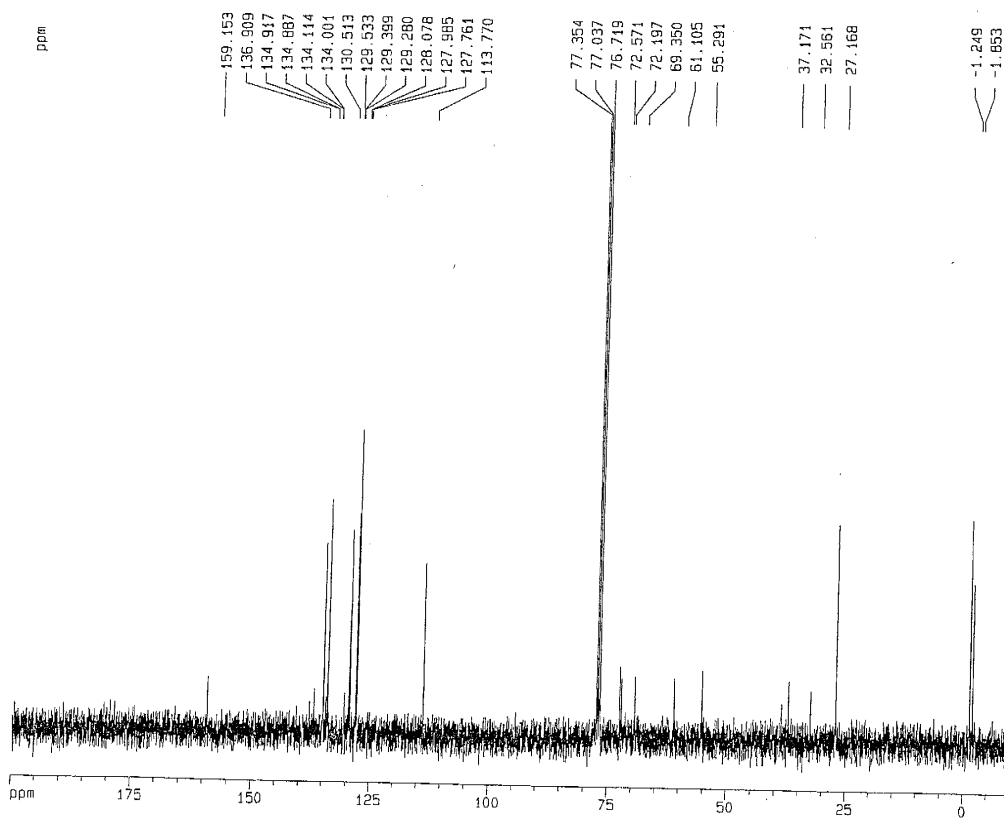

Current Data Parameters  
 NAME wj5-147, 22-37  
 EXPNO 2  
 PROCNO 1

F2 - Acquisition Parameters  
 Date\_ 20050321  
 Time 18.50  
 INSTRUM spect  
 PROBHD 5 mm QNP 1H/15  
 PULPROG zgpg30  
 TD 65536  
 SOLVENT CDCl3  
 NS 496  
 DS 4  
 SWH 23980.814 Hz  
 FIDRES 0.365918 Hz  
 AQ 1.3664756 sec  
 RG 2048  
 DW 20.850 usec  
 DE 6.00 usec  
 TE 295.5 K  
 D1 0.15000000 sec  
 d11 0.03000000 sec  
 DELTA 0.05000000 sec  
 MCREST 0.00000000 sec  
 MCWK 0.01500000 sec

\*\*\*\*\* CHANNEL f1 \*\*\*\*\*  
 NUC1 13C  
 P1 7.20 usec  
 PL1 -2.00 dB  
 SFO1 100.6262298 MHz

\*\*\*\*\* CHANNEL f2 \*\*\*\*\*  
 CPOPRG2 waltz16  
 NUC2 1H  
 PCPD2 98.40 usec  
 PL2 -3.00 dB  
 PL12 15.36 dB  
 PL13 120.00 dB  
 SFO2 400.1316005 MHz

F2 - Processing parameters  
 SI 32768  
 SF 100.6127690 MHz  
 WDW EM  
 SSB 0  
 LB 1.00 Hz  
 GB 0  
 PC 1.40

1D NMR plot parameters  
 CX 20.00 cm  
 CY 0.00 cm  
 F1P 200.000 ppm  
 F1 20120.55 Hz  
 F2P -10.000 ppm  
 F2 -1006.13 Hz  
 PPMCM 10.50000 ppm/cm  
 HZCM 1056.43356 Hz/cm

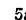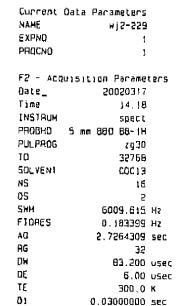

```
***** CHANNEL f1 *****
MUC1          1M
P1             7.70 usec
PL1           -4.00 dB
SF01          500.1320005 MHz
```

```
F1 - Acquisition parameters
ND0      2'
TD      256
SFO1     500.1325 MHz
FIDRES   23.475060 Hz
SW       12.016 ppm
```

```
F2 - Processing parameters
SI              32768
SF              500.1300000 MHz
MDW            EM
SSB             0
LB              0.30 Hz
GB              0
PC              1.00
```

```
F1 - Processing parameters
SI          1024
MC2         OF
SF          500.1300000 MHz
HOW         OSINE
SSB         0
LB          0.30 Hz
GB          0
```

|                        |                 |
|------------------------|-----------------|
| 1D NMR plot parameters |                 |
| CX                     | 20.00 cm        |
| CY                     | 0.00 cm         |
| F1P                    | 8.000 ppm       |
| F1                     | 4001.04 Hz      |
| F2P                    | -0.500 ppm      |
| F2                     | -250.07 Hz      |
| PPMCH                  | 0.42500 ppm/c   |
| HZCH                   | 212.55525 Hz/cm |

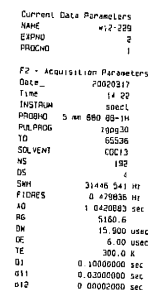

```
***** CHANNEL 31 *****
NUE1          13C
PI            6.50 usec
PL1           5.00 dB
SF01         125.7218473 MHz
```

```
***** CHANNEL 12 *****
CPDRG2          waitz18
MUC2            1M
PCPD2           05 00 usec
PL2             -4 00 dB
PL12            19 00 dB
PL13            30 00 dB
SFQ2            500 125000 HHz
```

```
F1 - Acquisition parameters
NOI          2
TD           256
SF01        500 1325 MHz
FIDRES       23 475060 Hz
SW           12 016 ppm
```

```
F2 - Processing parameters
SI          65536
SF          125 757000 Hz
MOM        EM
SS0         0
LB          1 00 Hz
GB          0
PC          1 40
```

```
F1 - Processing parameters
SI          1024
MC2        0F
SF          500 1300000 MHz
MDM        00
SSB         0
LB          0.20 MHz
GB          0
```

| 1D NMR dipol parameters |                 |
|-------------------------|-----------------|
| CX                      | 20 00 cm        |
| CY                      | 0 00 cm         |
| F1P                     | 180 000 ppm     |
| F1                      | 22636 40 Hz     |
| F2P                     | -12 529 ppm     |
| F2                      | -1578 91 Hz     |
| PPHCH                   | 9 6696 ppm/cm   |
| HZCH                    | 1210 5637 Hz/cm |

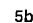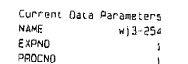

```

F2 - Acquisition Parameters
Date_      20030405
Time       16.59
INSTRUM    spect
PROBHD     5 mm BB-1H
PULPROG    zg30
TD          32768
SOLVENT    CDCl3
NS          16
DS          2
SWH         6009.615 Hz
FIDRES     0.183399 Hz
AQ          2.7264309 sec
RG          512
OW          83.200 usec
DE          6.00 usec
TE          300.0 K
OT          0.0300000 sec

```

```
***** CHANNEL f1 *****
NUC1              1H
P1                 7.70 usec
PL1                -4.00 dB
SF01              500.1320005 MHz
```

```
F2 - Processing parameters
SI          32768
SF          500.1300000 MHz
WDW         EM
SSB         0
LB          0.30 Hz
GB          0
PC          1.00
```

```
F1 - Processing parameters
SI          1024
MC2         QF
SF          500.1300000 MHz
WDW         QSINE
SSB         0
LB          0.30 Hz
GB          0
```

```

1D NMR plot parameters
CX              20.00 cm
CY              0.00 cm
F1P            8.000 ppm
F1             4001.04 Hz
F2P           -0.500 ppm
F2            -250.07 Hz
PPMCM          0.42500 ppm/cm
HZCM           212.55525 Hz/cm

```

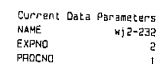

```

F2 - Acquisition Parameters
Date_          20020319
Time           10.23
INSTRUM        spect
PROBHD         5 mm BBO 80-1H
PULPROG        zgpg30
TD             65536
SOLVENT        CDCl3
NS             105
DS             4
SWH            31446.541 Hz
FIDRES         0.479836 Hz
AQ            1.0420883 sec
RG            2500.3
OW            15.900 usec
DE            6.00 usec
TE            300.0 K
D1            0.1000000 sec
d11           0.0300000 sec
d12           0.0002000 sec

```

```
***** CHANNEL 1 *****
NUC1          13C
P1             6.50 usec
PL1            5.00 dB
SF01          125.7719472 MHz
```

```
***** CHANNEL 12 *****
CPDRAG2          wait:16
NUC2              1H
PCPD2            95.00 usec
PL2              -4.00 dB
PL12             19.00 dB
PL13             30.00 dB
SF02            500.1325000 MHz
```

```
F2 - Processing parameters
S1                65536
SF                125.7578008 MHz
WDM              EN
SSB              0
LB               1.00 Hz
GB               0
PC               1.40
```

1D NMR plot parameters

|       |                  |
|-------|------------------|
| CX    | 20.00 cm         |
| CY    | 0.00 cm          |
| F1P   | 180.000 ppm      |
| F1    | 22636.41 Hz      |
| F2P   | -12.539 ppm      |
| F2    | -1576.91 Hz      |
| PPMCH | 9.62696 ppm/cm   |
| HZCH  | 1210.66589 Hz/cm |

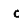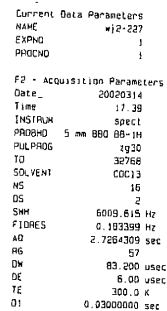

```
***** CHANNEL 1 *****
NUC1          1H
P1             7.70 usec
PL1           -4.00 dB
SFD1          500.1320005 MHz
```

```
F1 - Acquisition parameters
NOO                2
TQ                 256
SFO1              500.1325 MHz
FIDRES            23.475050 Hz
SN                12.016 atom
```

```
F2 - Processing parameters
SI          32768
SF          500.1300000 MHz
WDW         EM
SSB         0
LA          0.30 Hz
GB          0
PC          1.00
```

```
F1 - Processing parameters
SI          1024
MC2         OF
SF          500.1300000 MHz
WDW         GSINE
SSB         0
LB          0.30 Hz
GB          0
```

```

1D NMR plot parameters
CX          20.00 cm
CY          0.00 cm
F1P         8.000 ppm
F1          4001.04 Hz
F2P        -0.500 ppm
F2         -250.07 Hz
PPMCH       0.42500 ppm/cm
HZCH       212.55525 Hz/cm

```

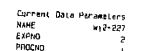

```

F2 - Acquisition Parameters
Date_      20020314
Time       17.43
INSTRUM    SGE01
PROBHD     5 mm QNP 800 MHz
PULPROG    zgpg30
TD          65536
SOLVENT    CDCl3
NS          232
DS          4
SWH         31446.541 Hz
FIDRES     0.479936 Hz
AQ          1.0470883 sec
RG          2048
BW          15.900 usec
QE          6.00 usec
TE          300.0 K
D1          0.10000000 sec
d11         0.03000000 sec
d12         0.00002000 sec

```

```

***** CHANNEL f1 *****
MUC1          13C
P1             5.30 uscc
PL1            5.00 dB
SF01          125.7719472 MHz

```

```
***** CHANNEL 12 *****
CPDPRG2          wait:16
MIC2              IN
PCPD2            95.00 usec
PL2              +4.00 dB
PL12             19.00 dB
PL13             30.00 dB
SF02             500 1325000 Hz
```

```

F1 - ACQUISITION PARAMETERS
MOD          2
TO           256
SFB1        500 1325 MHZ
FIDRES      23 475060 Hz
SM          12 016 ppm

```

| Processing parameters |                |
|-----------------------|----------------|
| 1                     | 85536          |
| 2                     | 125.7578008 Hz |
| 3                     | EN             |
| 4                     | 0              |
| 5                     | 1.00 Hz        |
| 6                     | 0              |
| 7                     | 1.40           |

```

- Processing parameters
      1024
      OF
      500.1300000 MHz
      no
      0
      0.30 Hz
      0

```

```

NMR plot parameters
      0.00 cm
      0.00 cm
P      180.000 dm
      22636.40 Hz
      -12.939 ppm
      -1576.91 Hz
      9.82696 ppm/cm
      1210.66572 MHz

```

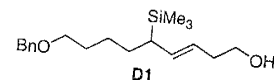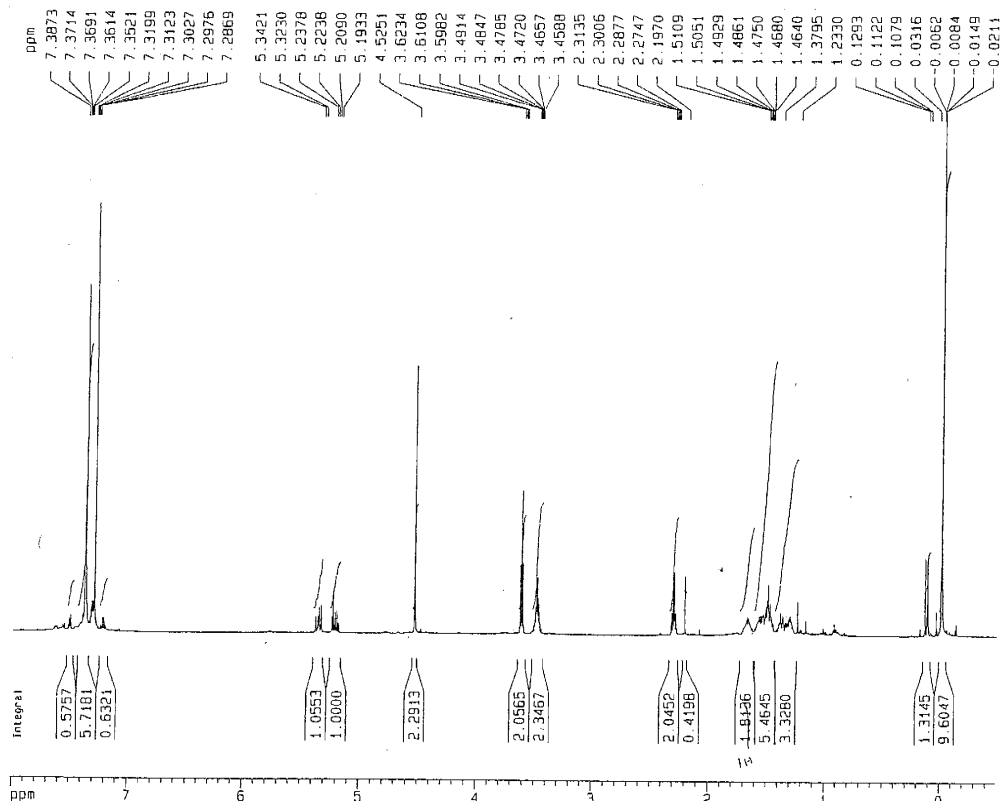

Current Data Parameters  
 NAME w13-268  
 EXPNO 1  
 PROCNO 1  
 F2 - Acquisition Parameters  
 Date\_ 20030418  
 Time 19.06  
 INSTRUM spect  
 PROBHD 5 mm BBO BB-1H  
 PULPROG zg30  
 TO 32768  
 SOLVENT CDCl<sub>3</sub>  
 NS 16  
 DS 2  
 SWH 6009.615 Hz  
 FIDRES 0.183399 Hz  
 AQ 2.7264308 sec  
 RG 101.6  
 OW 83.200 usec  
 DE 6.00 usec  
 TE 300.0 K  
 D1 0.03000000 sec

\*\*\*\*\* CHANNEL f1 \*\*\*\*\*  
 NUC1 <sup>1</sup>H  
 P1 7.70 usec  
 PL1 -4.00 dB  
 SFO1 500.1320005 MHz

F2 - Processing parameters  
 SI 32768  
 SF 500.1300000 MHz  
 WDN EM  
 SSB 0  
 LB 0.30 Hz  
 GB 0  
 PC 1.00

F1 - Processing parameters  
 SI 1024  
 MC2 OF  
 SF 500.1300000 MHz  
 WDN no  
 SSB 0  
 LB 0.30 Hz  
 GB 0

1D NMR plot parameters  
 CX 20.00 cm  
 CY 0.00 cm  
 F1P 8.000 ppm  
 F1 4001.04 Hz  
 F2P -0.500 ppm  
 F2 -250.07 Hz  
 PPMCH 0.42500 ppm/cm  
 HZCN 212.55525 Hz/cm

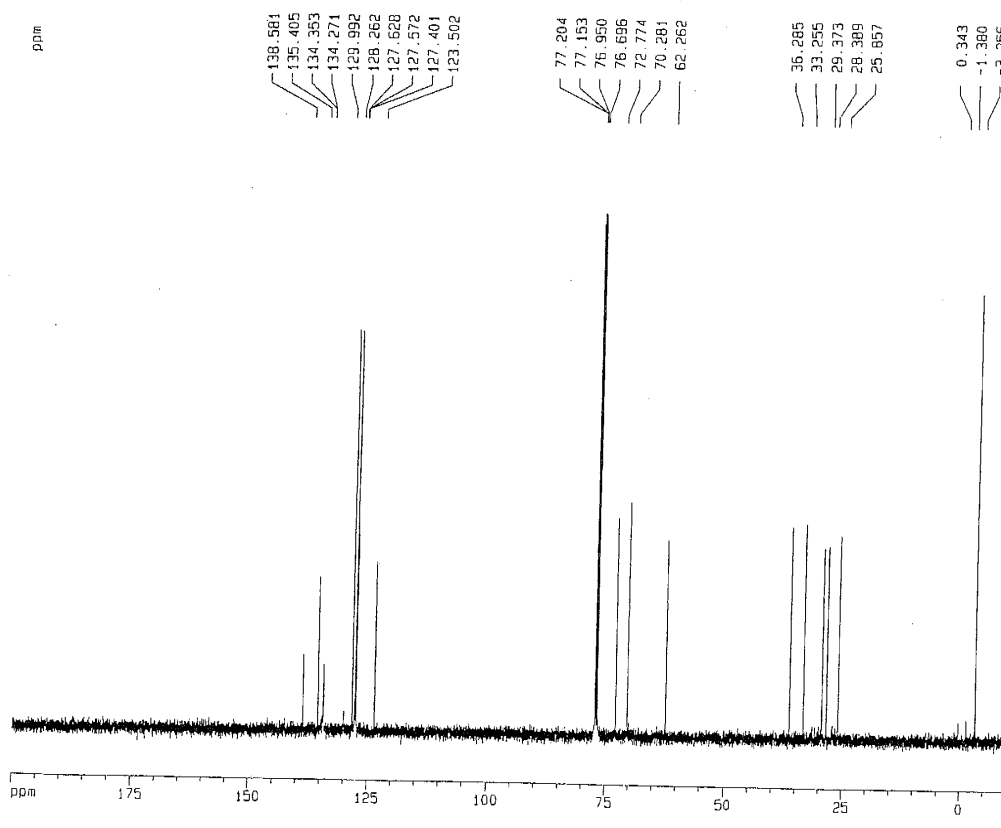

Current Data Parameters  
 NAME w13-269  
 EXPNO 2  
 PROCNO 1  
 F2 - Acquisition Parameters  
 Date\_ 20030418  
 Time 19.11  
 INSTRUM spect  
 PROBHD 5 mm BBO BB-1H  
 PULPROG zgpg30  
 TO 65536  
 SOLVENT CDCl<sub>3</sub>  
 NS 320  
 DS 4  
 SWH 31446.541 Hz  
 FIDRES 0.479886 Hz  
 AQ 1.0420883 sec  
 RG 2048  
 OW 15.900 usec  
 DE 6.00 usec  
 TE 300.0 K  
 D1 0.10000000 sec  
 d11 0.03000000 sec  
 d12 0.00002000 sec

\*\*\*\*\* CHANNEL f1 \*\*\*\*\*  
 NUC1 <sup>13</sup>C  
 P1 8.50 usec  
 PL1 3.00 dB  
 SFO1 125.7718472 MHz

\*\*\*\*\* CHANNEL f2 \*\*\*\*\*  
 CPROG2 waltz16  
 NUC2 <sup>1</sup>H  
 PCPR2 95.00 usec  
 PL2 -4.00 dB  
 PL12 15.00 dB  
 PL13 30.00 dB  
 SFO2 500.1325000 MHz

F2 - Processing parameters  
 SI 65536  
 SF 125.7578005 MHz  
 WDN EM  
 SSB 0  
 LB 1.00 Hz  
 GB 0  
 PC 1.40

F1 - Processing parameters  
 SI 1024  
 MC2 OF  
 SF 500.1300000 MHz  
 WDN no  
 SSB 0  
 LB 0.30 Hz  
 GB 0

1D NMR plot parameters  
 CX 20.00 cm  
 CY 0.00 cm  
 F1P 200.000 ppm  
 F1 25151.56 Hz  
 F2P -10.000 ppm  
 F2 -1257.58 Hz  
 PPMCH 10.50000 ppm/cm  
 HZCN 1320.45931 Hz/cm



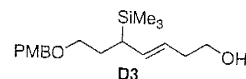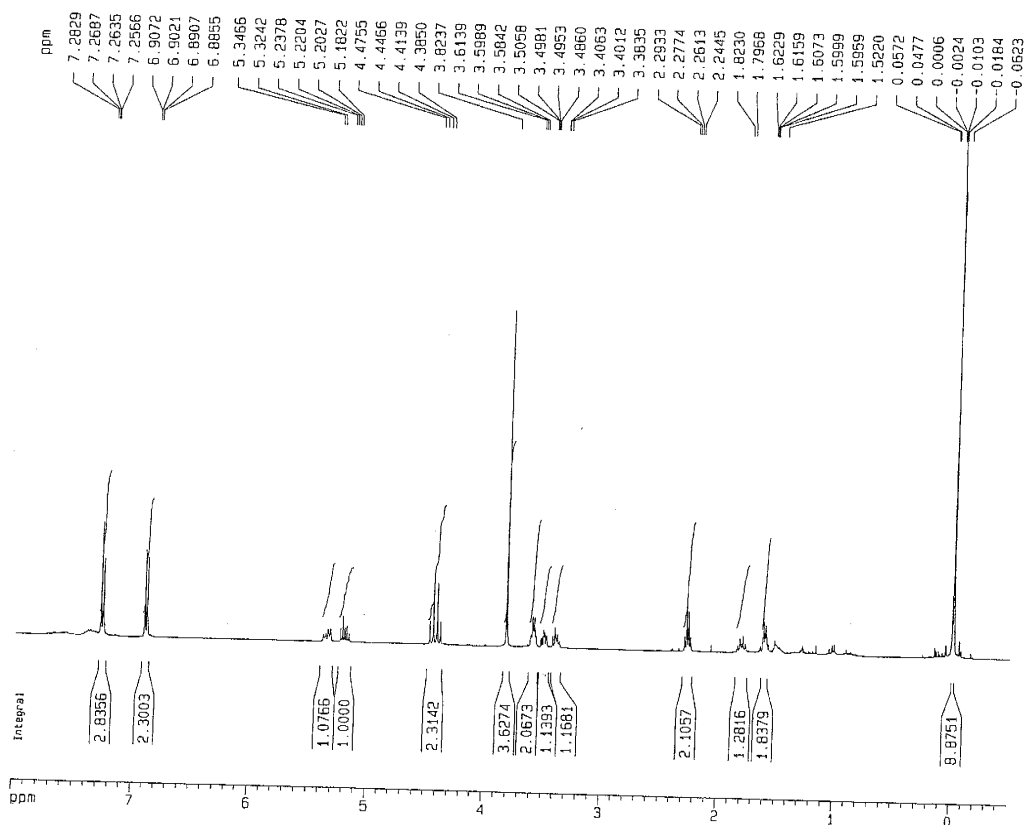

Current Data Parameters  
 NAME wj5-148  
 EXPNO 1  
 PROCNO 1  
 F2 - Acquisition Parameters  
 Date\_ 20050322  
 Time 18.30  
 INSTRUM spect  
 PROBHD 5 mm QNP 1H/15  
 PULPROG zg30  
 TD 32768  
 SOLVENT CDCl3  
 NS 16  
 DS 2  
 SWH 4789.272 Hz  
 FIDRES 0.146157 Hz  
 AQ 3.4210291 sec  
 RG 161.3  
 DW 104.400 usec  
 DE 6.00 usec  
 TE 295.1 K  
 D1 1.00000000 sec  
 MCREST 0.00000000 sec  
 MCWRR 0.01500000 sec

\*\*\*\*\* CHANNEL f1 \*\*\*\*\*  
 NUC1 1H  
 P1 7.05 usec  
 PL1 -3.00 dB  
 SFO1 400.1320007 MHz

F2 - Processing parameters  
 SI 32768  
 SF 400.1300000 MHz  
 WDW EM  
 SSB 0  
 LB 0.30 Hz  
 GB 0  
 PC 1.00

1D NMR plot parameters  
 CX 20.00 cm  
 CY 0.00 cm  
 F1P 8.000 ppm  
 F2P 3201.04 Hz  
 F2 -200.07 Hz  
 PPMCH 0.42500 ppm/cm  
 HZCM 170.05525 Hz/cm

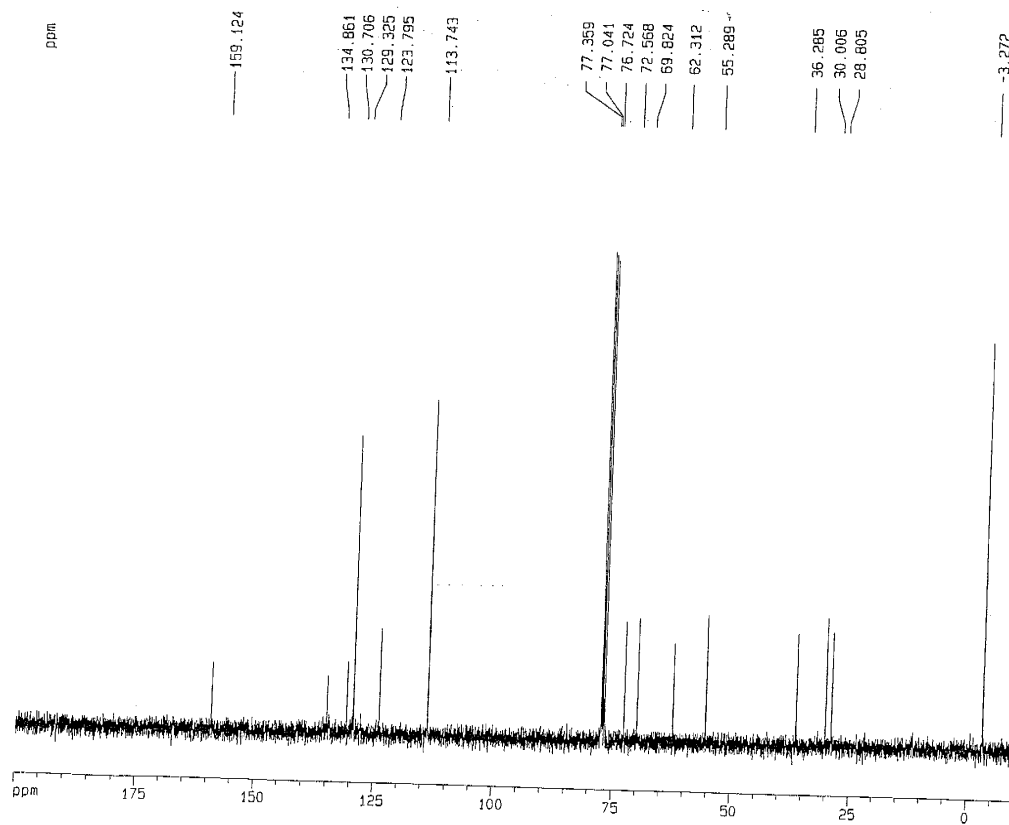

Current Data Parameters  
 NAME wj5-148  
 EXPNO 2  
 PROCNO 1

F2 - Acquisition Parameters  
 Date\_ 20050322  
 Time 18.34  
 INSTRUM spect  
 PROBHD 5 mm QNP 1H/15  
 PULPROG zgpg30  
 TD 65536  
 SOLVENT CDCl3  
 NS 263  
 DS 4  
 SWH 23980.814 Hz  
 FIDRES 0.365818 Hz  
 AQ 1.3564756 sec  
 RG 2048  
 DW 20.050 usec  
 DE 6.02 usec  
 TE 296.2 K  
 D1 0.15000001 sec  
 D11 0.03000000 sec  
 DELTA 0.05000000 sec  
 MCREST 0.00000000 sec  
 MCWRR 0.01500000 sec

\*\*\*\*\* CHANNEL f1 \*\*\*\*\*  
 NUC1 13C  
 P1 7.20 usec  
 PL1 -2.00 dB  
 SFO1 100.62826298 MHz

\*\*\*\*\* CHANNEL f2 \*\*\*\*\*  
 CHOPRG2 waltz16  
 NUC2 1H  
 PCPD2 98.40 usec  
 PL2 -3.00 dB  
 PL12 19.96 dB  
 PL13 120.00 dB  
 SFO2 400.1316005 MHz

F2 - Processing parameters  
 SI 32768  
 SF 100.6127690 MHz  
 WDW EM  
 SSB 0  
 LB 1.00 Hz  
 GB 0  
 PC 1.40

1D NMR plot parameters  
 CX 20.00 cm  
 CY 0.00 cm  
 F1P 200.000 ppm  
 F2P 20122.55 Hz  
 F2 -10.000 ppm  
 PPMCH 10.50000 ppm/cm  
 HZCM 1036.43408 Hz/cm

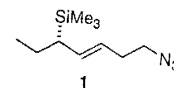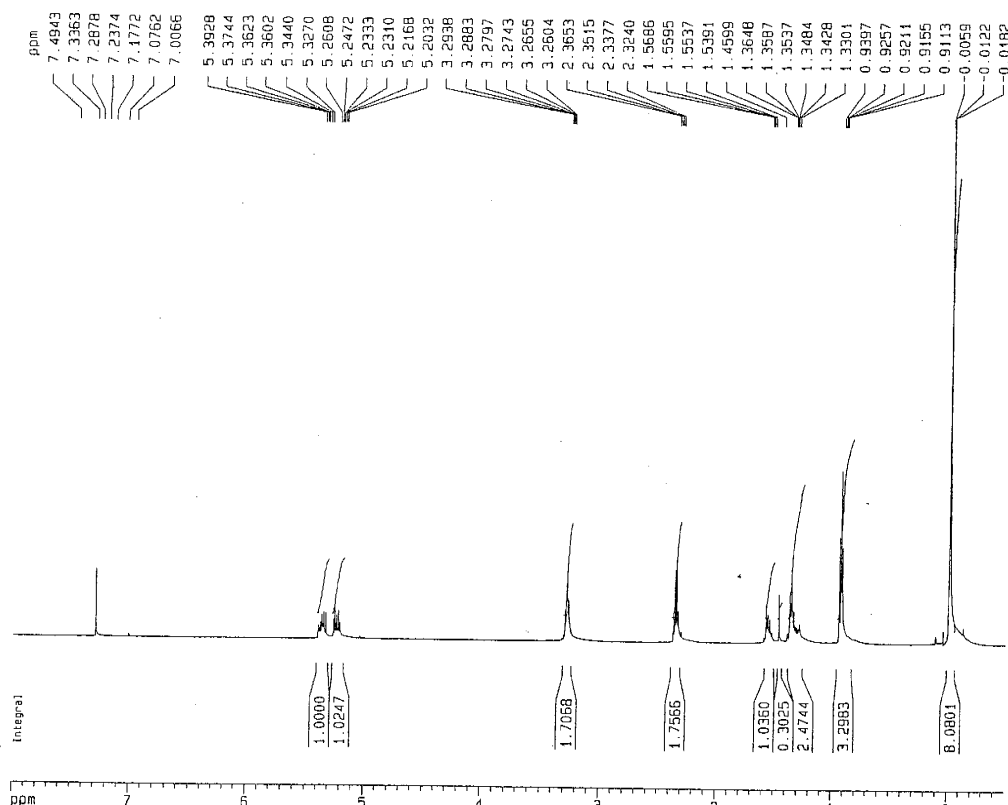

Current Data Parameters  
 NAME wj3-193  
 EXPNO 1  
 PROCNO 1  
 F2 - Acquisition Parameters  
 Date\_ 20011213  
 Time 16.44  
 INSTRUM spect  
 PROBHD 5 mm Txi 1H-13  
 PULPROG zg30  
 TD 32768  
 SOLVENT CDCl3  
 NS 2  
 DS 2  
 SWH 6009.615 Hz  
 FIDRES 0.181398 Hz  
 AQ 2.7264309 sec  
 RG 203.2  
 DW 83.200 usec  
 DE 6.00 usec  
 TE 300.0 K  
 D1 0.03000000 sec

\*\*\*\*\* CHANNEL f1 \*\*\*\*\*  
 NUC1 1H  
 P1 7.70 usec  
 PL1 -4.00 dB  
 SFO1 500.1320005 MHz

F1 - Acquisition Parameters  
 NUC2 13C  
 TD 256  
 SFO1 500.1325 MHz  
 FIDRES 23.475060 Hz  
 SW 12.015 ppm

F2 - Processing parameters  
 SI 32768  
 SF 500.1300000 MHz  
 WDW EM  
 SSB 0  
 LB 0.30 Hz  
 GB 0  
 PC 1.00

F1 - Processing parameters  
 SI 1024  
 NUC2 13C  
 SF 500.1300000 MHz  
 WDW OSINE  
 SSB 0  
 LB 0.30 Hz  
 GB 0

1D NMR plot parameters  
 CX 20.00 cm  
 CY 0.00 cm  
 FIP 8.500 ppm  
 F1 4001.04 Hz  
 F2 -250.07 Hz  
 F2 0.42500 ppm/cm  
 FPCMC 212.5525 Hz/cm  
 HZCM

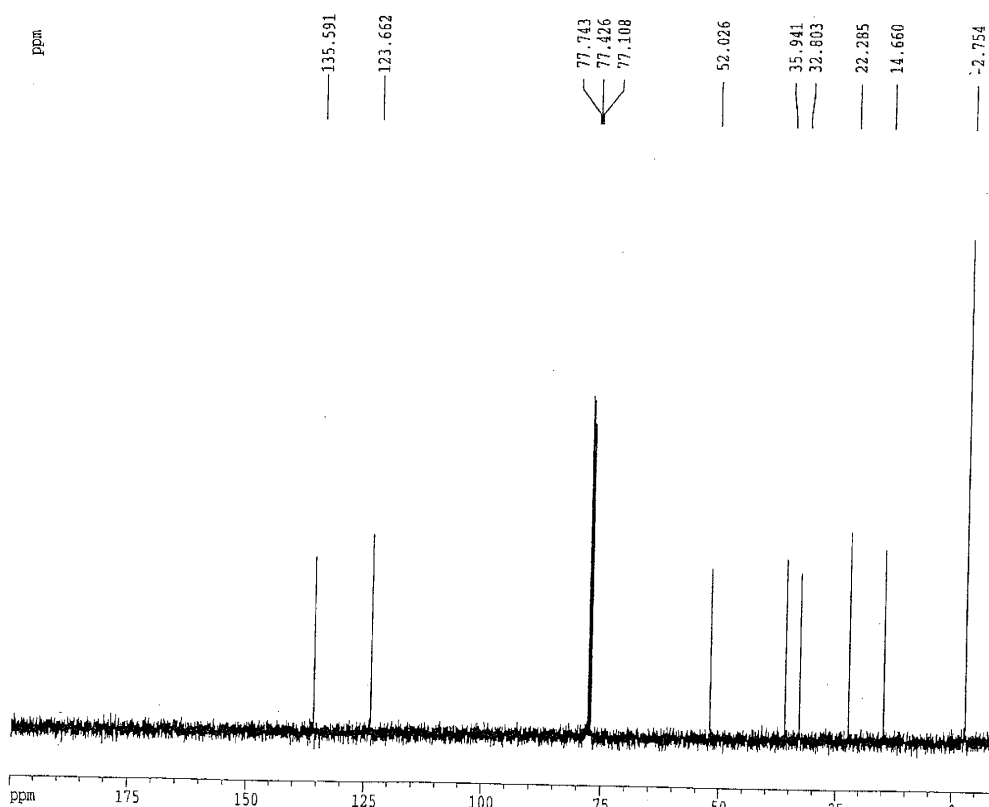

Current Data Parameters  
 NAME wj3-24.c  
 EXPNO 2  
 PROCNO 1

F2 - Acquisition Parameters  
 Date\_ 20030506  
 Time 15.08  
 INSTRUM spect  
 PROBHD 5 mm Multinuc1  
 PULPROG zgpg30  
 TD 65536  
 SOLVENT CDCl3  
 NS 120  
 DS 2  
 SWH 23149.148 Hz  
 FIDRES 0.351213 Hz  
 AQ 1.4156276 sec  
 RG 32768  
 DW 21.600 usec  
 DE 4.50 usec  
 TE 300.0 K  
 D1 0.05000000 sec  
 d11 0.03000000 sec  
 d12 0.0002000 sec

\*\*\*\*\* CHANNEL f1 \*\*\*\*\*  
 NUC1 13C  
 P1 12.30 usec  
 PL1 2.00 dB  
 SFO1 100.6232933 MHz

\*\*\*\*\* CHANNEL f2 \*\*\*\*\*  
 CPDPRG2 waltz16  
 NUC2 1H  
 PCPD2 100.00 usec  
 PL2 0.00 dB  
 PL12 18.00 dB  
 PL13 18.00 dB  
 SFO2 400.1316005 MHz

F2 - Processing parameters  
 SI 32768  
 SF 100.6127290 MHz  
 WDW EM  
 SSB 0  
 LB 1.00 Hz  
 GB 0  
 PC 1.40

1D NMR plot parameters  
 CX 20.00 cm  
 CY 0.00 cm  
 FIP 200.000 ppm  
 F1 20122.55 Hz  
 F2 -10.000 ppm  
 F2 -1006.13 Hz  
 FPCMC 10.50000 ppm/cm  
 HZCM 1056.43372 Hz/cm

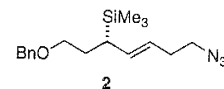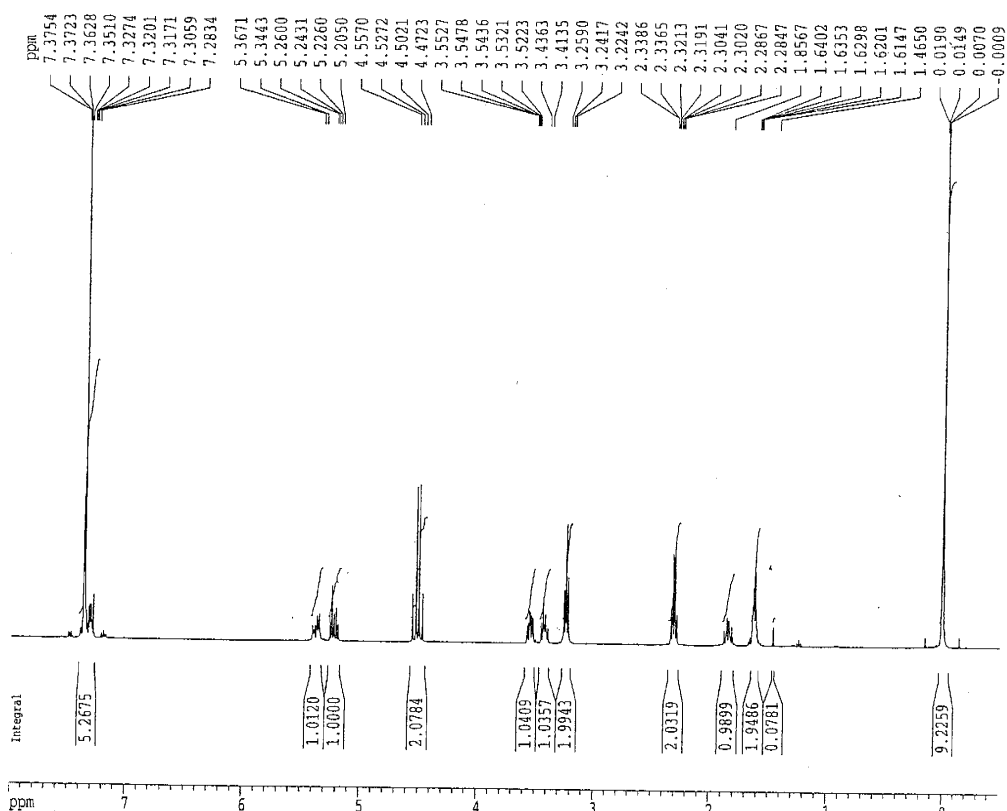

Current Data Parameters  
 NAME wj2-200  
 EXPNO 1  
 PROCNO 1

F2 - Acquisition Parameters  
 Date 20020218  
 Time 11.08  
 INSTRUM drx400  
 PROBD 5 mm Multinu  
 PULPROG zgpg30  
 TD 32768  
 SOLVENT CDCl3  
 NS 16  
 DS 2  
 SWH 4789.272 Hz  
 FIDRES 0.146157 Hz  
 AQ 3.4210291 sec  
 RG 64  
 DW 104.400 usec  
 DE 4.50 usec  
 TE 300.0 K  
 DI 1.00000000 sec

CHANNEL f1  
 NUC1 1H  
 P1 7.70 usec  
 PL1 -6.00 dB  
 SFO1 400.1320007 MHz

F2 - Processing parameters  
 SI 16384  
 SF 400.1300000 MHz  
 WDW EM  
 SSB 0  
 LB 0.30 Hz  
 GB 0  
 PC 1.00

1D NMR plot parameters  
 CX 20.00 cm  
 FLP 8.000 ppm  
 F1 3201.04 Hz  
 F2P -0.500 ppm  
 F2 -200.07 Hz  
 PPMCM 0.42500 ppm/cm  
 HZCM 170.05525 Hz/cm

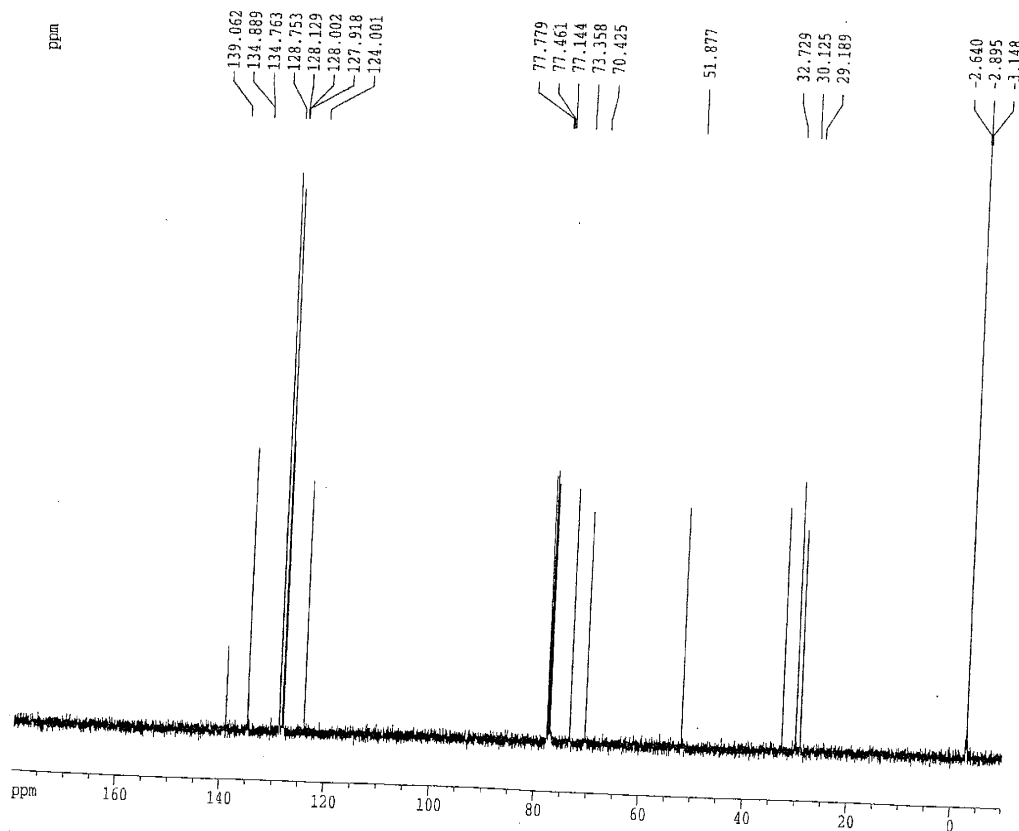

Current Data Parameters  
 NAME wj2-200  
 EXPNO 2  
 PROCNO 1

F2 - Acquisition Parameters  
 Date 20020218  
 Time 11.12  
 INSTRUM drx400  
 PROBD 5 mm Multinu  
 PULPROG zgpg30  
 TD 65536  
 SOLVENT CDCl3  
 NS 155  
 DS 2  
 SWH 23148.148 Hz  
 FIDRES 0.351213 Hz  
 AQ 1.4156276 sec  
 RG 1024  
 DW 21.600 usec  
 DE 4.50 usec  
 TE 300.0 K  
 DI 0.05000000 sec  
 d11 0.03000000 sec  
 d12 0.00002000 sec

CHANNEL f1  
 NUC1 13C  
 P1 12.30 usec  
 PL1 2.00 dB  
 SFO1 100.6232913 MHz

CHANNEL f2  
 CPDPRG2 waltz16  
 NUC2 1H  
 PCPD2 100.00 usec  
 PL2 0.00 dB  
 PL12 18.00 dB  
 PL13 18.00 dB  
 SFO2 400.1316005 MHz

F2 - Processing parameters  
 SI 32768  
 SF 100.6127290 MHz  
 WDW EM  
 SSB 0  
 LB 1.00 Hz  
 GB 0  
 PC 1.40

1D NMR plot parameters  
 CX 20.00 cm  
 FLP 180.000 ppm  
 F1 18110.29 Hz  
 F2P -10.036 ppm  
 F2 -1005.73 Hz  
 PPMCM 9.50179 ppm/cm  
 HZCM 956.00128 Hz/cm



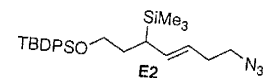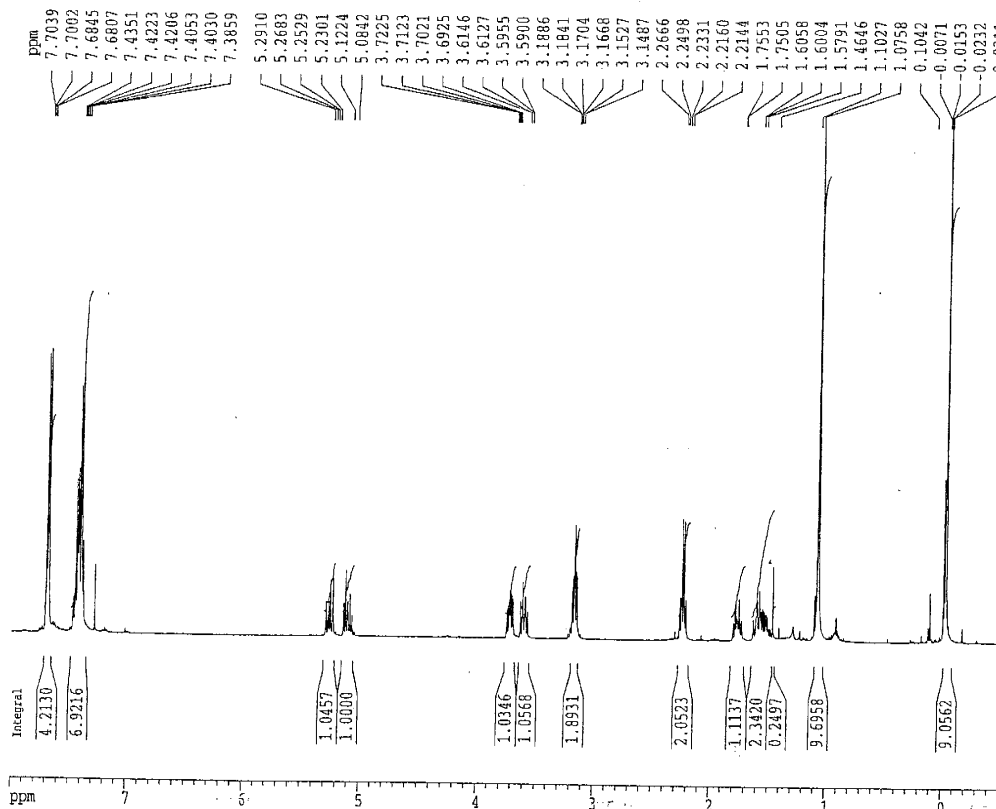

Current Data Parameters  
 NAME wj4-202  
 EXPNO 1  
 PROCNO 1

F2 - Acquisition Parameters  
 Date\_ 20040412  
 Time 13.05  
 INSTRUM drx400  
 PROBHD 5 mm Multinucl  
 PULPROG zg30  
 TD 32768  
 SOLVENT CDCl3  
 NS 16  
 DS 2  
 SWH 4789.272 Hz  
 FIDRES 0.146157 Hz  
 AQ 3.4210291 sec  
 RG 101.6  
 DW 104.400 usec  
 DE 5.50 usec  
 TE 1809.2 K  
 D1 1.00000000 sec  
 MCREST 0.00000000 sec  
 MCWRR 0.01500000 sec

===== CHANNEL f1 =====  
 NUC1 1H  
 P1 7.70 usec  
 PL1 -6.00 dB  
 SFO1 400.1320007 MHz

F2 - Processing parameters  
 SI 16384  
 SF 400.1300000 MHz  
 WDW EM  
 SSB 0  
 LB 0.10 Hz  
 GB 0  
 PC 1.00

1D NMR plot parameters  
 CX 20.00 cm  
 CY 0.00 cm  
 F1P 8.000 ppm  
 F1 3201.04 Hz  
 F2P -0.500 ppm  
 F2 -200.07 Hz  
 PPMCM 0.42500 ppm/cm  
 HZCM 170.05525 Hz/cm

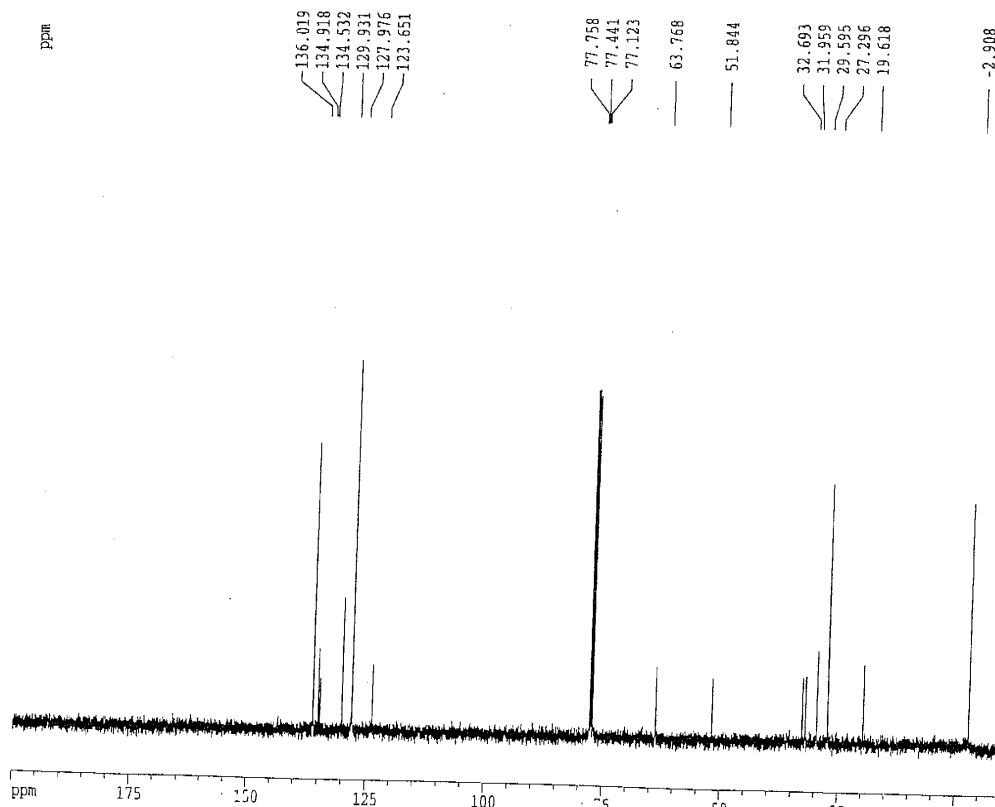

Current Data Parameters  
 NAME wj4-202  
 EXPNO 2  
 PROCNO 1

F2 - Acquisition Parameters  
 Date\_ 20040412  
 Time 13.08  
 INSTRUM drx400  
 PROBHD 5 mm Multinucl  
 PULPROG zgpg30  
 TD 65536  
 SOLVENT CDCl3  
 NS 140  
 DS 4  
 SWH 23146.148 Hz  
 FIDRES 0.353211 Hz  
 AQ 1.4156276 sec  
 RG 32768  
 DW 21.600 usec  
 DE 5.50 usec  
 TE 1809.2 K  
 D1 0.15000001 sec  
 d11 0.03000000 sec  
 DELTA 0.05000000 sec  
 MCREST 0.00000000 sec  
 MCWRR 0.01500000 sec

===== CHANNEL f1 =====  
 NUC1 13C  
 P1 12.10 usec  
 PL1 2.00 dB  
 SFO1 100.6232933 MHz

===== CHANNEL f2 =====  
 CPDPRG2 waltz16  
 NUC2 1H  
 PCPD2 100.00 usec  
 PL2 0.00 dB  
 PL12 18.00 dB  
 PL13 18.00 dB  
 SFO2 400.1316005 MHz

F2 - Processing parameters  
 SI 65536  
 SF 100.6127290 MHz  
 WDW EM  
 SSB 0  
 LB 1.00 Hz  
 GB 0  
 PC 1.40

1D NMR plot parameters  
 CX 20.00 cm  
 CY 0.00 cm  
 F1P 200.000 ppm  
 F1 20122.55 Hz  
 F2P -10.000 ppm  
 F2 -1006.13 Hz  
 PPMCM 10.50000 ppm/cm  
 HZCM 1056.43372 Hz/cm

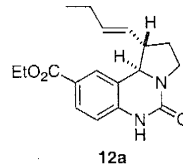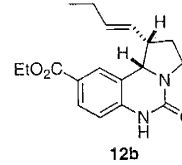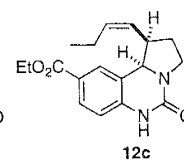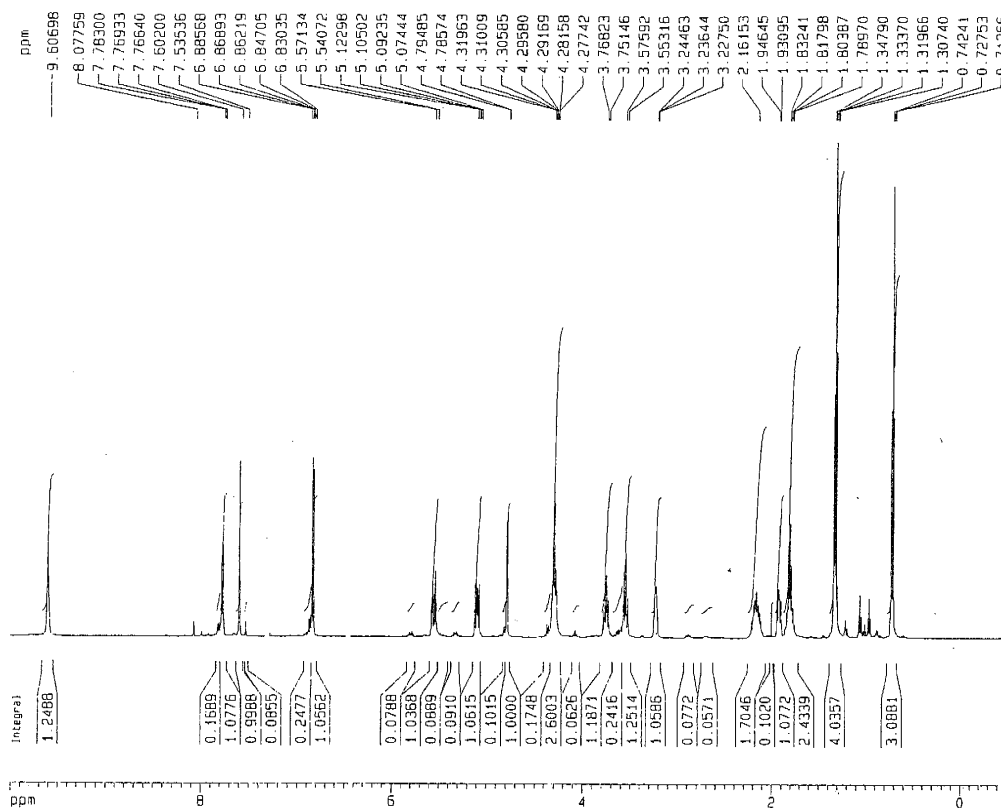

Current Data Parameters  
NAME wj3-197  
EXPNO 1  
PROCNO 1

F2 - Acquisition Parameters  
Date\_ 20030115  
Time 13.24  
INSTRUM spect  
PROBHD 5 mm BBO 90-1H  
PULPROG zgpg30  
TD 2930  
SOLVENT CDCl3  
NS 16  
DS 2  
SWH 6009.615 Hz  
FIDRES 0.183389 Hz  
AQ 2.7284309 sec  
RG 32  
DM 83.200 usec  
DE 6.00 usec  
TE 300.0 K  
D1 0.0300000 sec

\*\*\*\*\* CHANNEL f1 \*\*\*\*\*  
NUC1 1H  
P1 7.70 usec  
PL1 -4.00 dB  
SFO1 500.1300005 MHz

F2 - Processing parameters  
SI 32768  
SF 500.1300000 MHz  
WDW EM  
SSB 0  
LB 0.30 Hz  
GB 0  
PC 1.00

F1 - Processing parameters  
SI 1024  
MC2 OF  
SF 500.1300000 MHz  
WDW QSINE  
SSB 0  
LB 0.30 Hz  
GB 0

1D NMR plot parameters  
CX 20.00 cm  
CY 0.00 cm  
FIP 10.000 ppm  
F1 5001.30 Hz  
F2P -0.500 ppm  
F2 -250.07 Hz  
PPMCH 0.52500 ppm/cm  
HZCM 262.55624 Hz/cm

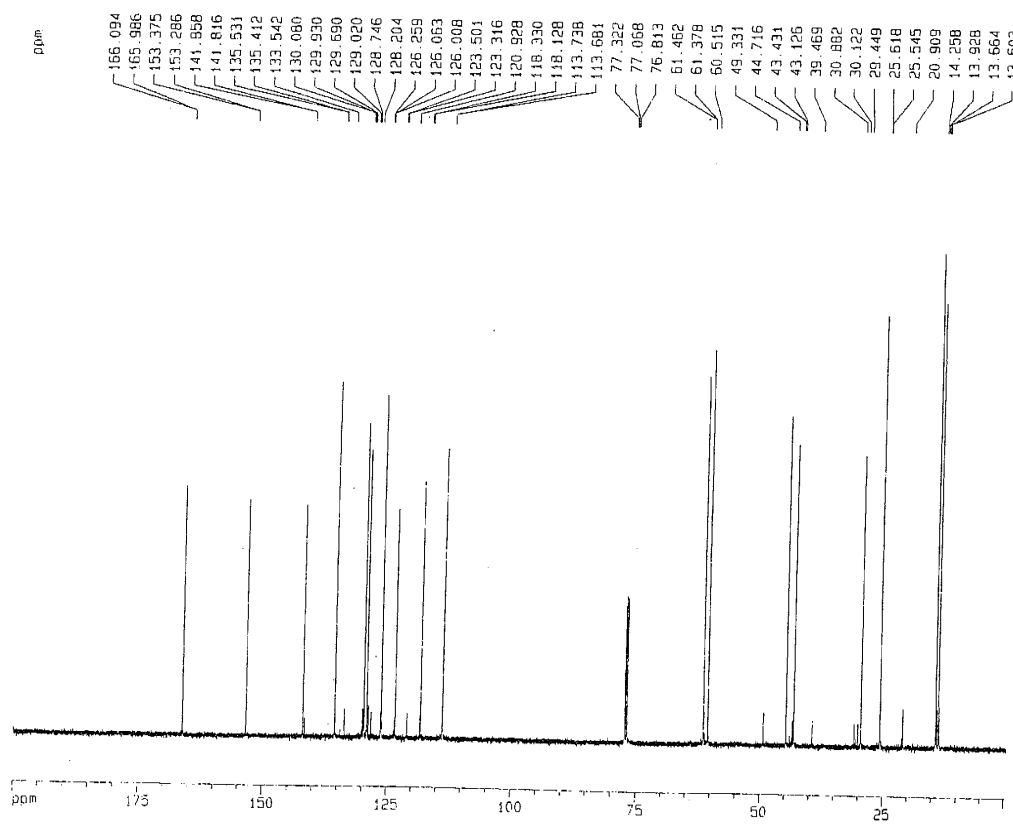

Current Data Parameters  
NAME wj3-197  
EXPNO 1  
PROCNO 1

F2 - Acquisition Parameters  
Date\_ 20030115  
Time 13.30  
INSTRUM spect  
PROBHD 5 mm BBO 90-1H  
PULPROG zgpg30  
TD 55536  
SOLVENT CDCl3  
NS 252  
DS 4  
SWH 31448.541 Hz  
FIDRES 0.478838 Hz  
AQ 1.0428883 sec  
RG 14588.5  
DM 15.900 usec  
DE 6.00 usec  
TE 300.0 K  
D1 0.1000000 sec  
D11 0.0300000 sec  
D12 0.0002000 sec

\*\*\*\*\* CHANNEL f1 \*\*\*\*\*  
NUC1 13C  
P1 6.50 usec  
PL1 5.00 dB  
SFO1 125.7718472 MHz

\*\*\*\*\* CHANNEL f2 \*\*\*\*\*  
CPDPRG2 waltz16  
NUC2 1H  
PCPD2 95.00 usec  
PL2 -4.00 dB  
PL12 19.00 dB  
PL13 38.00 dB  
SFO2 500.1325000 MHz

F2 - Processing parameters  
SI 65536  
SF 125.7578008 MHz  
WDW EM  
SSB 0  
LB 1.00 Hz  
GB 0  
PC 1.40

F1 - Processing parameters  
SI 1024  
MC2 OF  
SF 500.1300000 MHz  
WDW no  
SSB 0  
LB 0  
GB 0

1D NMR plot parameters  
CX 20.00 cm  
CY 0.00 cm  
FIP 200.000 ppm  
F1 25101.56 Hz  
F2P -0.500 ppm  
F2 -62.88 Hz  
PPMCH 0.02500 ppm/cm  
HZCM 1260.76192 Hz/cm

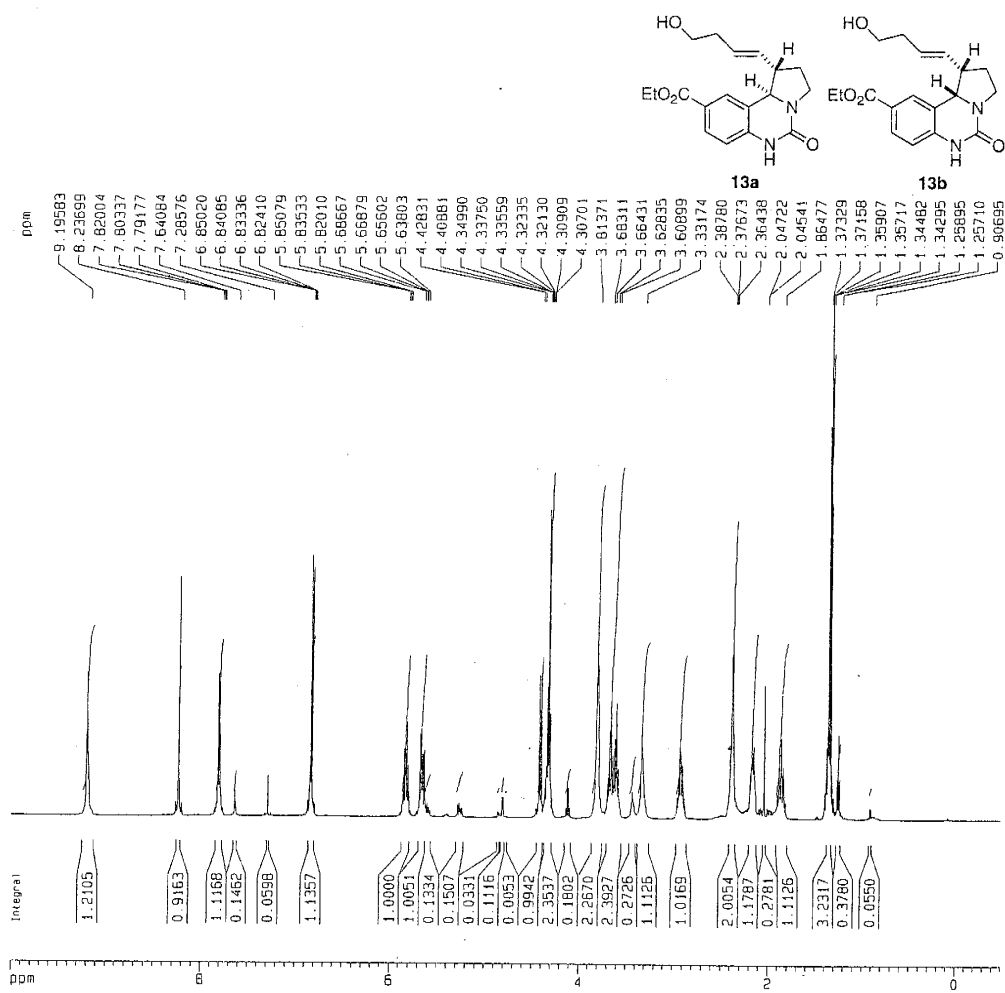

EXPNO 1  
PROCNO 1

F2 - Acquisition Parameters  
Date\_ 20010821  
Time 10.08  
INSTRUM spect  
PROBHD 5 mm BBO 85-  
PULPROG zg30  
TD 32768  
SOLVENT CDCl3  
NS 16  
DS 2  
SWH 6009.615 Hz  
FIDRES 0.183398 Hz  
AQ 2.7263477 sec  
RG 57  
DM 83.200 usec  
DE 6.00 usec  
TE 300.2 K  
D1 0.03000000 sec

----- CHANNEL f1 -----  
NUC1 1H  
P1 7.70 usec  
PL1 -4.00 dB  
SFO1 500.1320005 MHz

F1 - Acquisition parameters  
AQ 2  
TD 256  
SFO1 500.1325 MHz  
FIDRES 23.475060 Hz  
SW 12.016 ppm

F2 - Processing parameters  
SI 32768  
SF 500.1300000 MHz  
WDW EM  
SSB 0  
LB 0.30 Hz  
GB 0  
PC 1.00

F1 - Processing parameters  
SI 1024  
HC2 GF  
SF 500.1300000 MHz  
WDW NO  
SSB 0  
LB 0.30 Hz  
GB 0

1D NMR plot parameters  
CX 20.00 cm  
F1P 10.005 ppm  
F1 5005.33 Hz  
F2P -0.500 ppm  
F2 -250.07 Hz  
PWHCH 0.52540 ppm/cm  
HZCM 262.76956 Hz/cm

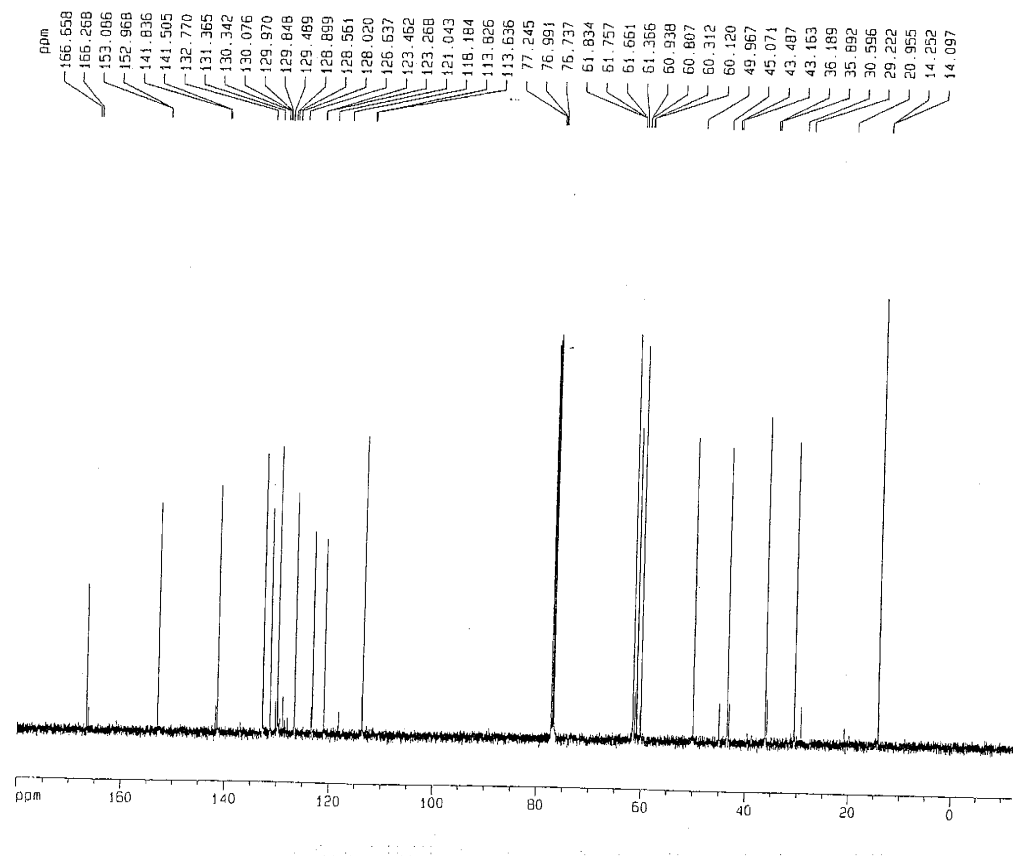

Current Data Parameters  
NAME w12-68  
EXPNO 1  
PROCNO 1

F2 - Acquisition Parameters  
Date\_ 20010821  
Time 10.14  
INSTRUM spect  
PROBHD 5 mm BBO 85-  
PULPROG zgpg30  
TD 65536  
SOLVENT CDCl3  
NS 387  
DS 4  
SWH 31446.541 Hz  
FIDRES 0.470836 Hz  
AQ 1.0480724 sec  
RG 2500.3  
DM 15.900 usec  
DE 6.00 usec  
TE 300.2 K  
D1 0.10000000 sec  
D11 0.03000000 sec  
D12 0.00002000 sec

----- CHANNEL f1 -----  
NUC1 13C  
P1 6.50 usec  
PL1 5.00 dB  
SFO1 125.7719472 MHz

----- CHANNEL f2 -----  
CPDPRG2 waltz16  
NUC2 1H  
P2 95.00 usec  
PL2 17.50 dB  
PL12 19.00 dB  
PL13 30.00 dB  
SFO2 500.1320000 MHz

F1 - Acquisition parameters  
AQ 2  
TD 256  
SFO1 500.1325 MHz  
FIDRES 23.475060 Hz  
SW 12.016 ppm

F2 - Processing parameters  
SI 65536  
SF 125.7576000 MHz  
WDW EM  
SSB 0  
LB 1.00 Hz  
GB 0  
PC 1.40

F1 - Processing parameters  
SI 1024  
HC2 GF  
SF 500.1300000 MHz  
WDW NO  
SSB 0  
LB 0.30 Hz  
GB 0

1D NMR plot parameters  
CX 20.00 cm  
F1P 100.000 ppm  
F1 22936.40 Hz  
F2P -12.539 ppm  
F2 1576.91 Hz  
PWHCH 9.62696 ppm/cm  
HZCM 1210.6657 Hz/cm

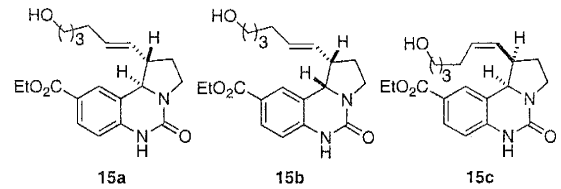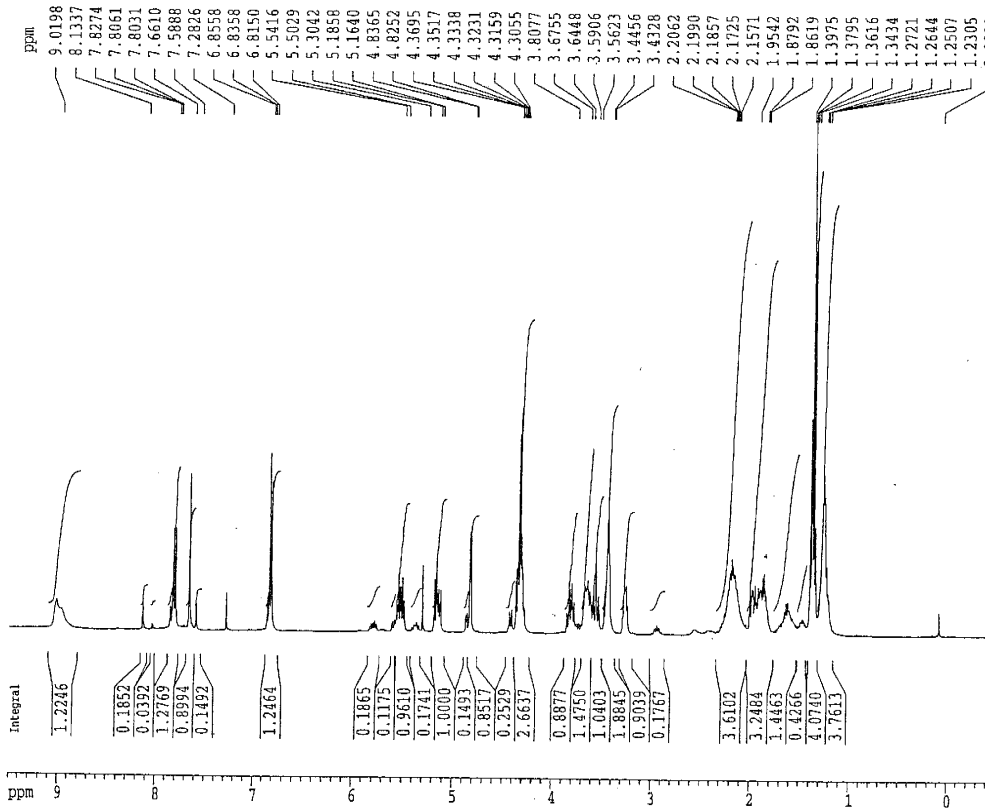

NAME wj4-56  
EXPNO 1  
PROCNO 1

F2 - Acquisition Parameters  
Date\_ 20030729  
Time 14.39  
INSTRUM drx400  
PROBHD 5 mm Multinucl  
PULPROG zg30  
TD 32768  
SOLVENT CDCl3  
NS 16  
DS 2  
SWH 4789.272 Hz  
FIDRES 0.146157 Hz  
AQ 3.4210291 sec  
RG 64  
DW 104.400 usec  
DE 4.50 usec  
TE 300.0 K  
D1 1.00000000 sec

===== CHANNEL f1 =====  
NUC1 1H  
P1 7.70 usec  
PL1 -6.00 dB  
SFO1 400.1320007 MHz

F2 - Processing parameters  
SI 16384  
SF 400.1300000 MHz  
WDW EM  
SSB 0  
LB 0.30 Hz  
GB 0  
PC 1.00

1D NMR plot parameters  
CX 20.00 cm  
CY 0.00 cm  
F1P 9.500 ppm  
F1 3801.24 Hz  
F2P -0.500 ppm  
F2 -200.07 Hz  
PPMCH 0.50000 ppm/cm  
HZCM 200.06500 Hz/cm

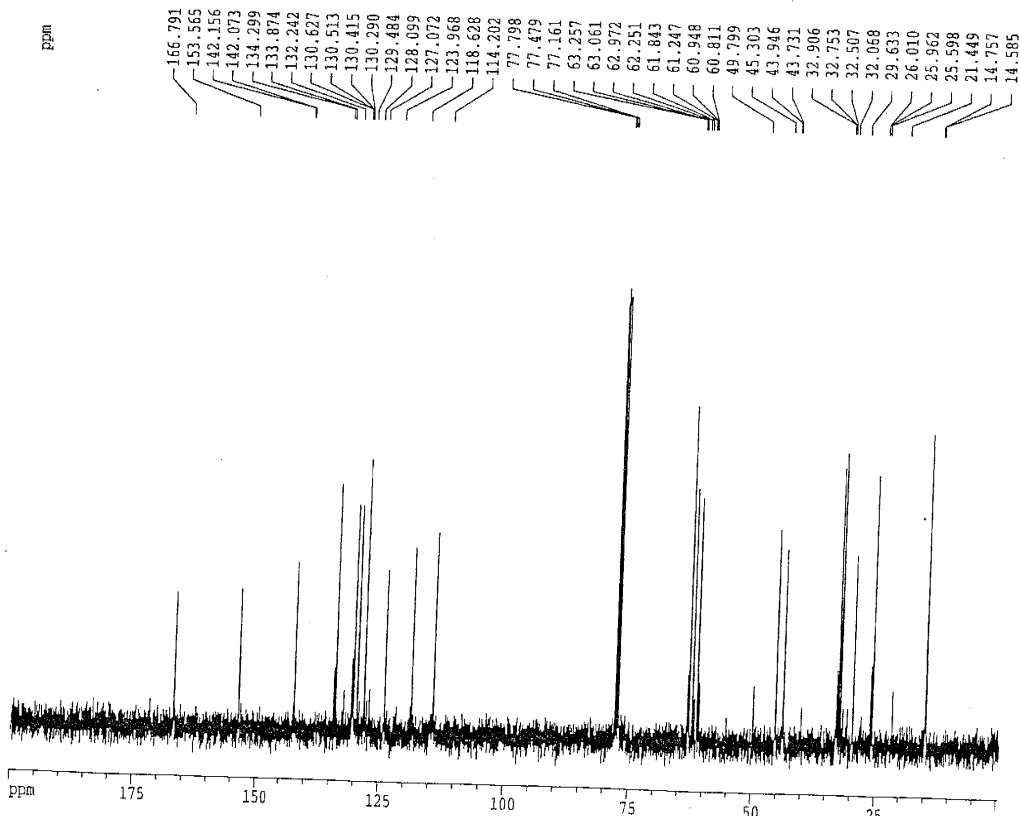

Current Data Parameters  
NAME wj4-56,6-24  
EXPNO 1  
PROCNO 1

F2 - Acquisition Parameters  
Date\_ 20030729  
Time 16.27  
INSTRUM drx400  
PROBHD 5 mm Multinucl  
PULPROG zgpg30  
TD 65536  
SOLVENT CDCl3  
NS 182  
DS 2  
SWH 23148.148 Hz  
FIDRES 0.353213 Hz  
AQ 1.4156276 sec  
RG 32768  
DW 21.600 usec  
DE 4.50 usec  
TE 300.0 K  
D1 0.05000000 sec  
d11 0.03000000 sec  
d12 0.00002000 sec

===== CHANNEL f1 =====  
NUC1 13C  
P1 12.30 usec  
PL1 2.00 dB  
SFO1 100.6232933 MHz

===== CHANNEL f2 =====  
CPDPRG2 waltz16  
NUC2 1H  
PCPD2 100.00 usec  
PL2 0.00 dB  
PL12 18.00 dB  
PL13 18.00 dB  
SFO2 400.1316005 MHz

F2 - Processing parameters  
SI 32768  
SF 100.6127290 MHz  
WDW EN  
SSB 0  
LB 1.00 Hz  
GB 0  
PC 1.40

1D NMR plot parameters  
CX 20.00 cm  
CY 0.00 cm  
F1P 200.000 ppm  
F1 20122.55 Hz  
F2P -50.31 Hz  
F2 -50.31 Hz  
PPMCH 10.02500 ppm/cm  
HZCM 1008.64264 Hz/cm

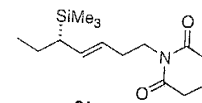

21

Current Data Parameters  
NAME w13-185  
EXPNO 1  
PROCNO 1

F2 - Acquisition Parameters  
Date\_ 20030120  
Time 12.43  
INSTRUM spect  
PROBHD 5 mm BBO BB-1H  
PULPROG zgpg30  
TD 32768  
SOLVENT CDCl3  
NS 16  
DS 2  
SWH 6009.615 Hz  
FIDRES 0.183399 Hz  
AQ 2.7264309 sec  
RG 256  
OW 83.200 usec  
DE 6.00 usec  
TE 300.0 K  
D1 0.03000000 sec

\*\*\*\*\* CHANNEL f1 \*\*\*\*\*  
NUC1 1H  
P1 7.70 usec  
PL1 -4.00 dB  
SFO1 500.1320005 MHz

F2 - Processing parameters  
SI 32768  
SF 500.1300000 MHz  
WDW EM  
SSB 0  
LB 0.30 Hz  
GB 0  
PC 1.00

F1 - Processing parameters  
SI 1024  
MC2 OF  
SF 500.1300000 MHz  
WDW OSINE  
SSB 0  
LB 0.30 Hz  
GB 0

1D NMR plot parameters  
CX 20.00 cm  
CY 0.00 cm  
F1P 8.000 ppm  
F1 4001.04 Hz  
F2P -0.500 ppm  
F2 -250.07 Hz  
PPMCH 0.42500 ppm/cm  
HZCM 212.55525 Hz/cm

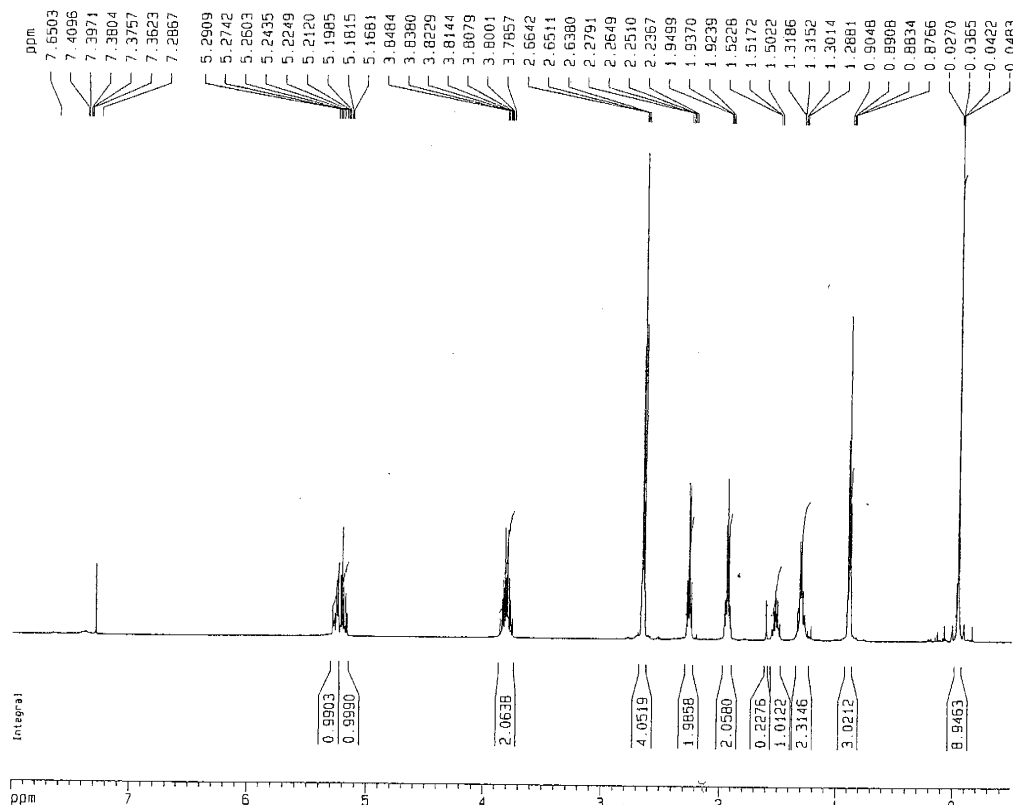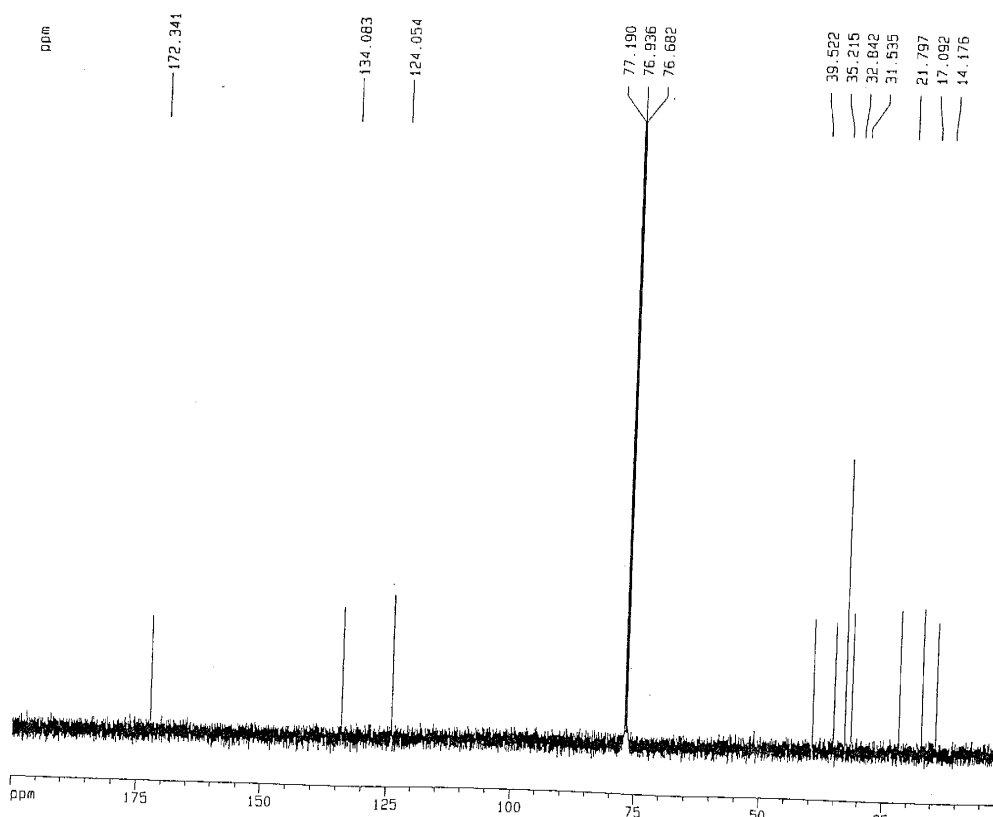

Current Data Parameters  
NAME w13-185  
EXPNO 2  
PROCNO 1

F2 - Acquisition Parameters  
Date\_ 20030120  
Time 12.48  
INSTRUM spect  
PROBHD 5 mm BBO BB-1H  
PULPROG zgpg30  
TD 65536  
SOLVENT CDCl3  
NS 256  
DS 4  
SWH 31446.541 Hz  
FIDRES 0.479836 Hz  
AQ 1.0420003 sec  
RG 18384  
OW 15.900 usec  
DE 5.00 usec  
TE 300.0 K  
D1 0.10000000 sec  
d11 0.03000000 sec  
d12 0.00002000 sec

\*\*\*\*\* CHANNEL f1 \*\*\*\*\*  
NUC1 13C  
P1 6.50 usec  
PL1 5.00 dB  
SFO1 125.7715472 MHz

\*\*\*\*\* CHANNEL f2 \*\*\*\*\*  
OPRG2 waltz16  
NUC2 1H  
PCPD2 95.00 usec  
PL2 -4.00 dB  
PL12 19.00 dB  
PL13 30.00 dB  
SFO2 500.1325000 MHz

F2 - Processing parameters  
SI 65536  
SF 125.7578008 MHz  
WDW EM  
SSB 0  
LB 1.00 Hz  
GB 0  
PC 1.40

F1 - Processing parameters  
SI 1024  
MC2 OF  
SF 500.1300000 MHz  
WDW no  
SSB 0  
LB 0.30 Hz  
GB 0

1D NMR plot parameters  
CX 20.00 cm  
CY 0.00 cm  
F1P 200.000 ppm  
F1 25151.55 Hz  
F2P -0.500 ppm  
F2 -62.08 Hz  
PPMCH 10.82500 ppm/cm  
HZCM 1260.72192 Hz/cm

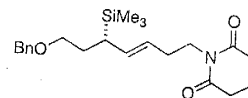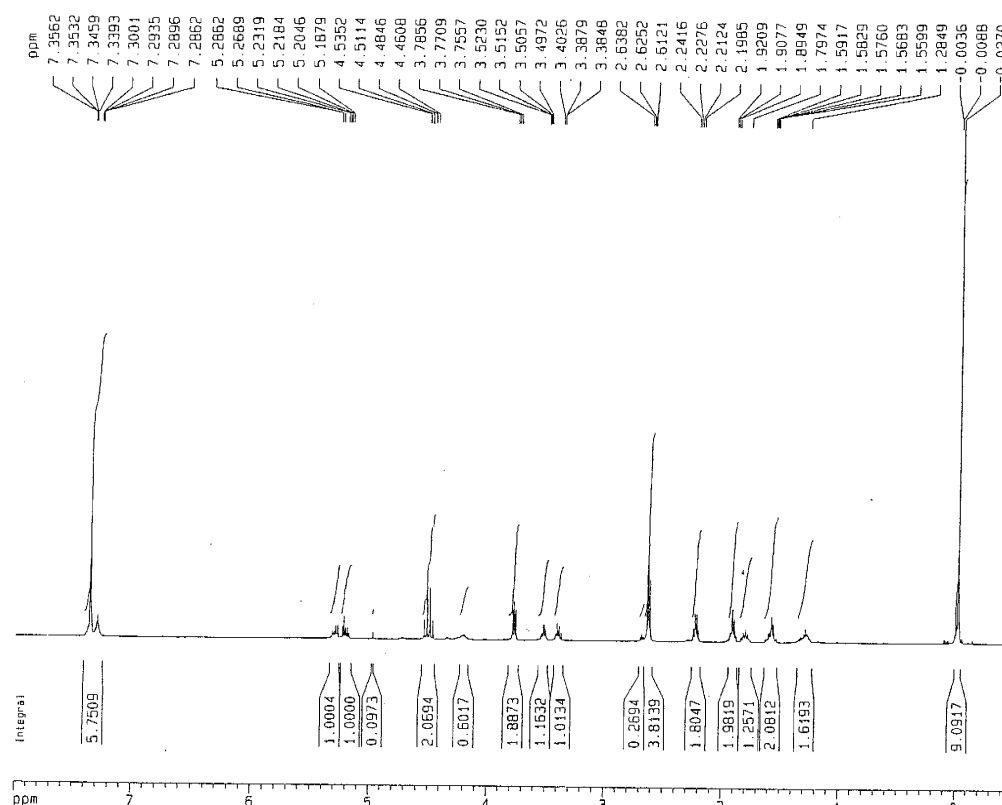

Current Data Parameters  
NAME w12-74  
EXPNO 1  
PROCNO 1

F2 - Acquisition Parameters  
Date\_ 20010902  
Time 14.47  
INSTRUM spect  
PROBHD 5 mm BBO BB-  
PULPROG zg30  
TO 6536  
SOLVENT CDCl3  
NS 16  
DS 2  
SWH 6009.615 Hz  
FIDRES 0.133399 Hz  
AQ 2.7263477 sec  
RG 57  
DM 83.200 usec  
DE 6.00 usec  
TE 300.0 K  
D1 0.0300000 sec

CHANNEL f1  
NUC1 1H  
P1 7.70 usec  
PL1 -4.00 dB  
SFO1 500.1320005 MHz

F1 - Acquisition Parameters  
AD0 2  
TO 256  
SFO1 500.1325 MHz  
FIDRES 23.475060 Hz  
SW 12.016 ppm

F2 - Processing parameters  
SI 32768  
SF 500.1300000 MHz  
WDW EM  
SSB 0  
LB 0.30 Hz  
GB 0  
PC 1.00

F1 - Processing parameters  
SI 1024  
MC2 OF  
SF 500.1300000 MHz  
WDW no  
SSB 0  
LB 0.30 Hz  
GB 0

10 NMR plot parameters  
CX 20.00 cm  
F1P 8.000 ppm  
F1 4001.04 Hz  
F2P -0.500 ppm  
F2 -250.07 Hz  
PPMCH 0.42500 ppm/cm  
HZCH 212.55525 Hz/cm

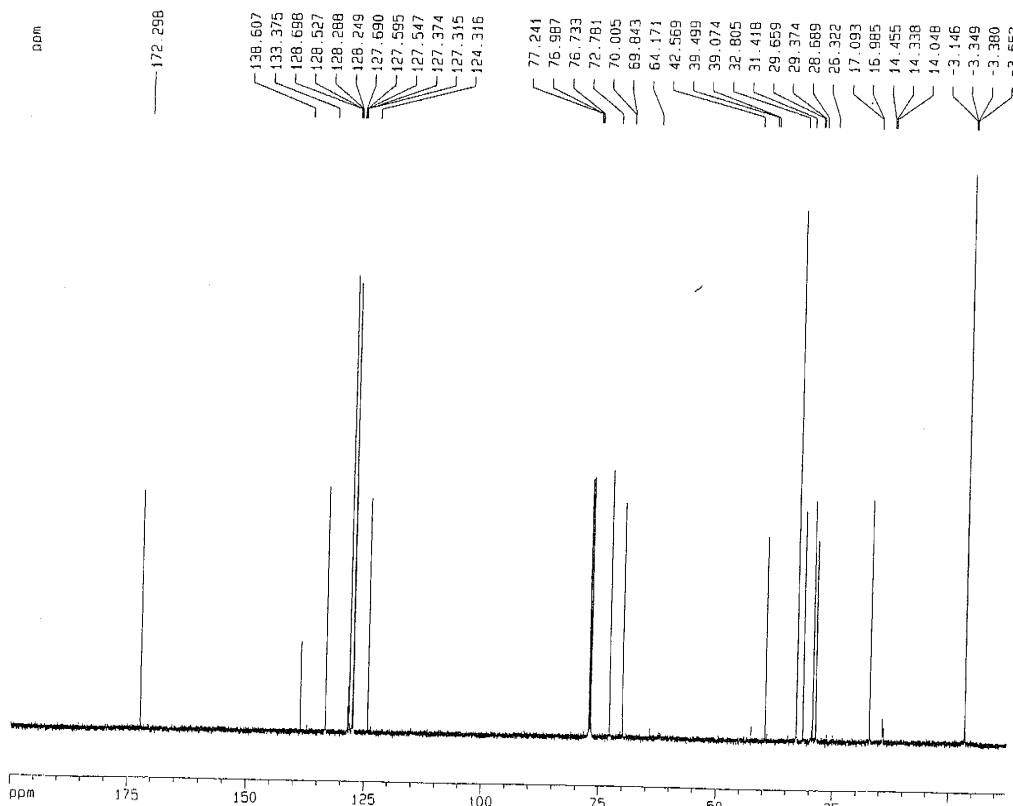

Current Data Parameters  
NAME w12-74  
EXPNO 2  
PROCNO 1

F2 - Acquisition Parameters  
Date\_ 20010902  
Time 14.58  
INSTRUM spect  
PROBHD 5 mm BBO BB-  
PULPROG zgpg30  
TO 6536  
SOLVENT CDCl3  
NS 16  
DS 4  
SWH 31446.541 Hz  
FIDRES 0.478036 Hz  
AQ 1.0420724 sec  
RG 8192  
DM 15.800 usec  
DE 6.30 usec  
TE 300.0 K  
D1 0.1000000 sec  
D11 0.0300000 sec  
D12 0.0002000 sec

CHANNEL f1  
NUC1 13C  
P1 6.50 usec  
PL1 5.00 dB  
SFO1 125.7619472 MHz

CHANNEL f2  
CPDPRG2 waltz16  
NUC2 1H  
PCPD2 95.00 usec  
PL2 17.50 dB  
PL12 19.00 dB  
PL13 30.00 dB  
SFO2 500.1325000 MHz

F1 - Acquisition parameters  
AD0 2  
TO 256  
SFO1 500.1325 MHz  
FIDRES 23.475060 Hz  
SW 12.016 ppm

F2 - Processing parameters  
SI 65536  
SF 125.7578908 MHz  
WDW EM  
SSB 0  
LB 1.00 Hz  
GB 0  
PC 1.40

F1 - Processing parameters  
SI 1024  
MC2 OF  
SF 500.1300000 MHz  
WDW no  
SSB 0  
LB 0.30 Hz  
GB 0

10 NMR plot parameters  
CX 20.00 cm  
F1P 200.000 ppm  
F1 25151.56 Hz  
F2P -12.538 ppm  
F2 -1976.91 Hz  
PPMCH 19.60888 ppm/cm  
HZCH 1336.42358 Hz/cm

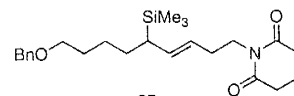

25

Current Data Parameters  
NAME wj3-286  
EXPNO 1  
PROCNO 1

F2 - Acquisition Parameters  
Date\_ 20030505  
Time 13.56  
INSTRUM drx400  
PROBHD 5 mm Multinucl  
PULPROG zg30  
TD 32768  
SOLVENT CDCl3  
DS 2  
SWH 4789.272 Hz  
FIDRES 0.146157 Hz  
AQ 3.4210291 sec  
RG 64  
DW 104.400 usec  
DE 4.50 usec  
TE 300.0 K  
D1 1.00000000 sec

===== CHANNEL f1 =====  
NUC1 1H  
P1 7.70 usec  
PL1 -6.00 dB  
SFO1 400.1320007 MHz

F2 - Processing parameters  
SI 16384  
SF 400.1300000 MHz  
WDW EM  
SSB 0  
LB 0.30 Hz  
GB 0  
PC 1.00

1D NMR plot parameters  
CX 20.00 cm  
CY 0.00 cm  
F1P 8.000 ppm  
F1 3201.04 Hz  
F2P -0.500 ppm  
F2 -200.07 Hz  
PPMCM 0.42500 ppm/cm  
HZCM 170.05525 Hz/cm

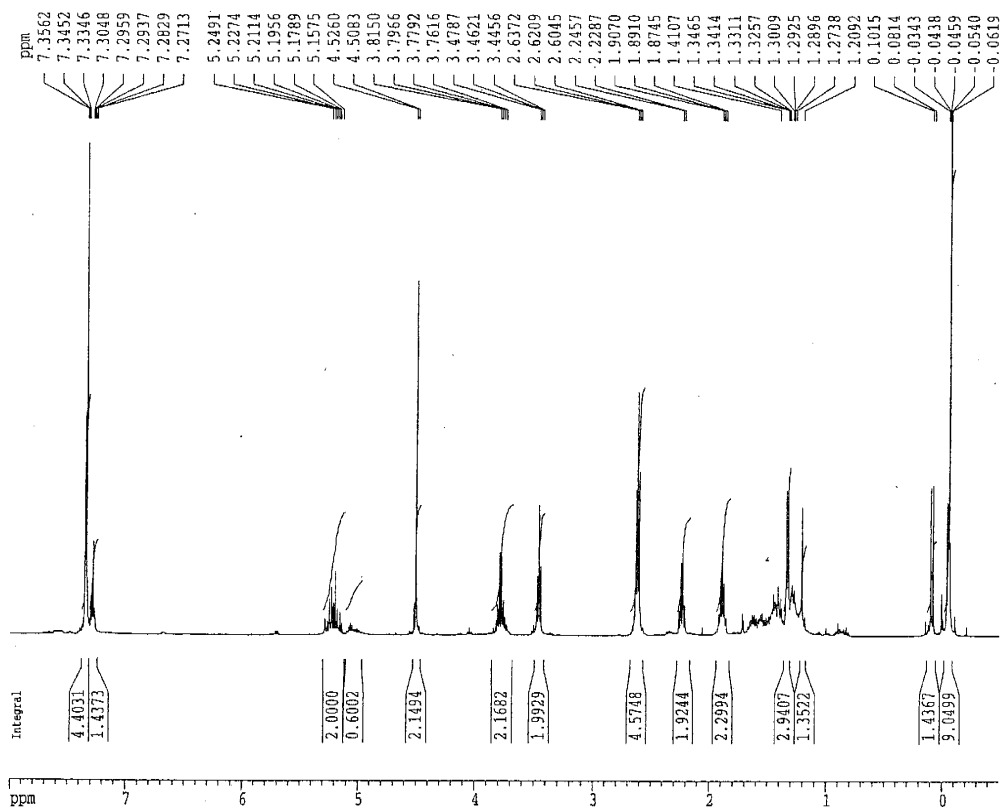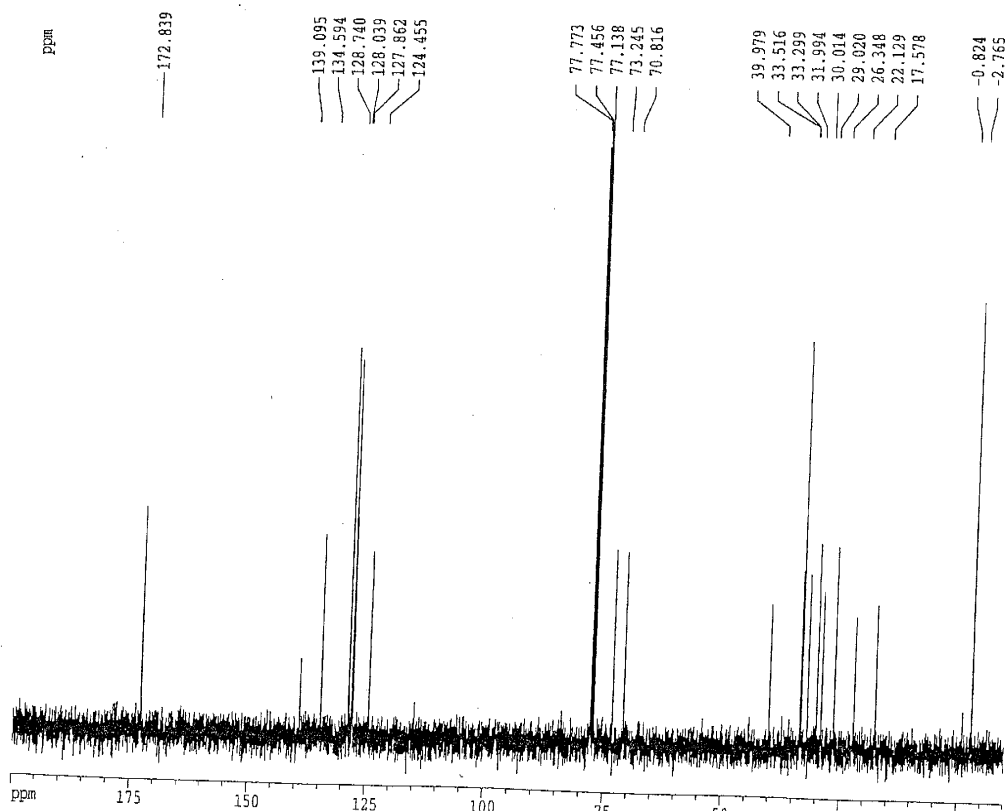

Current Data Parameters  
NAME wj3-286  
EXPNO 2  
PROCNO 1

F2 - Acquisition Parameters  
Date\_ 20030505  
Time 13.59  
INSTRUM drx400  
PROBHD 5 mm Multinucl  
PULPROG zgpg30  
TD 65536  
SOLVENT CDCl3  
DS 2  
SWH 23146.148 Hz  
FIDRES 0.353213 Hz  
AQ 1.4156276 sec  
RG 32768  
DW 21.600 usec  
DE 4.50 usec  
TE 300.0 K  
D1 0.05000000 sec  
d11 0.03000000 sec  
d12 0.00602000 sec

===== CHANNEL f1 =====  
NUC1 13C  
P1 12.30 usec  
PL1 2.00 dB  
SFO1 100.6232933 MHz

===== CHANNEL f2 =====  
CPDPRG2 waltz16  
NUC2 1H  
PCPD2 100.00 usec  
PL2 0.00 dB  
PL12 18.00 dB  
PL13 18.00 dB  
SFO2 400.1316005 MHz

F2 - Processing parameters  
SI 32768  
SF 100.6127290 MHz  
WDW EM  
SSB 0  
LB 1.00 Hz  
GB 0  
PC 1.40

1D NMR plot parameters  
CX 20.00 cm  
CY 0.00 cm  
F1P 200.000 ppm  
F1 20122.55 Hz  
F2P -10.800 ppm  
F2 -1006.13 Hz  
PPMCM 16.50000 ppm/cm  
HZCM 1056.43372 Hz/cm

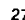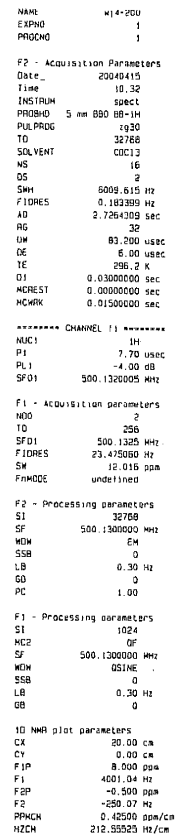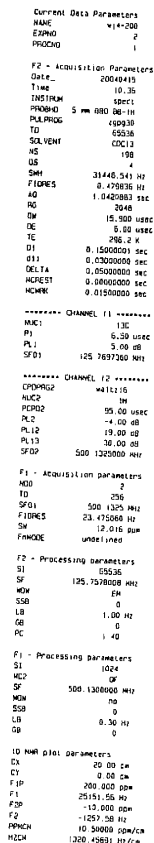

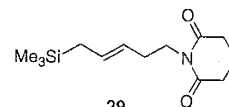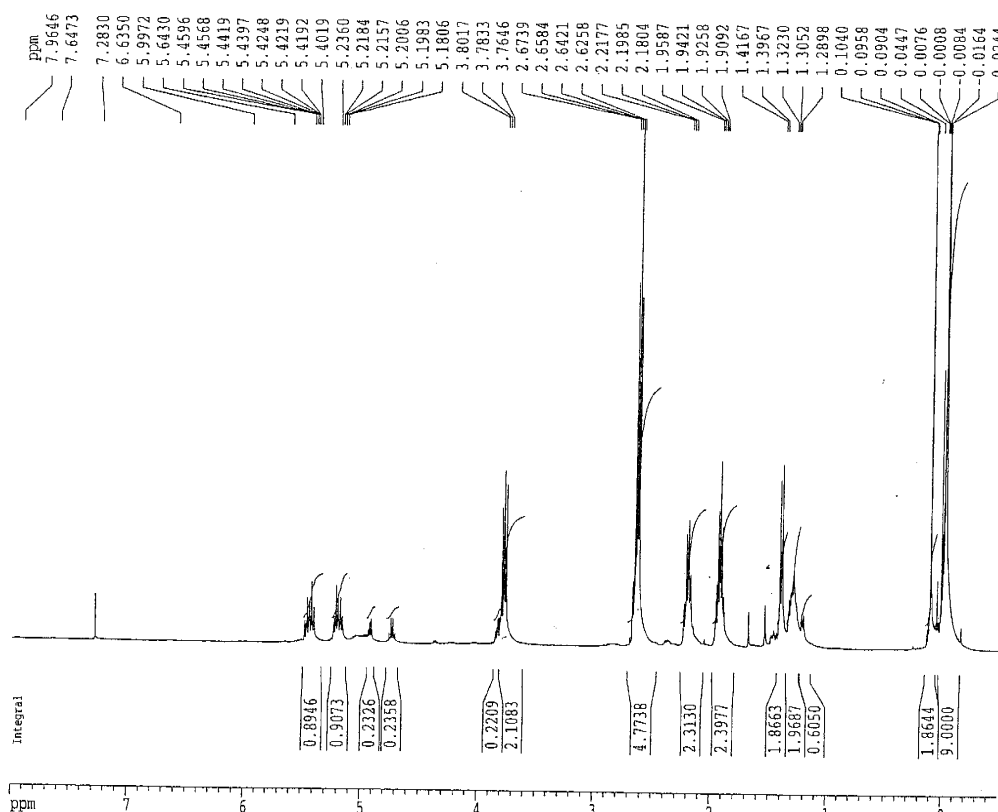

Current Data Parameters  
NAME wj3-200  
EXPNO 1  
PROCNO 1

F2 - Acquisition Parameters  
Date\_ 20030122  
Time 12.33  
INSTRUM drx400  
PROBHD 5 mm Multinucl  
PULPROG zg30  
TD 32768  
SOLVENT CDCl3  
NS 16  
DS 2  
SWH 4789.272 Hz  
FIDRES 0.146157 Hz  
AQ 3.4210291 sec  
RG 101.6  
DW 104.400 usec  
DE 4.50 usec  
TE 300.0 K  
D1 1.00000000 sec

===== CHANNEL f1 =====  
NUC1 1H  
P1 7.70 usec  
PL1 -6.00 dB  
SFO1 400.1320007 MHz

F2 - Processing parameters  
SI 16384  
SF 400.1300000 MHz  
WDW EM  
SSB 0  
LB 0.30 Hz  
GB 0  
PC 1.00

1D NMR plot parameters  
CX 20.00 cm  
CY 0.00 cm  
F1P 8.000 ppm  
F1 3201.04 Hz  
F2P -0.500 ppm  
F2 -200.07 Hz  
PPMCM 0.42500 ppm/cm  
HZCM 170.05525 Hz/cm

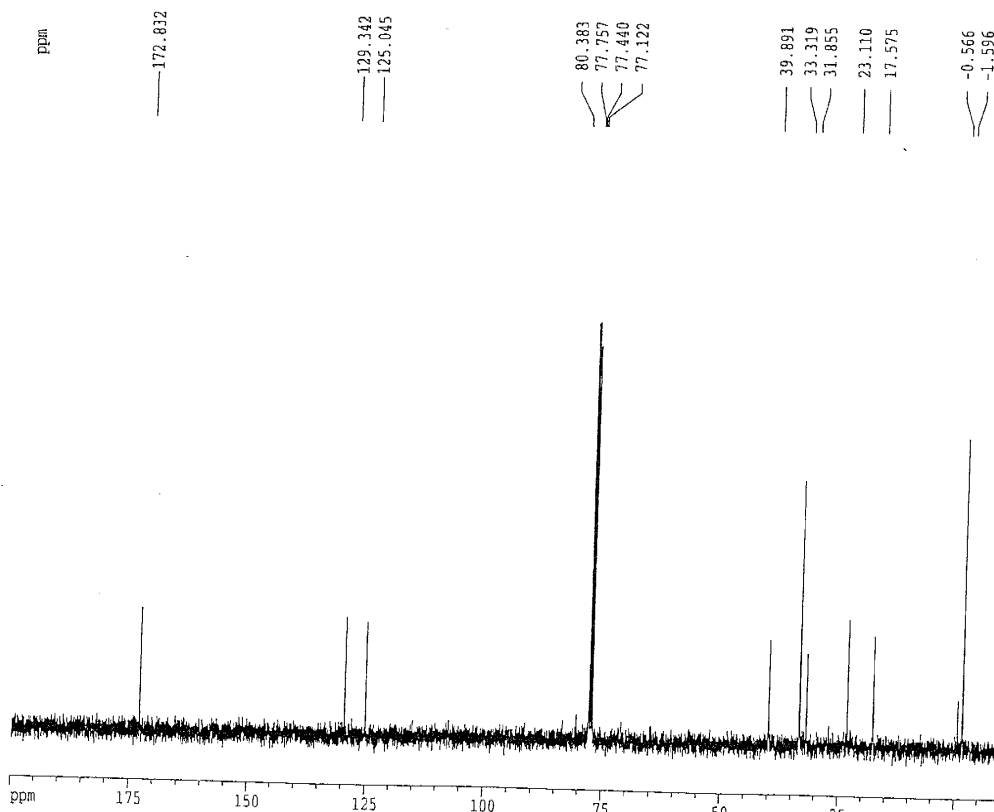

Current Data Parameters  
NAME wj3-200  
EXPNO 2  
PROCNO 1

F2 - Acquisition Parameters  
Date\_ 20030122  
Time 12.19  
INSTRUM drx400  
PROBHD 5 mm Multinucl  
PULPROG zgpg30  
TD 65536  
SOLVENT CDCl3  
NS 263  
DS 2  
SWH 23148.148 Hz  
FIDRES 0.353213 Hz  
AQ 1.4155276 sec  
RG 574.7  
DW 21.600 usec  
DE 4.50 usec  
TE 300.0 K  
D1 0.05000000 sec  
d11 0.03000000 sec  
d12 0.00002000 sec

===== CHANNEL f1 =====  
NUC1 13C  
P1 12.10 usec  
PL1 2.00 dB  
SFO1 100.6232933 MHz

===== CHANNEL f2 =====  
CPOPRG2 waltz16  
NUC2 1H  
PCPD2 100.00 usec  
PL2 0.00 dB  
PL12 18.00 dB  
PL13 18.00 dB  
SFO2 400.1316005 MHz

F2 - Processing parameters  
SI 32768  
SF 100.6127890 MHz  
WDW EM  
SSB 0  
LB 1.00 Hz  
GB 0  
PC 1.40

1D NMR plot parameters  
CX 20.00 cm  
CY 0.00 cm  
F1P 200.000 ppm  
F1 20122.55 Hz  
F2P -10.036 ppm  
F2 -1009.74 Hz  
PPMCM 10.50179 ppm/cm  
HZCM 1056.61401 Hz/cm

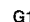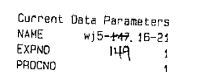

```

F2 - Acquisition Parameters
Date_      20050323
Time       17.18
INSTRUM    spect
PROBHD     5 mm QNP 1H/15
PULPROG    zg30
TO         32768
SOLVENT    CDCl3
NS         16
DS         2
SWH         4789.272 Hz
FIDRES     0.146157 Hz
AQ         3.421091 sec
RG         90.5
DE         104.40 usec
DW         6.00 usec
TE         297.1 K
D1         1.00000000 sec
MCAREST    0.00000000 sec
MCMWRK     0.01500000 sec

```

```
===== CHANNEL f1 =====
NUC1              1H
P1                 7.05 usec
PL1                -3.00 dB
SF01              400.1320007 MHz
```

```
F2 - Processing parameters
SI                      32768
SF                      400.1300000 MHz
K0W                     EM
SS0                      0
LB                      0.30 Hz
GB                      0
PC                      1.00
```

```

10 NMR plot parameters
CX              20.00 cm
CY              0.00 cm
F1P            6.000 ppm
F1             3201.04 Hz
F2P            -0.500 ppm
F2            -200.67 Hz
PMCHM          0.42500 ppm/cm
ZCM            170.05525 Hz/cm

```

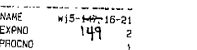

```

2- Acquisition Parameters
Date_      20050323
Time       17.24
INSTRUM    spect
PROB-H1    5 mm QNP 1H/1
PULPROG    zgpg30
D0          0.55335
SOLVENT     CDCl3
NS          382
DS          4
AQ          23900.814 Hz
RG          0.365918 Hz
AQ          1.3664756 sec
RG          20.48
AQ          20.850 usec
RG          6.00 usec
RG          297.2 K
RG          0.15000001 sec
RG          0.03000000 sec
RG          0.05000000 sec
RG          0.00000000 sec
RG          0.01500000 sec

```

```
===== CHANNEL f1 =====
C1          13C
              7.20 usec
              -2.00 dB
D1          100.6228298 MHz
```

```
===== CHANNEL 12 =====
IPRG2      waltz16
02          1H
           98.40 usec
           -3.00 dB
2           19.96 dB
3           120.00 dB
2           400.136005 MHz
```

```
- Processing parameters
      32768
    100.6127690 MHz
      EM
      0
    1.00 Hz
      0
    1.40
```

```

HA plot parameters
      20.00 cm
      0.00 cm
      200.000 ppm
      20122.55 Hz
      -10.000 ppm
      -1008.13 Hz
      10.50000 ppm/cm
      1056.43408 Hz/cm

```

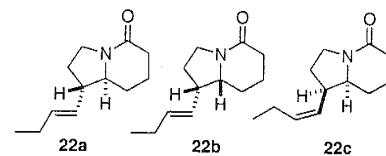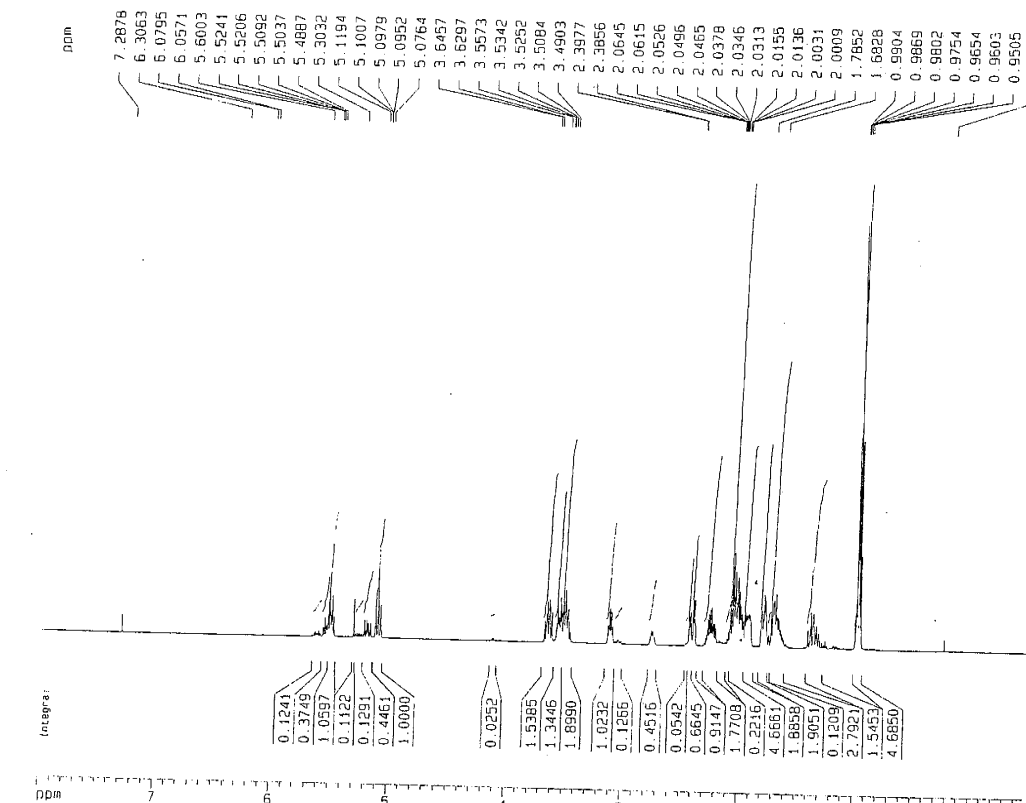

NAME: 22a  
EXPNO: 1  
PROCNO: 1

F2 - Acquisition Parameters  
Date\_: 20030628  
Time: 16.56  
INSTRUM: spect  
PROBHD: 5 mm BBO BB-1H  
PULPROG: zg30  
TD: 32768  
SOLVENT: CDCl<sub>3</sub>  
NS: 16  
DS: 2  
SWH: 6009.615 Hz  
FIDRES: 0.183398 Hz  
AQ: 2.7264309 sec  
RG: 80.6  
DW: 83.200 usec  
DE: 6.00 usec  
TE: 300.0 K  
D1: 0.03000000 sec

\*\*\*\*\* CHANNEL f1 \*\*\*\*\*  
NUC1: 1H  
P1: 7.70 usec  
PL1: -4.00 dB  
SFO1: 500.1320005 MHz

F2 - Processing parameters  
SI: 32768  
SF: 500.1300000 MHz  
WDW: EM  
SSB: 0  
LB: 0.30 Hz  
GB: 0  
PC: 1.00

F1 - Processing parameters  
SI: 1024  
MC2: OF  
SF: 500.1300000 MHz  
WDW: OSLINE  
SSB: 0  
LB: 0.30 Hz  
GB: 0

1D NMR plot parameters  
CX: 20.00 cm  
CY: 0.00 cm  
FJP: 8.000 ppm  
F1: 4001.04 Hz  
F2: -0.500 ppm  
F3: -250.07 Hz  
PRNCD: 0.42500 ppm/cm  
HZCM: 212.55325 Hz/cm

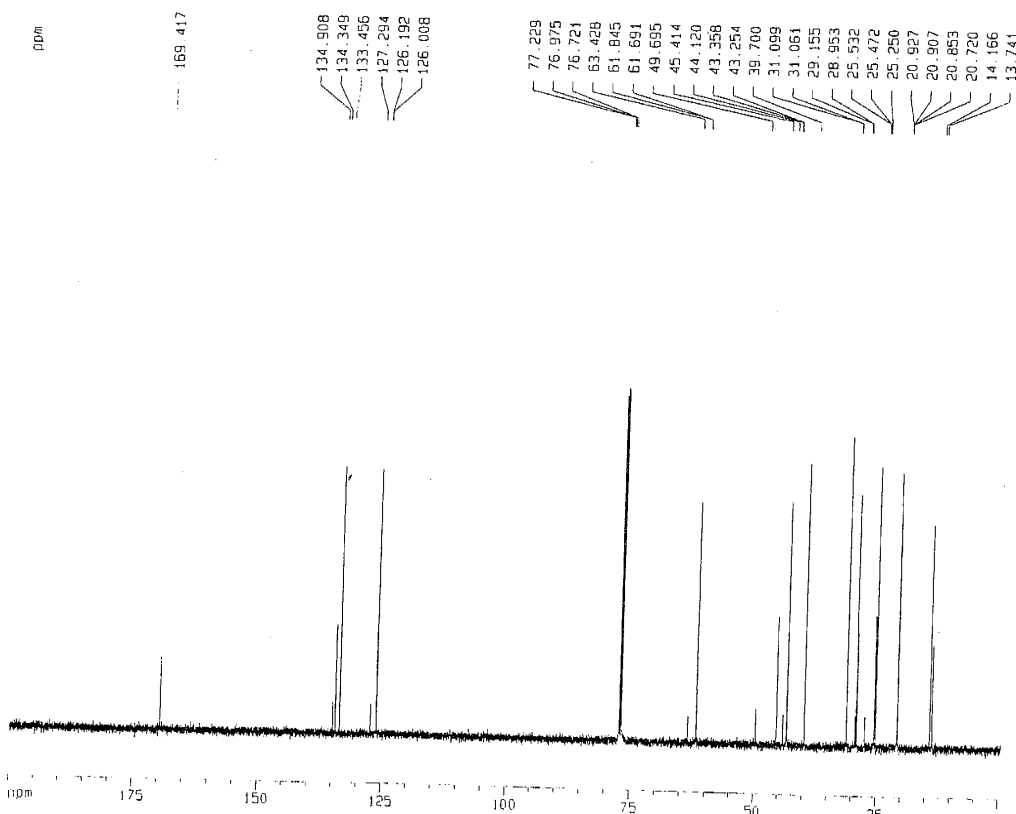

Current Data Parameters  
NAME: 22a  
EXPNO: 2  
PROCNO: 1

F2 - Acquisition Parameters  
Date\_: 20030628  
Time: 17.02  
INSTRUM: spect  
PROBHD: 5 mm BBO BB-1H  
PULPROG: zg30  
TD: 65536  
SOLVENT: CDCl<sub>3</sub>  
NS: 341  
DS: 4  
SWH: 21446.341 Hz  
FIDRES: 0.470836 Hz  
AQ: 1.0408883 sec  
RG: 2048  
DW: 15.900 usec  
DE: 6.00 usec  
TE: 300.0 K  
D1: 0.10000000 sec  
D11: 0.03000000 sec  
D12: 0.05000000 sec

\*\*\*\*\* CHANNEL f1 \*\*\*\*\*  
NUC1: 13C  
P1: 15.50 usec  
PL1: 5.00 dB  
SFO1: 125.7710472 MHz

\*\*\*\*\* CHANNEL f2 \*\*\*\*\*  
CPDPRG2: waltz16  
NUC2: 1H  
PCPD2: 95.00 usec  
PL2: -0.00 dB  
PL12: 15.00 dB  
PL13: 30.00 dB  
SFO2: 500.1325000 MHz

F2 - Processing parameters  
SI: 65536  
SF: 125.7578008 MHz  
WDW: EM  
SSB: 0  
LB: 1.00 Hz  
GB: 0  
PC: 1.40

F1 - Processing parameters  
SI: 1024  
MC2: OF  
SF: 500.1300000 MHz  
WDW: EM  
SSB: 0  
LB: 0.30 Hz  
GB: 0

1D NMR plot parameters  
CX: 20.00 cm  
CY: 0.00 cm  
FJP: 200.000 ppm  
F1: 25131.46 Hz  
F2: -0.500 ppm  
F3: -62.88 Hz  
PRNCD: 0.02500 ppm/cm  
HZCM: 1202.7195 Hz/cm

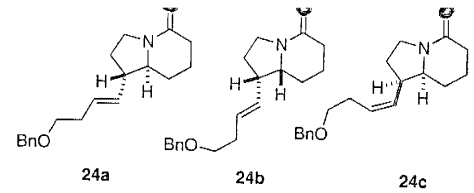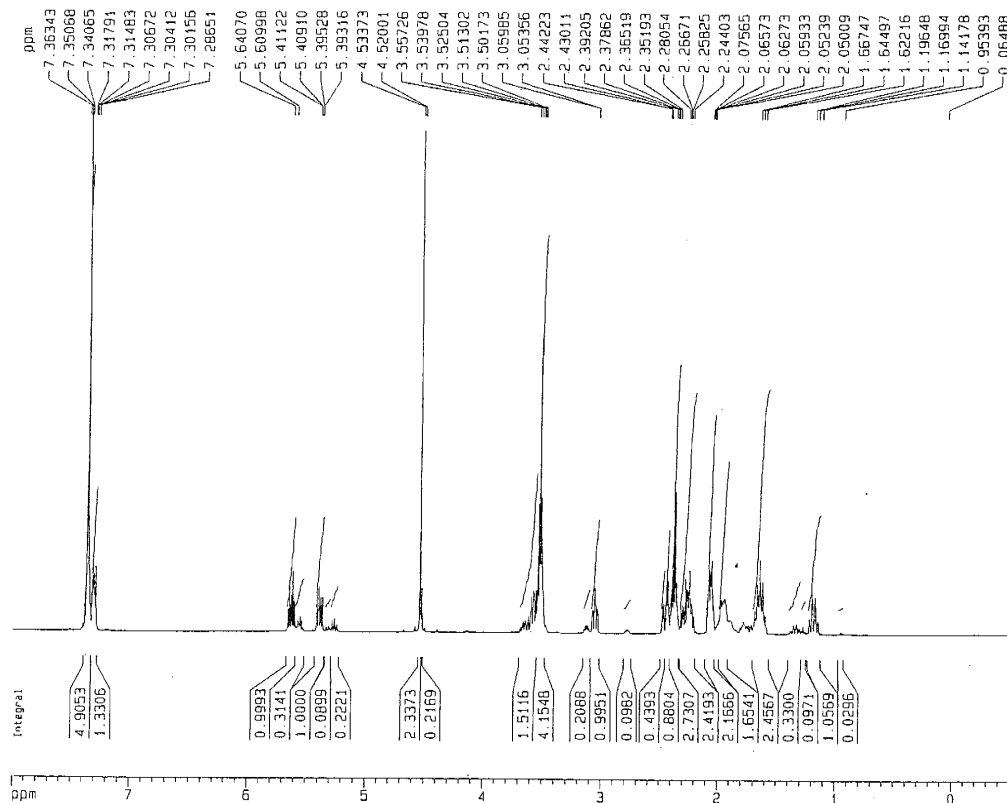

Current Data Parameters  
NAME wj3-126  
EXPNO 1  
PROCNO 1

F2 - Acquisition Parameters  
Date\_ 20020920  
Time 11.00  
INSTRUM spect  
PROBHD 5 mm BBO BB-1H  
PULPROG zg30  
TD 32768  
SOLVENT CUC13  
NS 16  
DS 2  
SWH 6009.615 Hz  
FIDRES 0.183399 Hz  
AQ 2.7264309 sec  
RG 128  
DW 83.200 usec  
DE 6.00 usec  
TE 300.0 K  
D1 0.93000000 sec

\*\*\*\*\* CHANNEL f1 \*\*\*\*\*  
NUC1 1H  
P1 7.70 usec  
PL1 -4.00 dB  
SF01 500.1320005 MHz

F2 - Processing parameters  
SI 32768  
SF 500.1300000 MHz  
WDW EM  
SSB 0  
LB 0.30 Hz  
GB 0  
PC 1.00

F1 - Processing parameters  
SI 1024  
MC2 OF  
SF 500.1300000 MHz  
WDW GSINE  
SSB 0  
LB 0.30 Hz  
GB 0

1D NMR plot parameters  
CX 20.00 cm  
CY 0.00 cm  
F1P 8.000 ppm  
F1 4001.04 Hz  
F2P -0.500 ppm  
F2 -250.07 Hz  
PFMCM 0.42500 ppm/cm  
HZCM 212.55525 Hz/cm

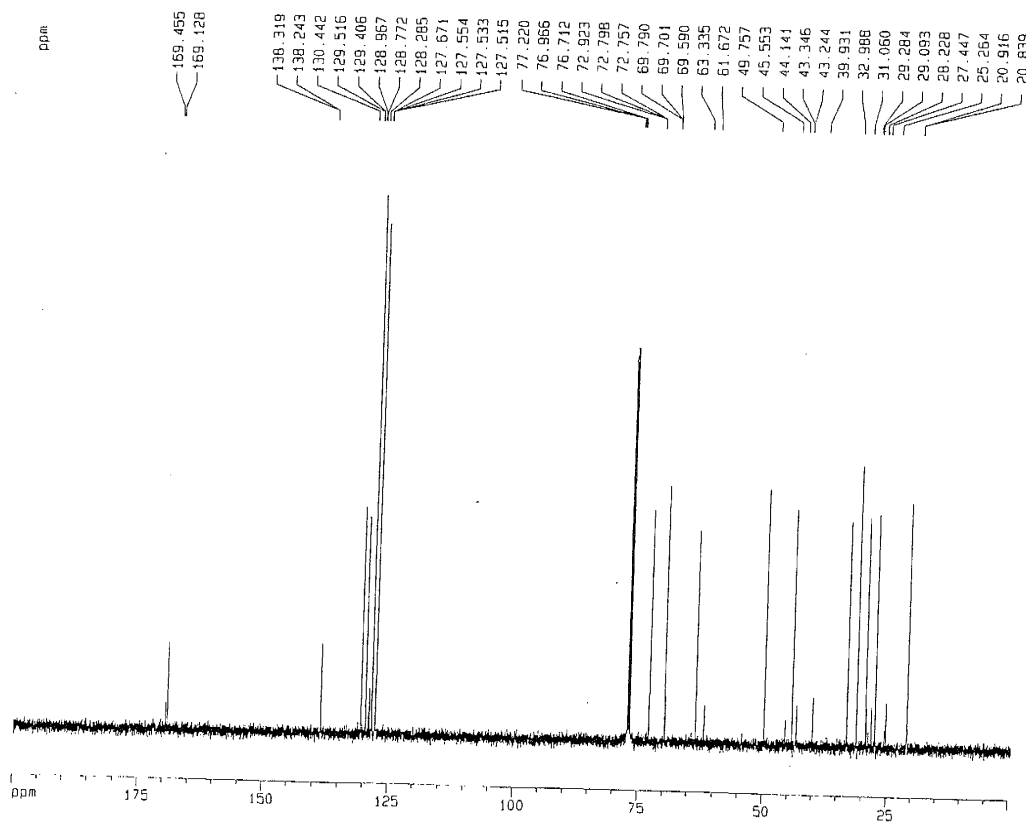

Current Data Parameters  
NAME wj3-126  
EXPNO 1  
PROCNO 1

F2 - Acquisition Parameters  
Date\_ 20020920  
Time 11.00  
INSTRUM spect  
PROBHD 5 mm BBO BB-1H  
PULPROG zgpg30  
TD 65536  
SOLVENT CUC13  
NS 422  
DS 4  
SWH 31446.541 Hz  
FIDRES 0.478836 Hz  
AQ 1.0420803 sec  
RG 15  
DW 14596.5 usec  
DE 5.00 usec  
TE 300.0 K  
D1 0.10000000 sec  
d11 0.03000000 sec  
d12 0.00002000 sec

\*\*\*\*\* CHANNEL f1 \*\*\*\*\*  
NUC1 13C  
P1 6.20 usec  
PL1 5.00 dB  
SF01 125.7719472 MHz

\*\*\*\*\* CHANNEL f2 \*\*\*\*\*  
CPDPRG2 waltz16  
NUC2 1H  
PCPD2 99.00 usec  
PL2 -4.00 dB  
PL12 19.00 dB  
PL13 30.00 dB  
SF02 500.1325000 MHz

F2 - Processing parameters  
SI 65536  
SF 125.7578000 MHz  
WDW EM  
SSB 0  
LB 1.00 Hz  
GB 0  
PC 1.40

F1 - Processing parameters  
SI 1024  
MC2 OF  
SF 500.1300000 MHz  
WDW - no  
SSB 0  
LB 0.30 Hz  
GB 0

1D NMR plot parameters  
CX 20.00 cm  
CY 0.00 cm  
F1P 200.000 ppm  
F1 25151.56 Hz  
F2P -0.500 ppm  
F2 -42.88 Hz  
PFMCM 10.02500 ppm/cm  
HZCM 1800.72192 Hz/cm

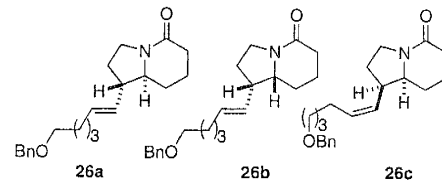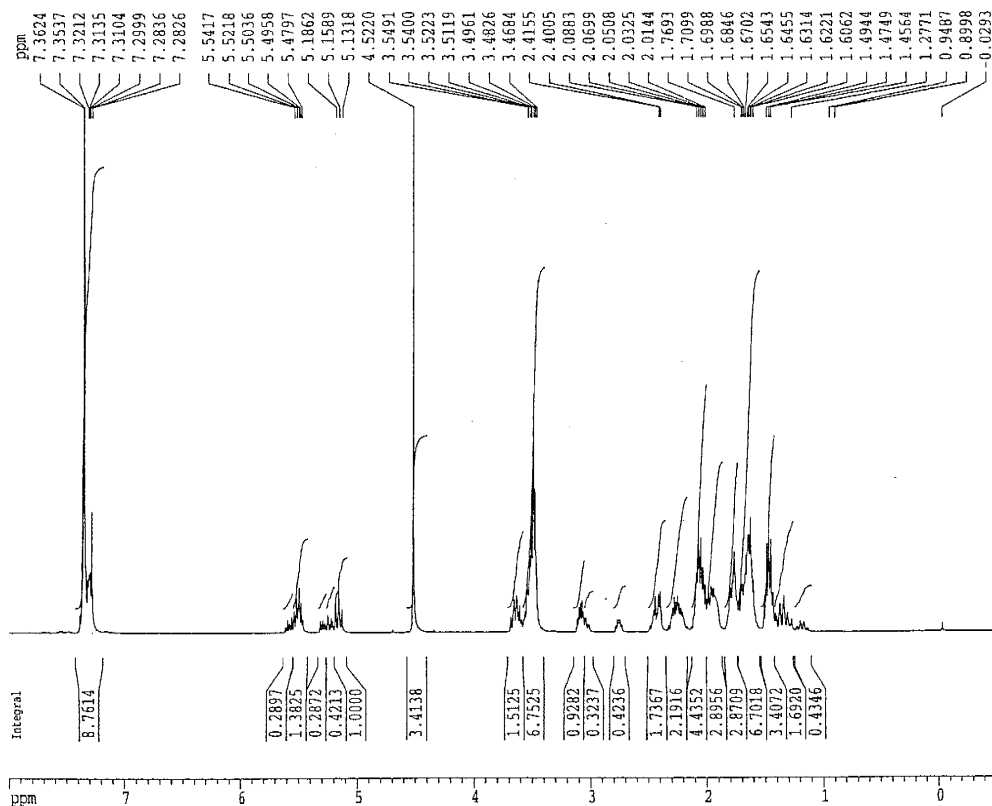

Current Data Parameters  
NAME wj4-53  
EXPNO 1  
PROCNO 1

F2 - Acquisition Parameters  
Date\_ 20030729  
Time 14.23  
INSTRUM drx400  
PROBHD 5 mm Multinuc1  
PULPROG zg30  
TD 32768  
SOLVENT CDCl3  
NS 16  
DS 2  
SWH 4789.272 Hz  
FIDRES 0.146157 Hz  
AQ 3.4210291 sec  
RG 143.7  
DW 104.400 usec  
DE 4.50 usec  
TE 300.0 K  
D1 1.00000000 sec

===== CHANNEL f1 =====  
NUC1 1H  
P1 7.70 usec  
PL1 -6.00 dB  
SFO1 400.1320007 MHz

F2 - Processing parameters  
SI 16384  
SF 400.1300000 MHz  
WDW EM  
SSB 0  
LB 0.30 Hz  
GB 0  
PC 1.00

1D NMR plot parameters  
CX 20.00 cm  
CY 0.00 cm  
F1P 8.000 ppm  
F1 3201.04 Hz  
F2P -0.500 ppm  
F2 -200.07 Hz  
PPMCH 0.42500 ppm/cm  
HZCM 170.05525 Hz/cm

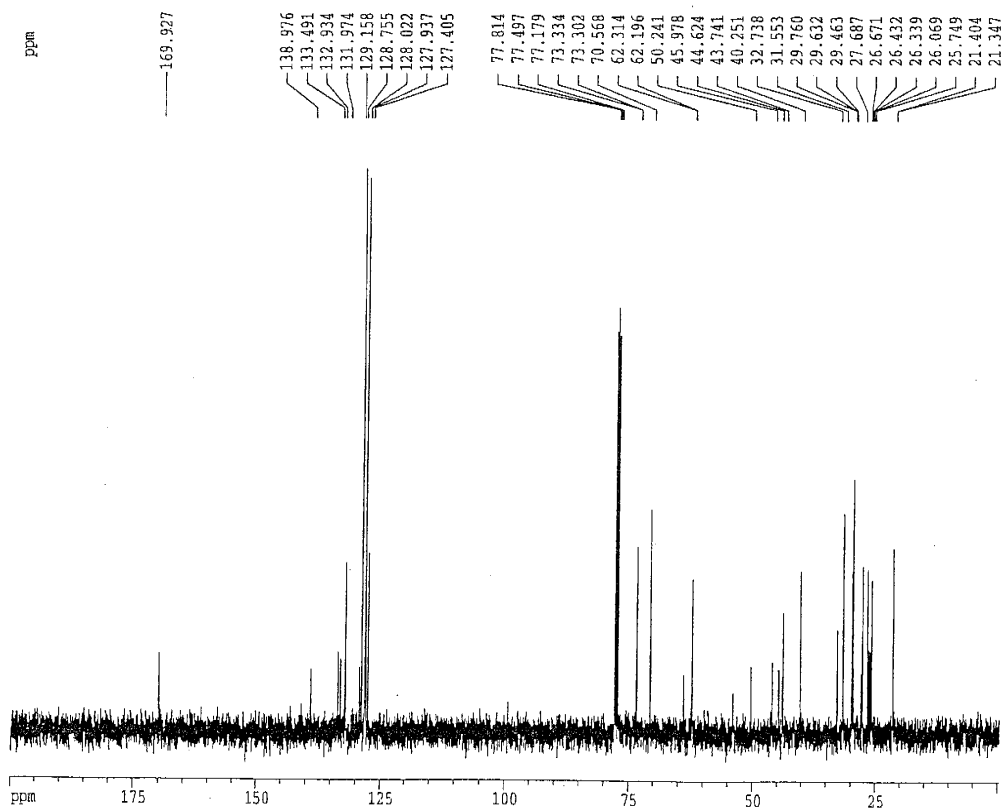

Current Data Parameters  
NAME wj4-53  
EXPNO 2  
PROCNO 1

F2 - Acquisition Parameters  
Date\_ 20030729  
Time 16.20  
INSTRUM drx400  
PROBHD 5 mm Multinuc1  
PULPROG zgpg30  
TD 65536  
SOLVENT CDCl3  
NS 105  
DS 2  
SWH 23148.148 Hz  
FIDRES 0.353213 Hz  
AQ 1.4156276 sec  
RG 327.68  
DW 21.500 usec  
DE 4.50 usec  
TE 300.0 K  
D1 0.05000000 sec  
d11 0.03000000 sec  
d12 0.00002000 sec

===== CHANNEL f1 =====  
NUC1 13C  
P1 12.30 usec  
PL1 2.00 dB  
SFO1 100.6232913 MHz

===== CHANNEL f2 =====  
CPDPRG2 waltz16  
NUC2 1H  
PCPD2 180.00 usec  
PL2 0.00 dB  
PL12 18.00 dB  
PL13 18.00 dB  
SFO2 400.1316005 MHz

F2 - Processing parameters  
SI 32768  
SF 100.6127290 MHz  
WDW EM  
SSB 0  
LB 1.00 Hz  
GB 0  
PC 1.40

1D NMR plot parameters  
CX 20.00 cm  
CY 0.00 cm  
F1P 20122.55 Hz  
F1 20122.55 Hz  
F2P -0.500 ppm  
F2 -50.31 Hz  
PPMCH 10.02500 ppm/cm  
HZCM 1008.64264 Hz/cm

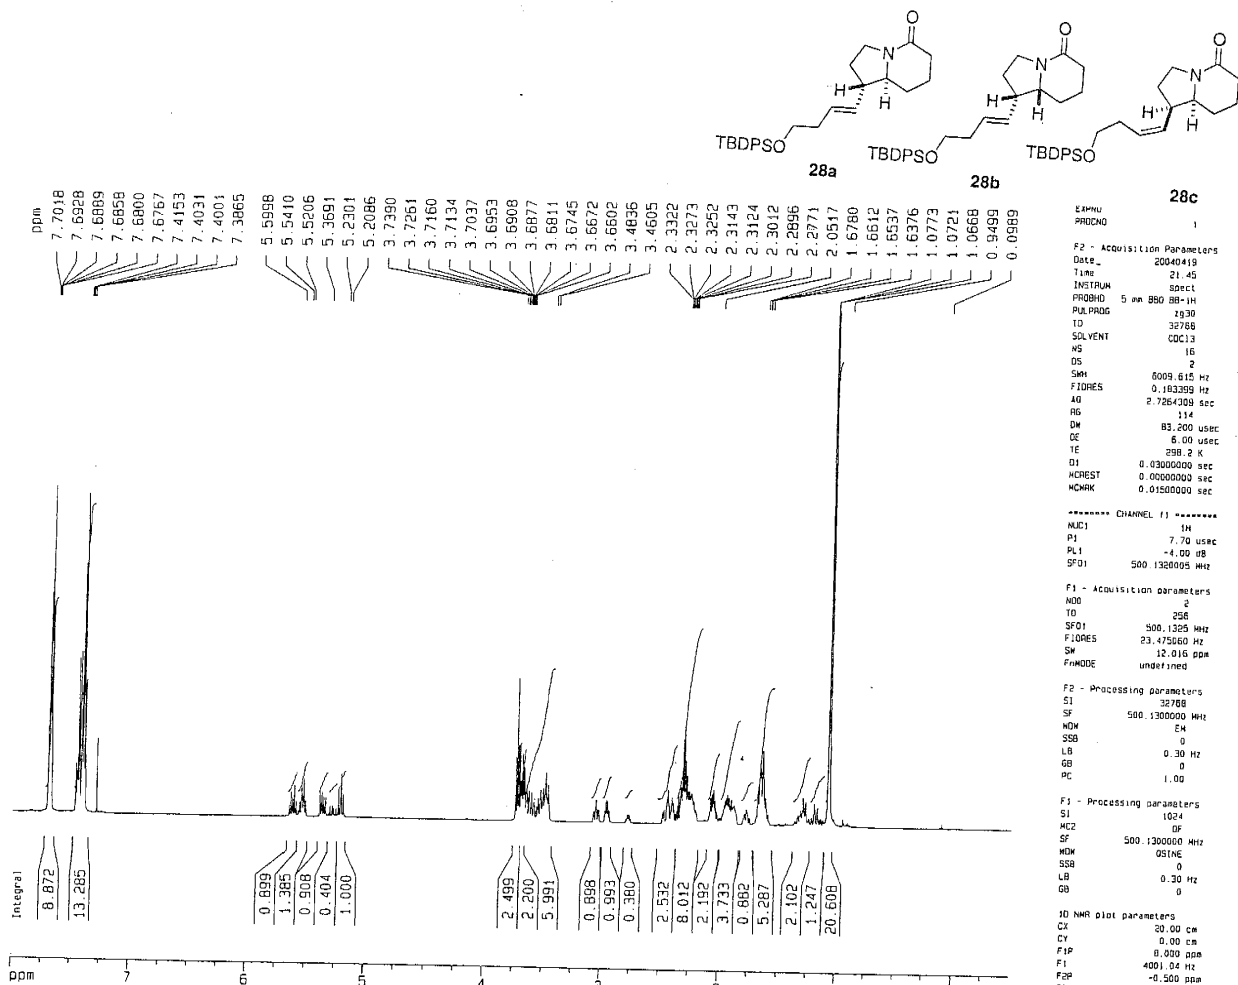

===== CHANNEL f1 =====  
 NUC1 1H  
 P1 7.70 usec  
 PL1 -4.00 dB  
 SFO1 500.132000 MHz  
 F2 - Acquisition Parameters  
 Date\_ 20040419  
 Time 21.45  
 INSTRUM spect  
 PROBHD 5 mm BBO BB-H  
 PULPROG zgpg30  
 TO 2930  
 SOLVENT CDCl3  
 NS 16  
 DS 2  
 SMH 6009.615 Hz  
 FIDRES 0.163399 Hz  
 AQ 2.7264309 sec  
 RG 111  
 DW 83.200 usec  
 DE 6.00 usec  
 TE 298.2 K  
 SI 0.03000000 sec  
 HOREST 0.00000000 sec  
 MCNMR 0.01500000 sec  
 F2 - Processing parameters  
 SI 32768  
 SF 500.130000 MHz  
 MDW 0  
 SSB 0  
 LB 0.30 Hz  
 GB 0  
 PC 1.00  
 F1 - Processing parameters  
 SI 1024  
 SF 500.130000 MHz  
 MDW 0  
 SSB 0  
 LB 0.30 Hz  
 GB 0  
 1D NMR plot parameters  
 CX 20.00 cm  
 CY 0.00 cm  
 F1P 8.000 ppm  
 F1 4001.04 Hz  
 F2P -0.500 ppm  
 F2 -250.00 Hz  
 FPMCH 0.42500 ppm/cm  
 HZCH 212.5525 Hz/cm

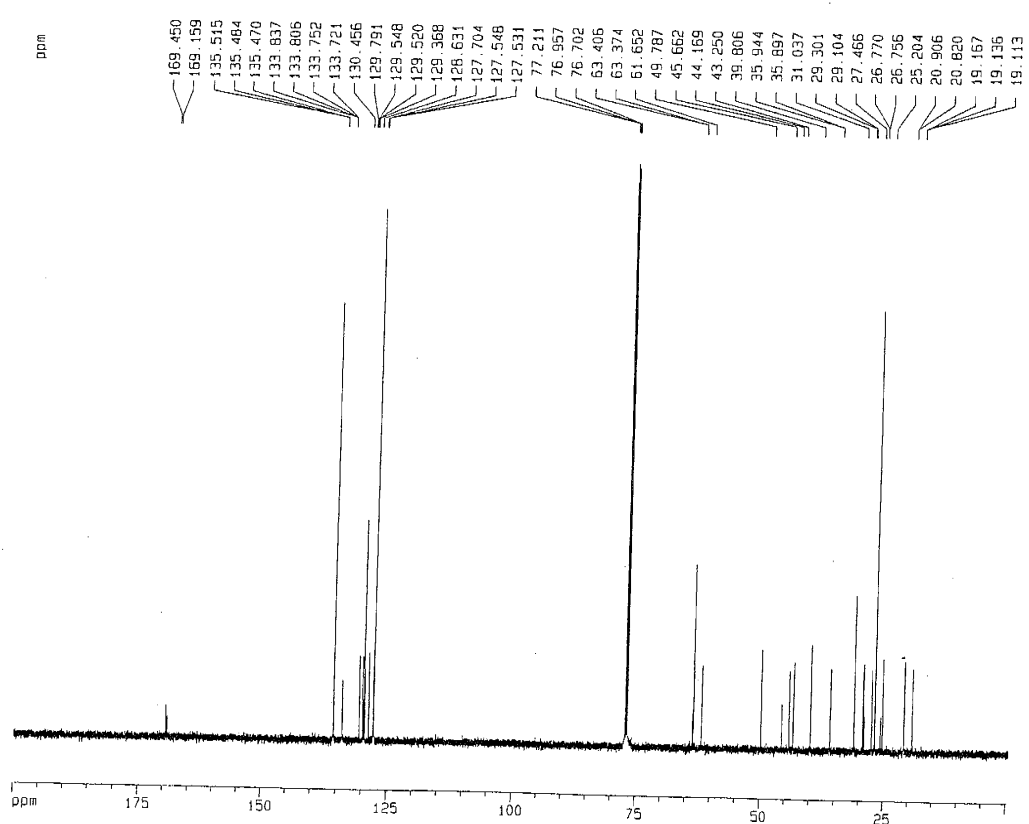

Current Data Parameters  
 NAME 28a-210  
 EXPNO 2  
 PROCNO 1  
 F2 - Acquisition Parameters  
 Date\_ 20040419  
 Time 21.50  
 INSTRUM spect  
 PROBHD 5 mm BBO BB-H  
 PULPROG zgpg30  
 TO 2930  
 SOLVENT CDCl3  
 NS 16  
 DS 4  
 SMH 31446.541 Hz  
 FIDRES 0.479038 Hz  
 AQ 1.0400883 sec  
 RG 2048  
 DW 15.908 usec  
 DE 6.00 usec  
 TE 298.2 K  
 SI 0.15000000 sec  
 H1 0.03000000 sec  
 DELTA 0.05000000 sec  
 HOREST 0.00000000 sec  
 MCNMR 0.01500000 sec  
 F2 - Processing parameters  
 SI 65536  
 SF 125.759000 MHz  
 MDW 0  
 SSB 0  
 LB 1.00 Hz  
 GB 0  
 PC 1.40  
 F1 - Acquisition parameters  
 NUC1 13C  
 P1 6.50 usec  
 PL1 5.00 dB  
 SFO1 125.7697350 MHz  
 F2 - Acquisition Parameters  
 Date\_ 20040419  
 Time 21.50  
 INSTRUM spect  
 PROBHD 5 mm BBO BB-H  
 PULPROG zgpg30  
 TO 2930  
 SOLVENT CDCl3  
 NS 16  
 DS 4  
 SMH 31446.541 Hz  
 FIDRES 0.479038 Hz  
 AQ 1.0400883 sec  
 RG 2048  
 DW 15.908 usec  
 DE 6.00 usec  
 TE 298.2 K  
 SI 0.15000000 sec  
 H1 0.03000000 sec  
 DELTA 0.05000000 sec  
 HOREST 0.00000000 sec  
 MCNMR 0.01500000 sec  
 F2 - Processing parameters  
 SI 65536  
 SF 125.759000 MHz  
 MDW 0  
 SSB 0  
 LB 1.00 Hz  
 GB 0  
 PC 1.40  
 F1 - Acquisition parameters  
 NUC1 13C  
 P1 6.50 usec  
 PL1 5.00 dB  
 SFO1 125.7697350 MHz  
 1D NMR plot parameters  
 CX 20.00 cm  
 CY 0.00 cm  
 F1P 200.000 ppm  
 F1 25151.36 Hz  
 F2P -0.500 ppm  
 F2 -62.08 Hz  
 FPMCH 10.02500 ppm/cm  
 HZCH 1250.1225 Hz/cm

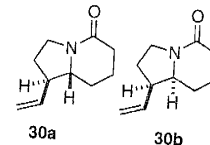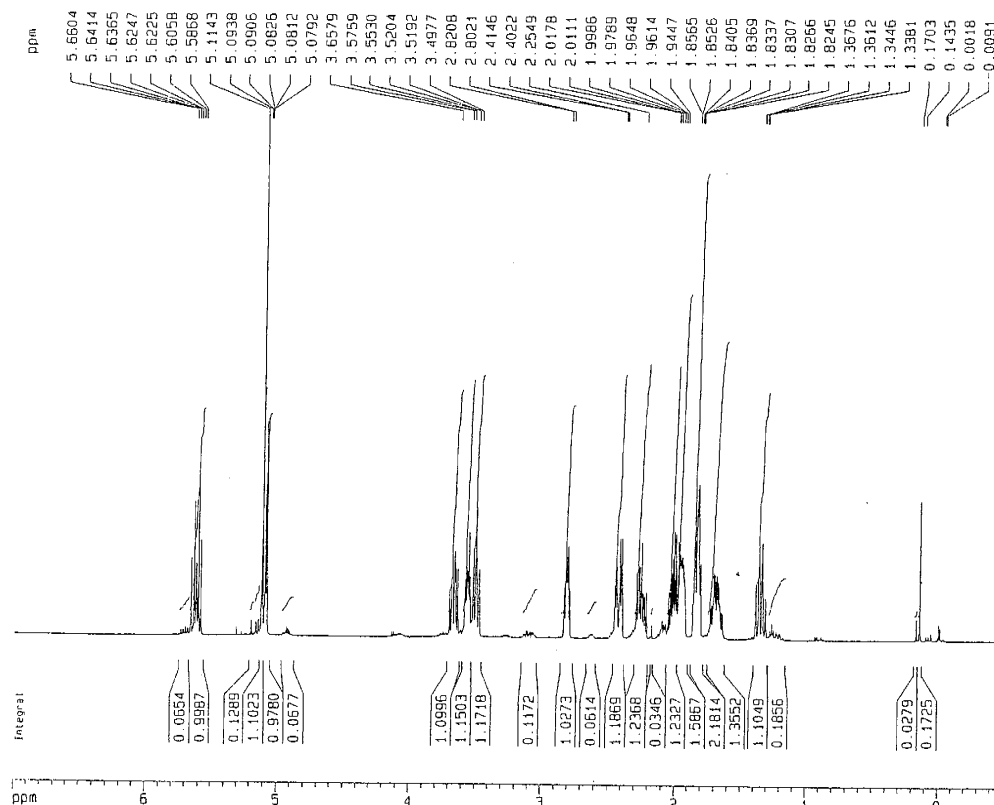

Current Data Parameters  
NAME wj3-242  
EXPNO 1  
PROCNO 1

F2 - Acquisition Parameters  
Date\_ 20030305  
Time 18.14  
INSTAN spect  
PROBHD 5 mm BBO BB-1H  
PULPROG zg30  
TD 32768  
SOLVENT CDCl3  
NS 16  
DS 2  
SWH 5009.615 Hz  
FIDRES 0.183398 Hz  
AQ 2.7264309 sec  
RG 161.3  
DM 83.200 usec  
DE 6.00 usec  
TE 300.0 K  
D1 0.03000000 sec

\*\*\*\*\* CHANNEL f1 \*\*\*\*\*  
NUC1 1H  
P1 7.70 usec  
PL1 -4.00 dB  
SF01 500.1320005 MHz

F2 - Processing parameters  
SI 32768  
SF 500.1300000 MHz  
WDW EM  
SSB 0  
LB 0.30 Hz  
GB 0  
PC 1.00

F1 - Processing parameters  
SI 1024  
MC2 OF  
SF 500.1300000 MHz  
WDW no  
SSB 0  
LB 0.30 Hz  
GB 0

1D NMR plot parameters  
CX 20.00 cm  
CY 0.00 cm  
F1P 7.000 ppm  
F1 3500.91 Hz  
F2P -0.500 ppm  
F2 -250.07 Hz  
PPMCH 0.37500 ppm/cm  
HZCH 187.54875 Hz/cm

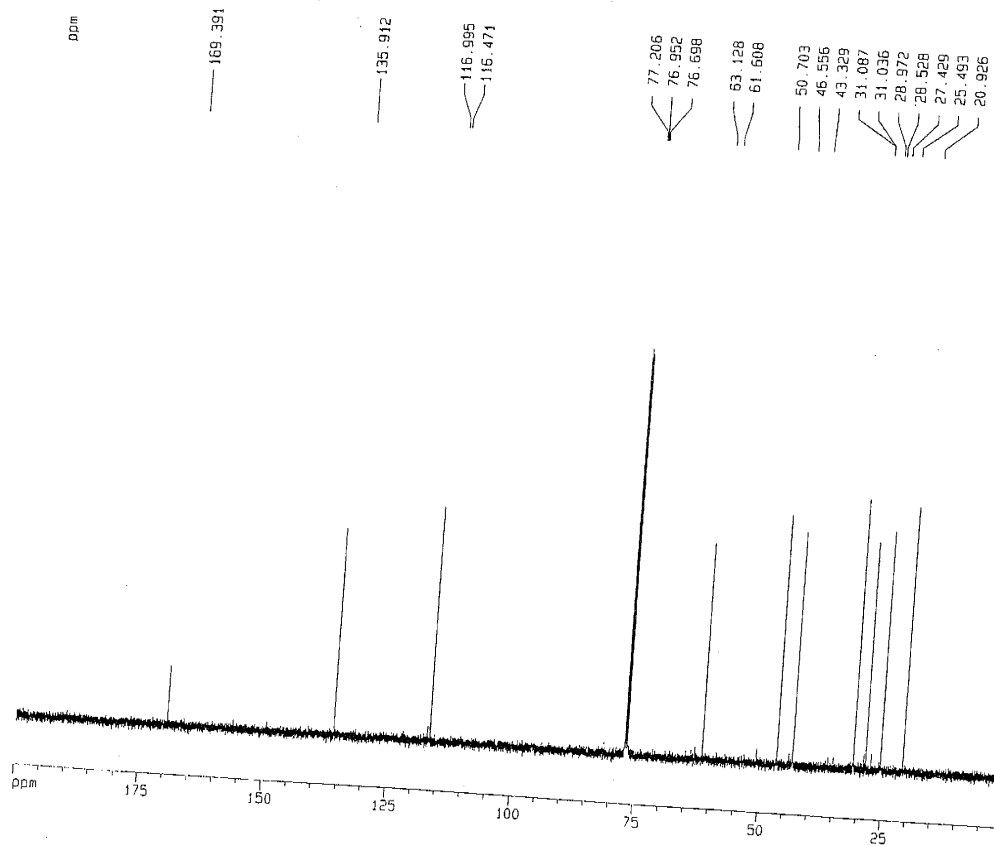

Current Data Parameters  
NAME wj3-242  
EXPNO 2  
PROCNO 1

F2 - Acquisition Parameters  
Date\_ 20030305  
Time 18.20  
INSTAN spect  
PROBHD 5 mm BBO BB-1H  
PULPROG zgpg30  
TD 65536  
SOLVENT CDCl3  
NS 288  
DS 4  
SWH 31446.541 Hz  
FIDRES 0.479836 Hz  
AQ 1.0420883 sec  
RG 2048  
DM 15.900 usec  
DE 6.00 usec  
TE 300.0 K  
D1 0.10000000 sec  
d11 0.03000000 sec  
d12 0.00020000 sec

\*\*\*\*\* CHANNEL f1 \*\*\*\*\*  
NUC1 13C  
P1 6.50 usec  
PL1 5.00 dB  
SF01 125.7719472 MHz

\*\*\*\*\* CHANNEL f2 \*\*\*\*\*  
CPDPRG2 waltz16  
NUC2 1H  
PCPD2 95.00 usec  
PL2 -4.00 dB  
PL12 19.00 dB  
PL13 30.00 dB  
SF02 500.1325000 MHz

F2 - Processing parameters  
SI 65536  
SF 125.7578008 MHz  
WDW EM  
SSB 0  
LB 1.00 Hz  
GB 0  
PC 1.40

F1 - Processing parameters  
SI 1024  
MC2 OF  
SF 500.1300000 MHz  
WDW no  
SSB 0  
LB 0.30 Hz  
GB 0

1D NMR plot parameters  
CX 20.00 cm  
CY 0.00 cm  
F1P 200.000 ppm  
F1 25151.56 Hz  
F2 -0.500 ppm  
F2 -62.88 Hz  
PPMCH 10.02500 ppm/cm  
HZCH 1260.72192 Hz/cm

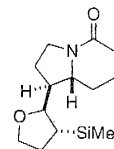

Current i  
NAME  
EXPNO  
PROCNO

37

F2 - Acquisition Parameters  
Date\_ 20051015  
Time 14.48  
INSTRUM spect  
PROBHD 5 mm QNP 1H/15  
PULPROG zg30  
TD 32768  
SOLVENT CDCl3  
NS 16  
DS 2  
SWH 4769.272 Hz  
FIDRES 0.146157 Hz  
AQ 3.4210291 sec  
RG 203.2  
DW 104.400 usec  
DE 6.00 usec  
TE 295.9 K  
D1 1.00000000 sec  
MCREST 0.00000000 sec  
MCWRK 0.01500000 sec

\*\*\*\*\* CHANNEL f1 \*\*\*\*\*  
NUC1 1H  
P1 7.05 usec  
PL1 -3.00 dB  
SFO1 400.1320007 MHz

F2 - Processing parameters  
SI 32768  
SF 400.1300000 MHz  
WDW EM  
SSB 0  
LB 0.30 Hz  
GB 0  
PC 1.00

1D NMR plot parameters  
CX 20.00 cm  
CY 0.00 cm  
F1P 8.000 ppm  
F1 3201.04 Hz  
F2P -0.500 ppm  
F2 -200.07 Hz  
PPMCH 0.42500 ppm/cm  
HZCM 170.05525 Hz/cm

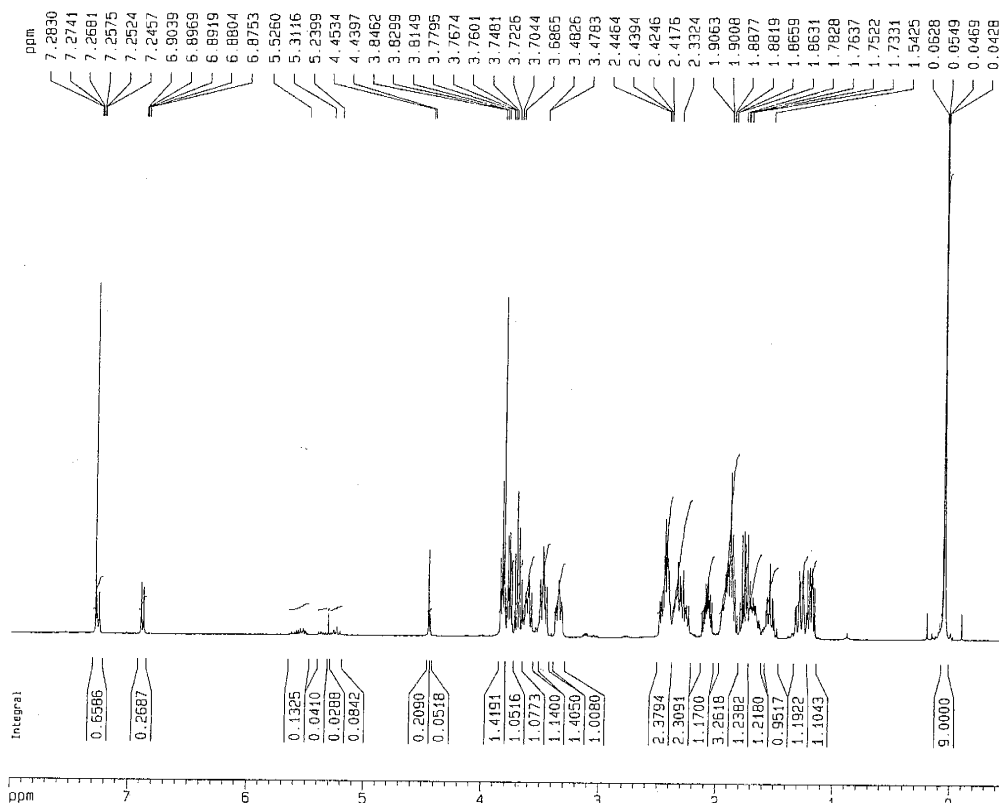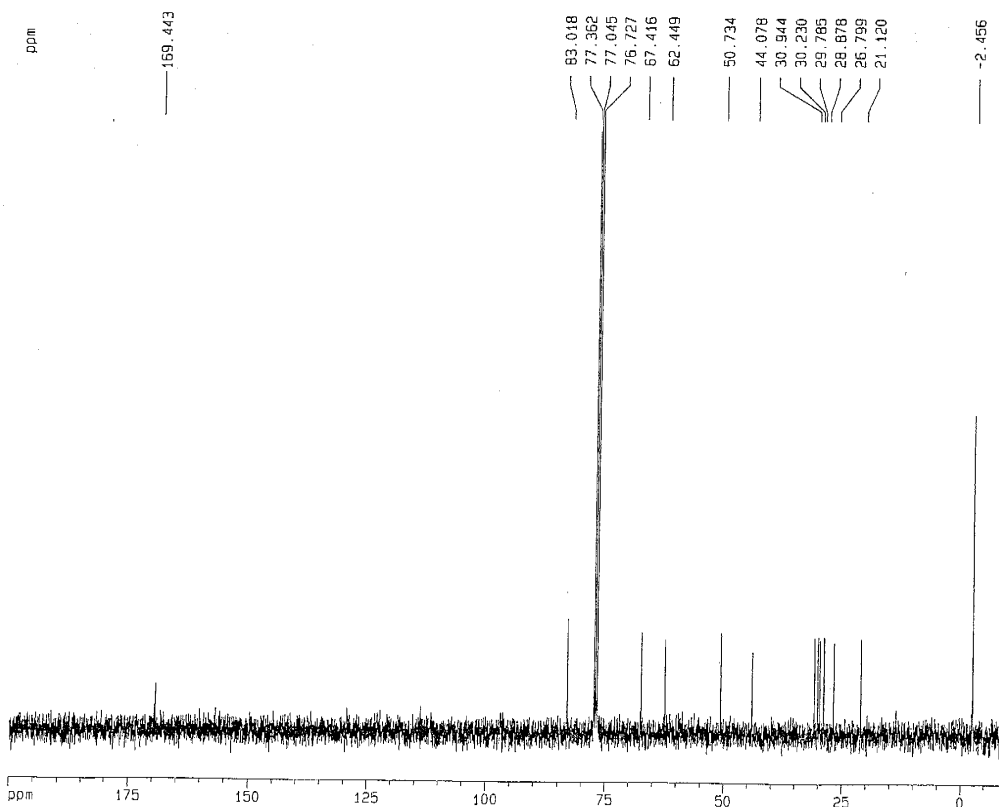

Current Data Parameters  
NAME wj6-22,51-59  
EXPNO 2  
PROCNO 1

F2 - Acquisition Parameters  
Date\_ 20051015  
Time 14.56  
INSTRUM spect  
PROBHD 5 mm QNP 1H/15  
PULPROG zgpg30  
TD 55536  
SOLVENT CDCl3  
NS 632  
DS 4  
SWH 2390.814 Hz  
FIDRES 0.365918 Hz  
AQ 1.3684756 sec  
RG 2048  
DW 20.850 usec  
DE 6.00 usec  
TE 298.1 K  
D1 0.15000001 sec  
D11 0.03000000 sec  
DELTA 0.05000000 sec  
MCREST 0.00000000 sec  
MCWRK 0.01500000 sec

\*\*\*\*\* CHANNEL f1 \*\*\*\*\*  
NUC1 13C  
P1 7.20 usec  
PL1 -2.00 dB  
SFO1 100.6228208 MHz

\*\*\*\*\* CHANNEL f2 \*\*\*\*\*  
CPDPRG2 waltz16  
NUC2 1H  
PCPD2 98.40 usec  
PL2 -3.00 dB  
PL12 19.96 dB  
PL13 120.00 dB  
SFO2 400.1316005 MHz

F2 - Processing parameters  
SI 32768  
SF 100.6127680 MHz  
WDW EM  
SSB 0  
LB 1.00 Hz  
GB 0  
PC 1.40

1D NMR plot parameters  
CX 20.00 cm  
CY 0.00 cm  
F1P 300.000 ppm  
F1 20132.55 Hz  
F2P -10.000 ppm  
F2 -1006.13 Hz  
PPMCH 10.50000 ppm/cm  
HZCM 1056.43408 Hz/cm

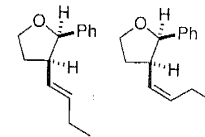

(E)-33a (Z)-33b

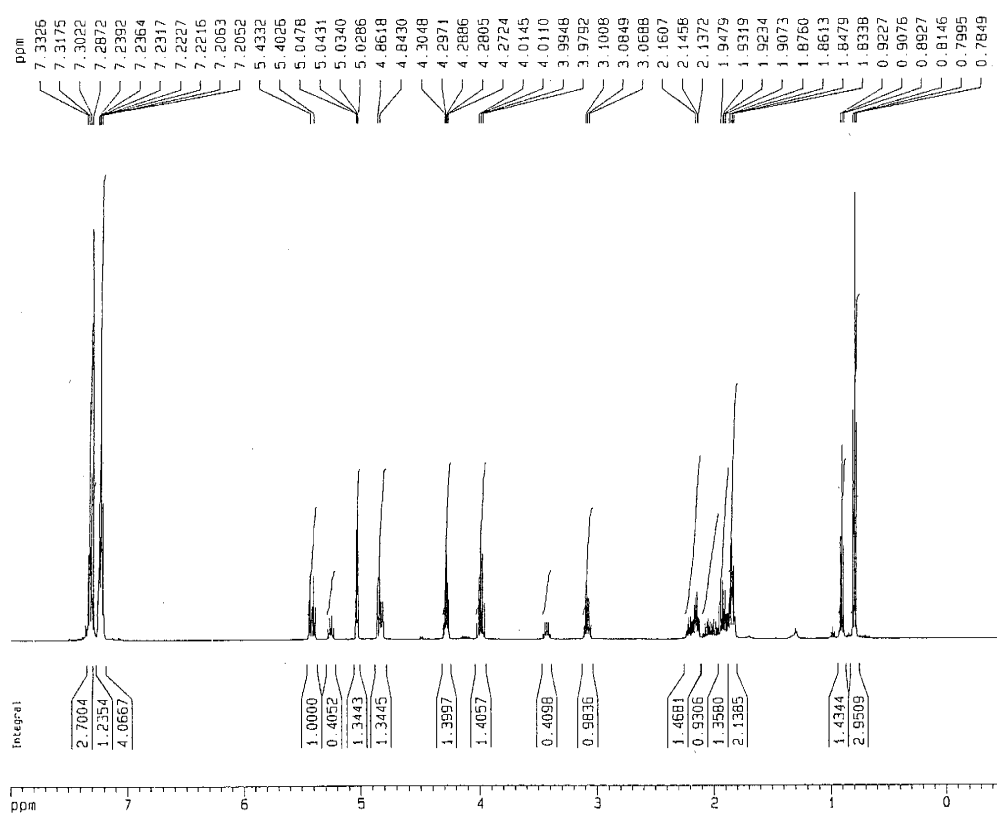

Current Data Parameters  
NAME wj3-274  
EXPNO 1  
PROCNO 1

F2 - Acquisition Parameters  
Date\_ 20030422  
Time 23.39  
INSTRUM spect  
PROBHD 5 mm BBO B6-1H  
PULPROG zg30  
TD 32768  
SOLVENT CDCl3  
NS 16  
DS 2  
SWH 6009.615 Hz  
FIDRES 0.183398 Hz  
AQ 2.7264309 sec  
RG 90.5  
DM 83.200 usec  
DE 6.00 usec  
TE 300.0 K  
D1 0.03000000 sec

\*\*\*\*\* CHANNEL f1 \*\*\*\*\*  
NUC1 1H  
P1 7.70 usec  
PL1 -4.00 dB  
SFO1 500.1320005 MHz

F2 - Processing parameters  
SI 32768  
SF 500.1300000 MHz  
WDW EM  
SSB 0  
LB 0.30 Hz  
GB 0  
PC 1.00

F1 - Processing parameters  
SI 1024  
HC2 DF  
SF 500.1300000 MHz  
WDW QSINE  
SSB 0  
LB 0.30 Hz  
GB 0

1D NMR plot parameters  
CX 20.00 cm  
CY 0.00 cm  
F1P 8.000 ppm  
F1 4001.04 Hz  
F2P -0.500 ppm  
F2 -250.07 Hz  
PPMCH 0.42500 ppm/cm  
HZCM 212.55525 Hz/cm

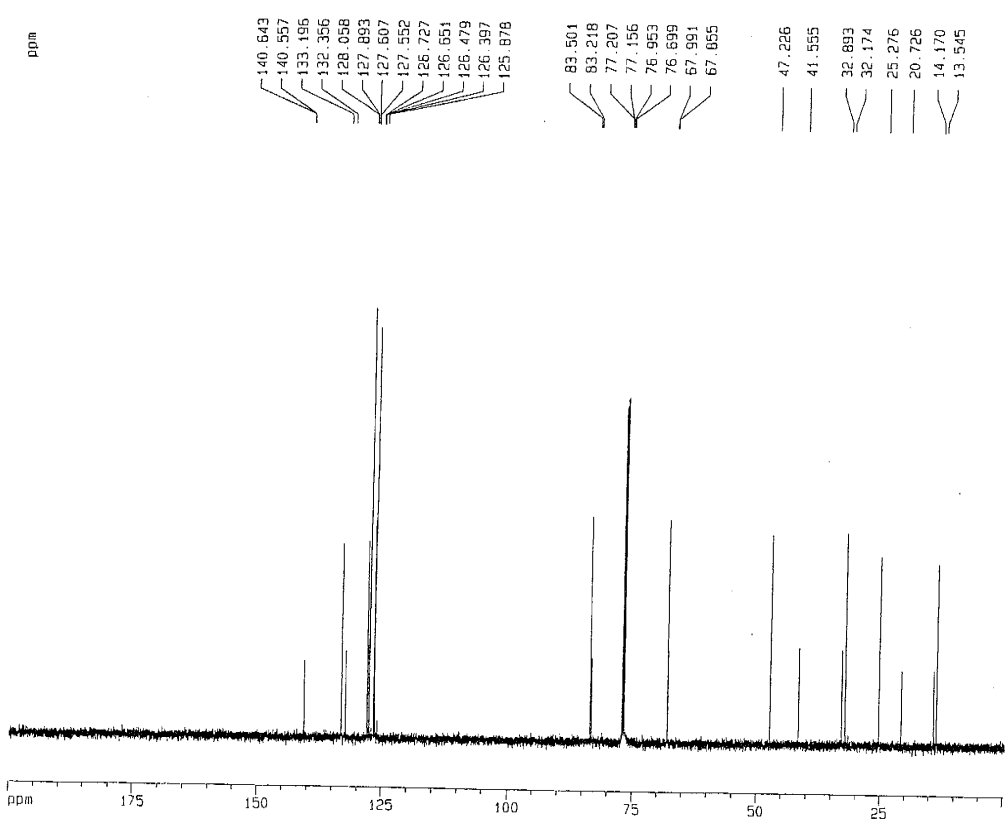

Current Data Parameters  
NAME wj3-274  
EXPNO 2  
PROCNO 1

F2 - Acquisition Parameters  
Date\_ 20030422  
Time 23.44  
INSTRUM spect  
PROBHD 5 mm BBO B6-1H  
PULPROG zg30  
TD 65536  
SOLVENT CDCl3  
NS 255  
DS 4  
SWH 31446.541 Hz  
FIDRES 0.478036 Hz  
AQ 1.0420882 sec  
RG 2040  
DM 15.300 usec  
DE 6.00 usec  
TE 300.0 K  
D1 0.10000000 sec  
d11 0.03000000 sec  
d12 0.00002000 sec

\*\*\*\*\* CHANNEL f1 \*\*\*\*\*  
NUC1 13C  
P1 6.50 usec  
PL1 5.00 dB  
SFO1 125.7719472 MHz

\*\*\*\*\* CHANNEL f2 \*\*\*\*\*  
CPDPRG2 waltz16  
NUC2 1H  
PCPD2 95.00 usec  
PL2 -4.00 dB  
PL12 19.00 dB  
PL13 30.00 dB  
SFO2 500.1325000 MHz

F2 - Processing parameters  
SI 65536  
SF 125.7578008 MHz  
WDW EM  
SSB 0  
LB 1.00 Hz  
GB 0  
PC 1.40

F1 - Processing parameters  
SI 1024  
HC2 DF  
SF 500.1300000 MHz  
WDW NO  
SSB 0  
LB 0.30 Hz  
GB 0

1D NMR plot parameters  
CX 20.00 cm  
CY 0.00 cm  
F1P 200.000 ppm  
F1 25151.56 Hz  
F2P -0.500 ppm  
F2 -62.88 Hz  
PPMCH 10.02500 ppm/cm  
HZCM 1260.72192 Hz/cm

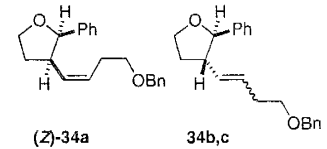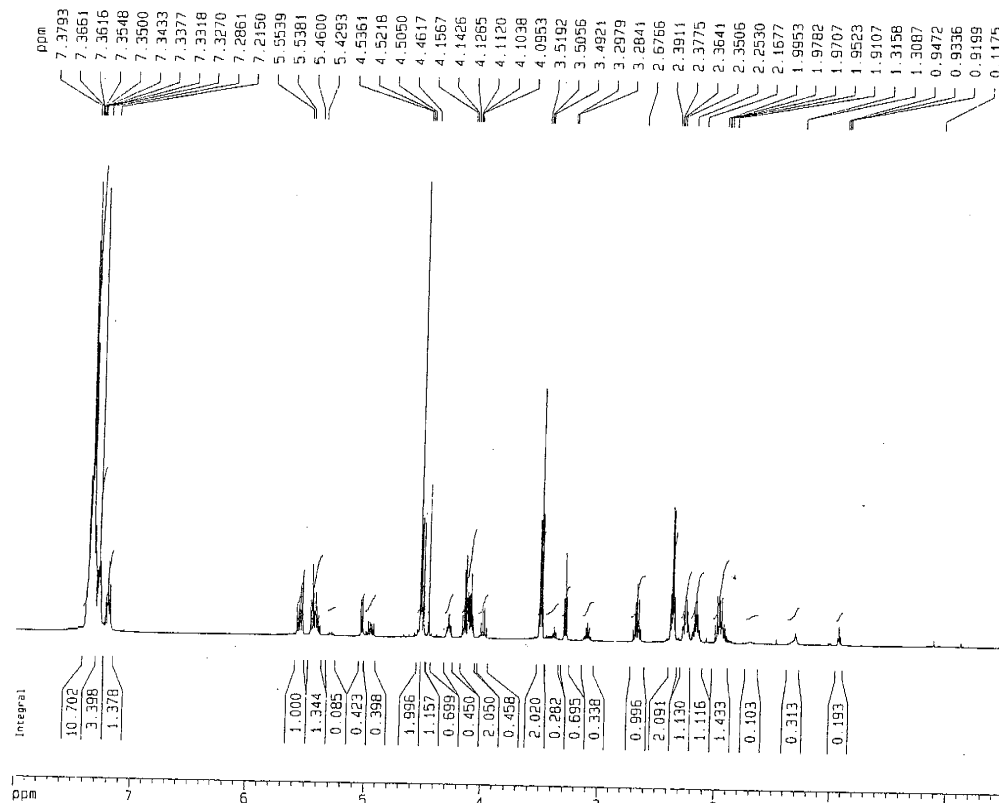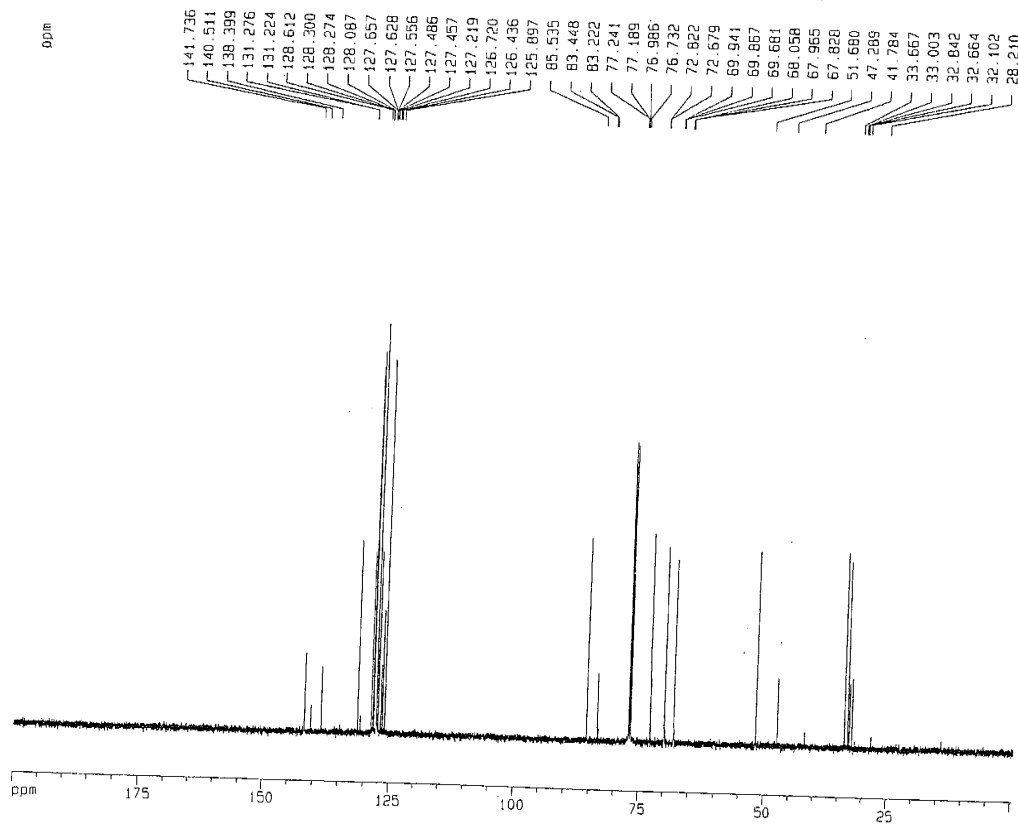

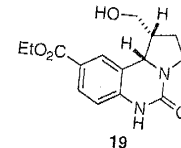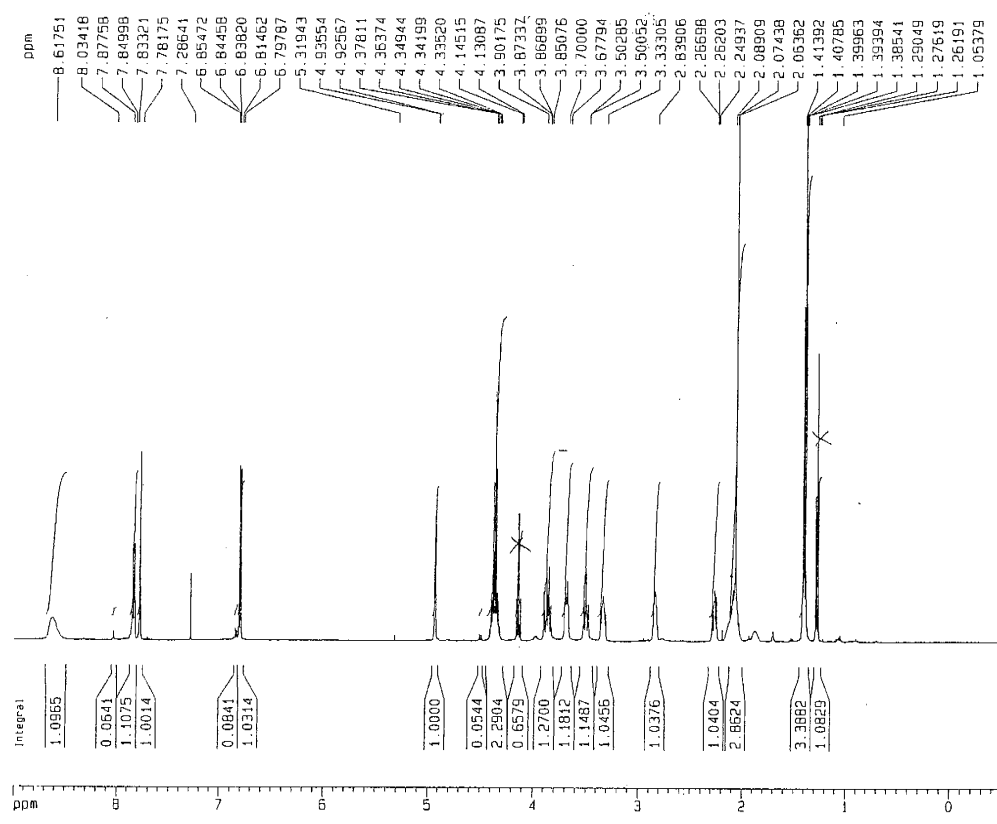

Current Data Parameters  
NAME wj3-196  
EXPNO 1  
PROCNO 1

F2 - Acquisition Parameters  
Date\_ 20030115  
Time 13.13  
INSTRUM spect  
PROBHD 5 mm BBO BB-1H  
PULPROG zg30  
TD 32768  
SOLVENT CDCl3  
NS 16  
DS 2  
SWH 6009.615 Hz  
FIDRES 0.183399 Hz  
AQ 2.284399 sec  
RG 328.1  
DW 83.200 usec  
DE 6.00 usec  
TE 300.0 K  
O1 0.03000000 sec

\*\*\*\*\* CHANNEL f1 \*\*\*\*\*  
NUC1 1H  
P1 7.70 usec  
PL1 -4.00 dB  
SFO1 500.1320005 MHz

F2 - Processing parameters  
SI 32768  
SF 500.1300000 MHz  
WDW EM  
SSB 0  
LB 0.30 Hz  
GB 0  
PC 1.00

F1 - Processing parameters  
SI 1024  
MC2 OF  
SF 500.1300000 MHz  
WDW QSI  
SSB 0  
LB 0.30 Hz  
GB 0

1D NMR plot parameters  
CX 20.00 cm  
CY 0.00 cm  
F1P 9.000 ppm  
F1 4501.17 Hz  
F2P -0.500 ppm  
F2 -250.07 Hz  
PPMCM 0.47500 ppm/cm  
HZCM 237.56175 Hz/cm

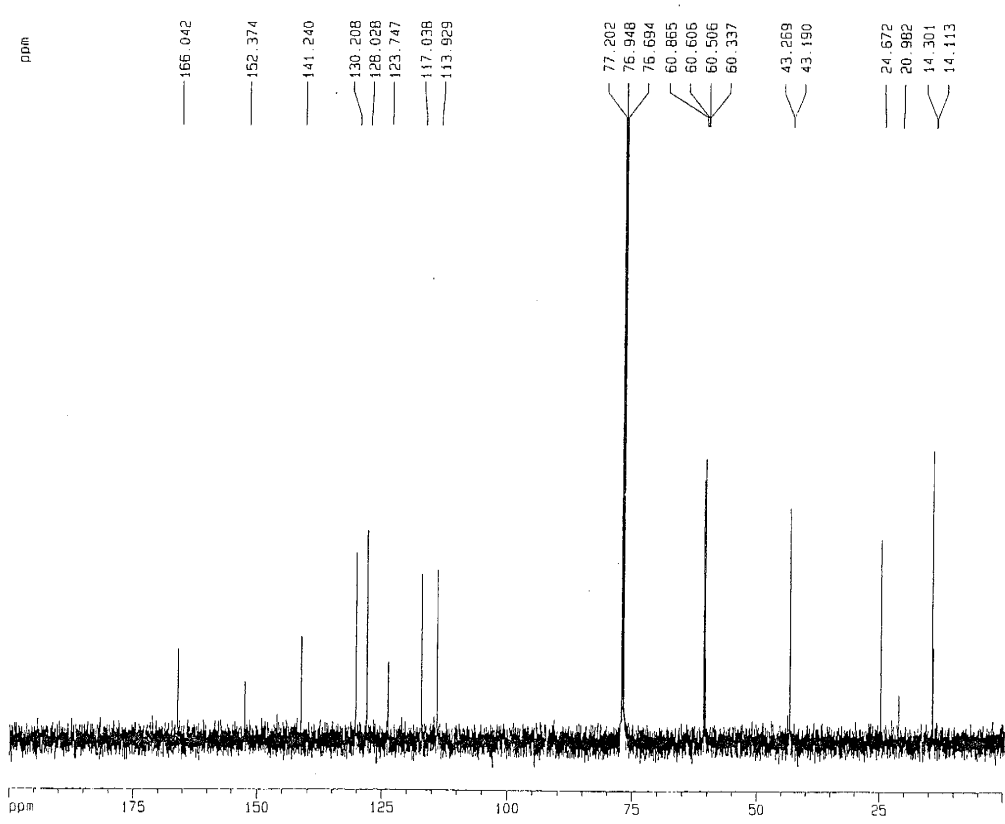

Current Data Parameters  
NAME wj3-196  
EXPNO 2  
PROCNO 1

F2 - Acquisition Parameters  
Date\_ 20030115  
Time 13.18  
INSTRUM spect  
PROBHD 5 mm BBO BB-1H  
PULPROG zgpg30  
TD 65536  
SOLVENT CDCl3  
NS 362  
DS 4  
SWH 31446.541 Hz  
FIDRES 0.470885 Hz  
AQ 1.045083 sec  
RG 0192  
DW 15.900 usec  
DE 8.00 usec  
TE 300.0 K  
O1 0.10000000 sec  
O11 0.03000000 sec  
O12 0.00002000 sec

\*\*\*\*\* CHANNEL f1 \*\*\*\*\*  
NUC1 13C  
P1 6.50 usec  
PL1 5.00 dB  
SFO1 125.7719472 MHz

\*\*\*\*\* CHANNEL f2 \*\*\*\*\*  
CPDPRG2 waltz16  
NUC2 1H  
PCPD2 95.00 usec  
PL2 -4.00 dB  
PL12 19.00 dB  
PL13 30.00 dB  
SFO2 500.1325000 MHz

F2 - Processing parameters  
SI 65536  
SF 125.7578308 MHz  
WDW EM  
SSB 0  
LB 1.00 Hz  
GB 0  
PC 1.40

F1 - Processing parameters  
SI 1024  
MC2 OF  
SF 500.1300000 MHz  
WDW nc  
SSB 0  
LB 0.30 Hz  
GB 0

1D NMR plot parameters  
CX 20.00 cm  
CY 0.00 cm  
F1P 200.000 ppm  
F1 25151.56 Hz  
F2P -62.00 Hz  
F2 -250.07 Hz  
PPMCM 10.02500 ppm/cm  
HZCM 1260.72152 Hz/cm

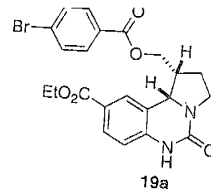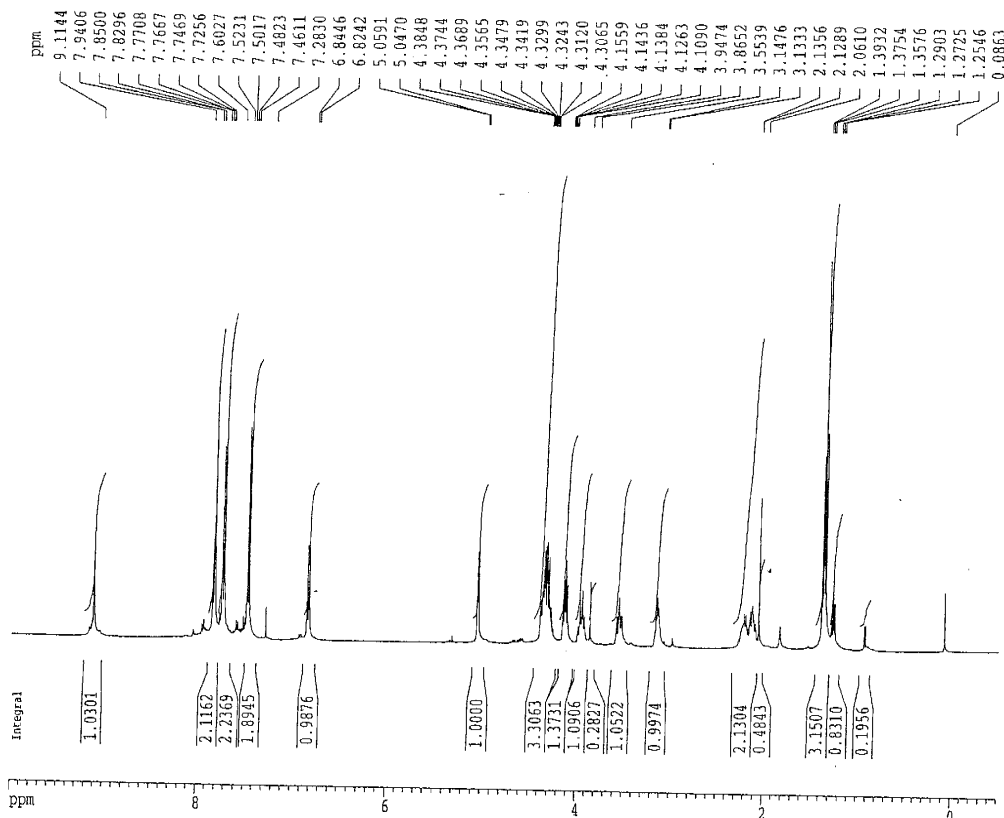

NAME wj3-225  
EXPNO 1  
PROCNO 1

F2 - Acquisition Parameters  
Date\_ 20030215  
Time 18.23  
INSTRUM drx400  
PROBHD 5 mm Multinucl  
PULPROG zg30  
TD 32768  
SOLVENT CDCl3  
NS 16  
DS 2  
SWH 4789.272 Hz  
FIDRES 0.146157 Hz  
AQ 3.4210291 sec  
RG 114  
DW 104.400 usec  
DE 4.50 usec  
TE 300.0 K  
D1 1.00000000 sec

===== CHANNEL f1 =====  
NUC1 1H  
P1 7.70 usec  
PL1 -6.00 dB  
SFO1 400.1320007 MHz

F2 - Processing parameters  
SI 16384  
SF 400.1300000 MHz  
WDW EM  
SSB 0  
LB 0.30 Hz  
GB 0  
PC 1.00

1D NMR plot parameters  
CX 20.00 cm  
CY 0.00 cm  
F1P 10.000 ppm  
F1 4001.30 Hz  
F2P -0.500 ppm  
F2 -200.07 Hz  
PPMCH 0.52500 ppm/cm  
HZCH 210.06825 Hz/cm

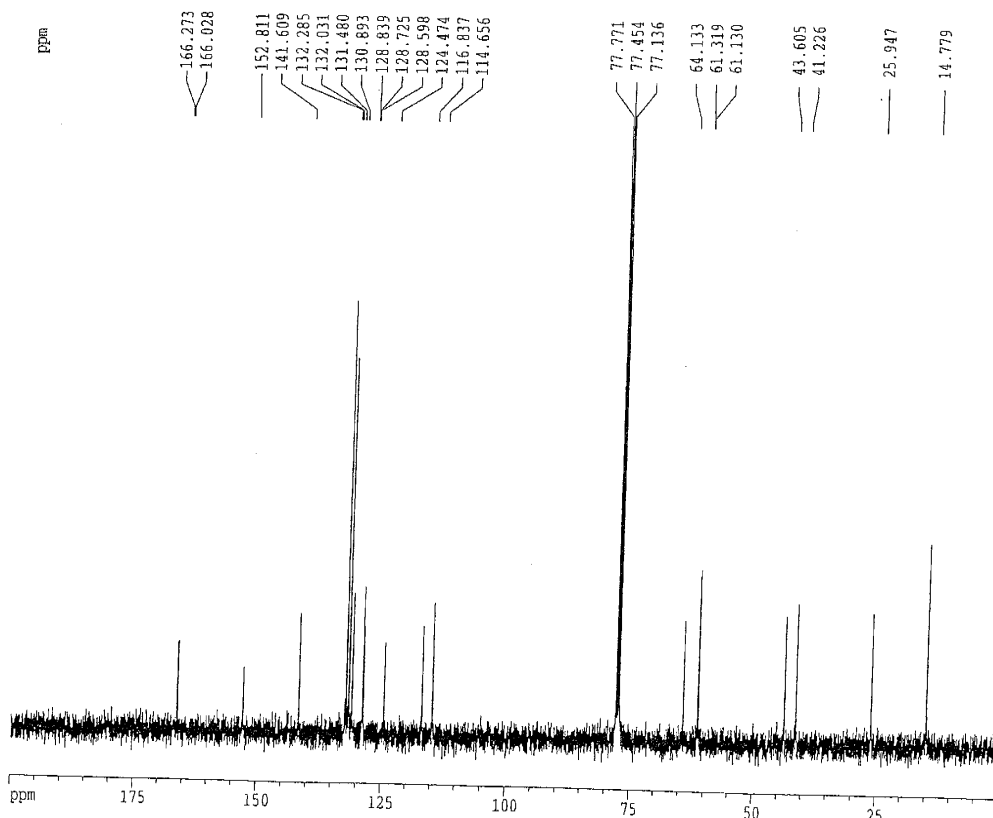

Current Data Parameters  
NAME wj3-225  
EXPNO 2  
PROCNO 1

F2 - Acquisition Parameters  
Date\_ 20030215  
Time 18.27  
INSTRUM drx400  
PROBHD 5 mm Multinucl  
PULPROG zgpg30  
TD 65536  
SOLVENT CDCl3  
NS 435  
DS 2  
SWH 23148.148 Hz  
FIDRES 0.353213 Hz  
AQ 1.4156276 sec  
RG 32768  
DW 21.600 usec  
DE 4.50 usec  
TE 300.0 K  
D1 0.05000000 sec  
d11 0.03000000 sec  
d12 0.00002000 sec

===== CHANNEL f1 =====  
NUC1 13C  
P1 12.30 usec  
PL1 2.00 dB  
SFO1 100.6232933 MHz

===== CHANNEL f2 =====  
CPDPRG2 waltz16  
NUC2 1H  
PCPD2 100.00 usec  
P2 0.00 dB  
PL12 18.00 dB  
PL13 18.00 dB  
SFO2 400.1316005 MHz

F2 - Processing parameters  
SI 32768  
SF 100.6127290 MHz  
WDW EM  
SSB 0  
LB 1.00 Hz  
GB 0  
PC 1.40

1D NMR plot parameters  
CX 20.00 cm  
CY 0.00 cm  
F1P 200.000 ppm  
F1 20122.55 Hz  
F2P -0.500 ppm  
F2 -50.30 Hz  
PPMCH 10.02500 ppm/cm  
HZCH 1008.64258 Hz/cm

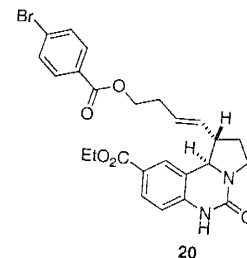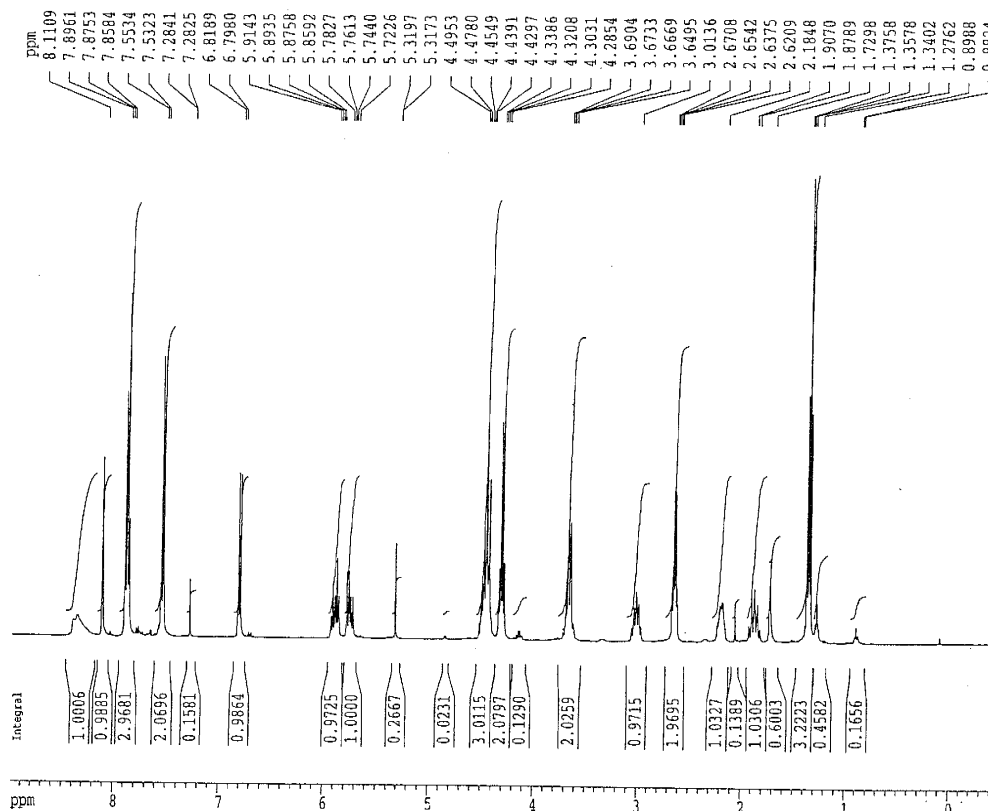

F2 - Acquisition Parameters  
Date\_ 20021127  
Time 17.01  
INSTRUM drx400  
PROBHD 5 mm Multinucl  
PULPROG zg30  
TD 32768  
SOLVENT CDCl3  
NS 16  
DS 2  
SWH 4789.272 Hz  
FIDRES 0.146157 Hz  
AQ 3.4210291 sec  
RG 128  
DW 104.400 usec  
DE 4.50 usec  
TE 300.0 K  
D1 1.00000000 sec

\*\*\*\*\* CHANNEL f1 \*\*\*\*\*  
NUC1 1H  
P1 7.70 usec  
PL1 -6.00 dB  
SFO1 400.1320007 MHz

F2 - Processing parameters  
SI 16384  
SF 400.1300000 MHz  
WDW EM  
SSB 0  
LB 0.30 Hz  
GB 0  
PC 1.00

1D NMR plot parameters  
CX 20.00 cm  
CY 0.00 cm  
F1P 9.000 ppm  
F1 3601.17 Hz  
F2P -0.500 ppm  
F2 -200.07 Hz  
PPHMC 0.47500 ppm/cm  
H2CM 190.06175 Hz/cm

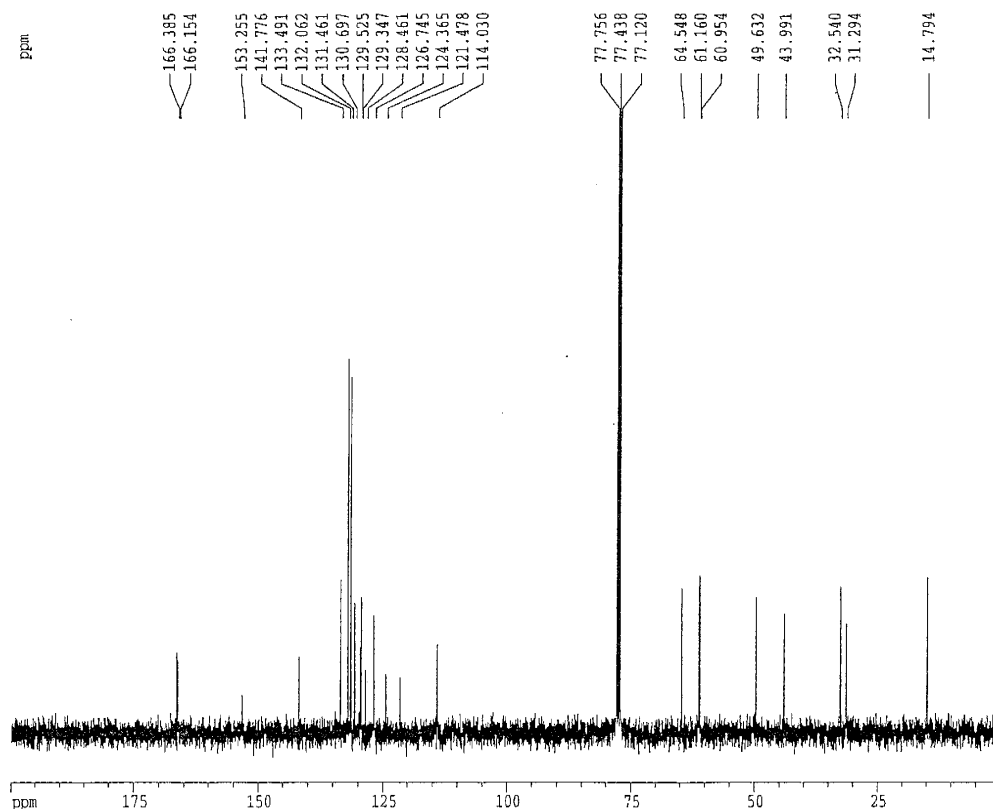

Current Data Parameters  
NMR wj3-165  
EXPNO 2  
PROCNO 1

F2 - Acquisition Parameters  
Date\_ 20021127  
Time 17.07  
INSTRUM drx400  
PROBHD 5 mm Multinucl  
PULPROG zg30  
TD 65536  
SOLVENT CDCl3  
NS 425  
DS 2  
SWH 23148.148 Hz  
FIDRES 0.351213 Hz  
AQ 1.4136276 sec  
RG 3649.1  
DW 21.600 usec  
DE 4.50 usec  
TE 300.0 K  
D1 0.05000000 sec  
d11 0.03000000 sec  
d12 0.00020000 sec

\*\*\*\*\* CHANNEL f1 \*\*\*\*\*  
NUC1 13C  
P1 12.30 usec  
PL1 2.00 dB  
SFO1 100.6232933 MHz

\*\*\*\*\* CHANNEL f2 \*\*\*\*\*  
CPDPRG2 waltz16  
NUC2 1H  
PCPD2 100.00 usec  
PL2 0.00 dB  
PL12 18.00 dB  
PL13 18.00 dB  
SFO2 400.1316005 MHz

F2 - Processing parameters  
SI 32768  
SF 100.6127290 MHz  
WDW EM  
SSB 0  
LB 1.00 Hz  
GB 0  
PC 1.40

1D NMR plot parameters  
CX 20.00 cm  
CY 0.00 cm  
F1P 200.000 ppm  
F1 2032.55 Hz  
F2P -0.500 ppm  
F2 -50.31 Hz  
PPHMC 10.02500 ppm/cm  
H2CM 1008.64270 Hz/cm

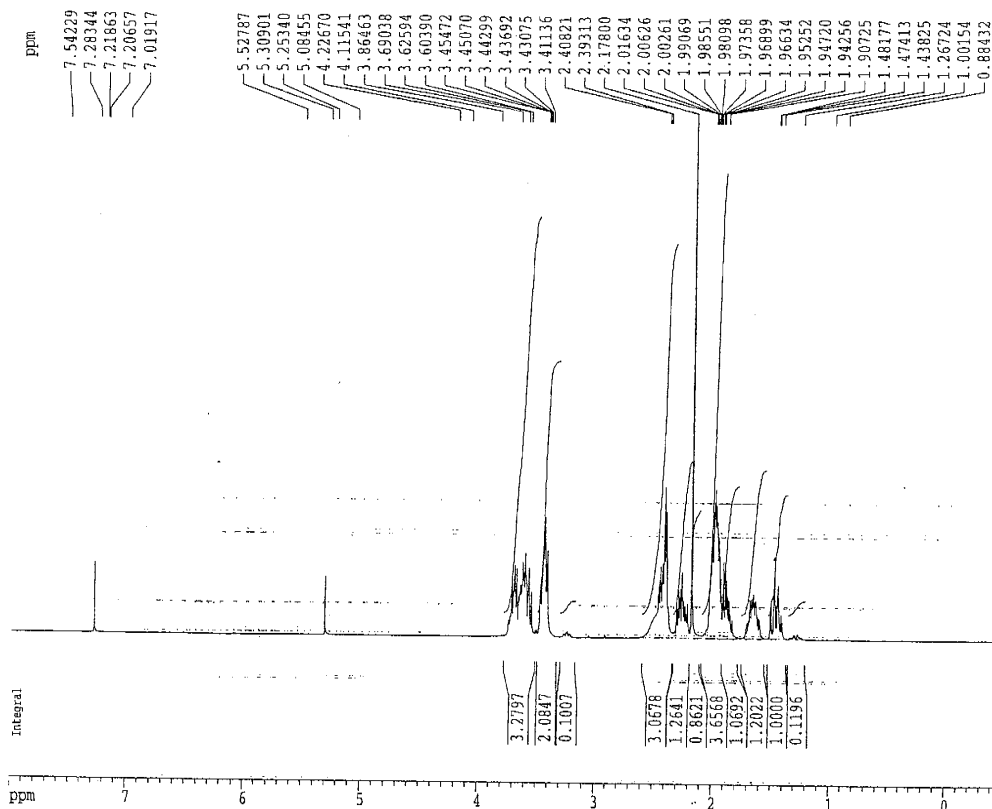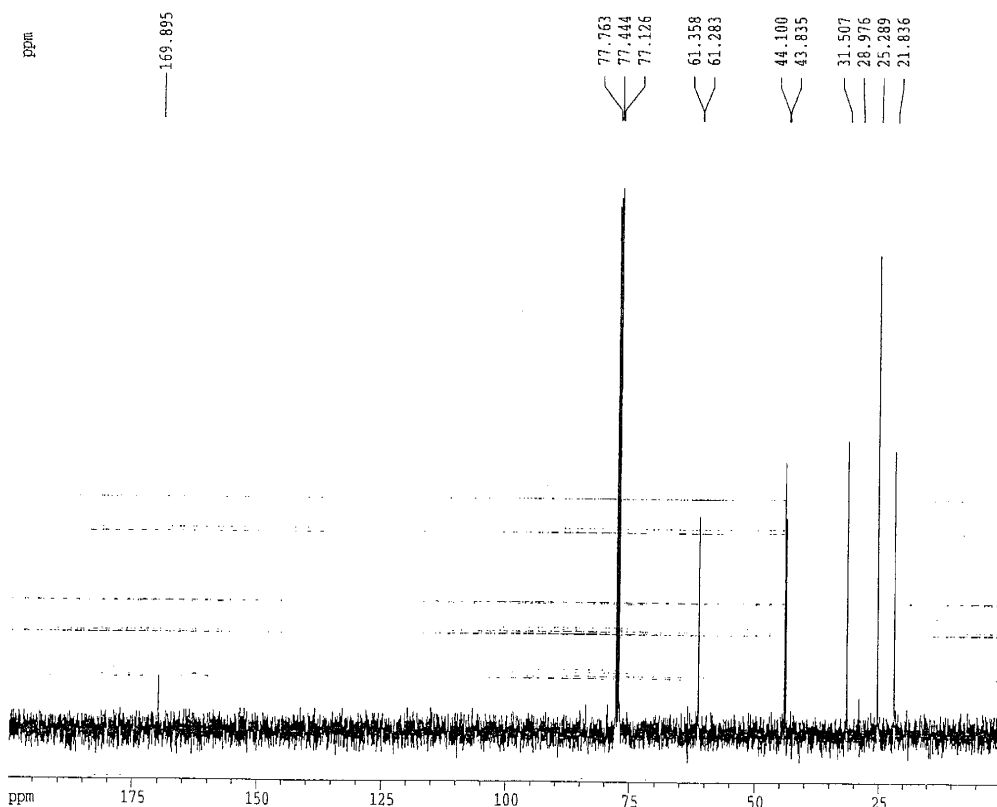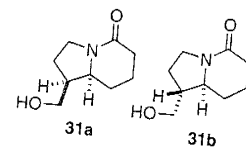

Current Data Parameters  
 NAME wj4-38  
 EXPNO 1  
 PROCNO 1

F2 - Acquisition Parameters  
 Date\_ 20030702  
 Time 16.08  
 INSTRUM drx400  
 PROBHD 5 mm Multinucl  
 PULPROG zg30  
 TO 32768  
 SOLVENT CDCl3  
 NS 16  
 DS 2  
 SWH 4789.272 Hz  
 FIDRES 0.146157 Hz  
 AQ 3.4210291 sec  
 RG 143.7  
 DW 104.400 usec  
 DE 4.50 usec  
 TE 300.0 K  
 D1 1.00000000 sec

===== CHANNEL f1 =====  
 NUC1 1H  
 P1 7.70 usec  
 PL1 -6.00 dB  
 SFO1 400.1320007 MHz

F2 - Processing parameters  
 SI 16384  
 SF 400.1300000 MHz  
 WDW EM  
 SSB 0  
 LB 0.30 Hz  
 GB 0  
 PC 1.00

1D NMR plot parameters  
 CX 20.00 cm  
 CY 0.00 cm  
 F1P 8.000 ppm  
 F1 3201.04 Hz  
 F2P -0.500 ppm  
 F2 -200.07 Hz  
 PPMCM 0.42500 ppm/cm  
 HZCM 170.05525 Hz/cm

Current Data Parameters  
 NAME wj4-38  
 EXPNO 2  
 PROCNO 1

F2 - Acquisition Parameters  
 Date\_ 20030702  
 Time 16.11  
 INSTRUM drx400  
 PROBHD 5 mm Multinucl  
 PULPROG zgpg30  
 TO 85536  
 SOLVENT CDCl3  
 NS 175  
 DS 2  
 SWH 23148.148 Hz  
 FIDRES 0.353213 Hz  
 AQ 1.4156276 sec  
 RG 32768  
 DW 21.600 usec  
 DE 4.50 usec  
 TE 300.0 K  
 D1 0.05000000 sec  
 d11 0.03000000 sec  
 d12 0.00002000 sec

===== CHANNEL f1 =====  
 NUC1 13C  
 P1 12.30 usec  
 PL1 2.00 dB  
 SFO1 100.6212933 MHz

===== CHANNEL f2 =====  
 CPDPRG2 waltz16  
 NUC2 1H  
 PCPD2 100.00 usec  
 PL2 0.00 dB  
 PL12 18.00 dB  
 PL13 18.00 dB  
 SFO2 400.1316005 MHz

F2 - Processing parameters  
 SI 32768  
 SF 100.5127230 MHz  
 WDW EM  
 SSB 0  
 LB 1.00 Hz  
 GB 0  
 PC 1.40

1D NMR plot parameters  
 CX 20.00 cm  
 CY 0.00 cm  
 F1P 200.000 ppm  
 F1 20122.55 Hz  
 F2P -0.500 ppm  
 F2 -50.31 Hz  
 PPMCM 10.02500 ppm/cm  
 HZCM 1008.64264 Hz/cm

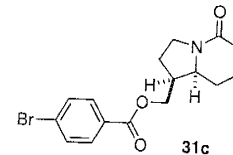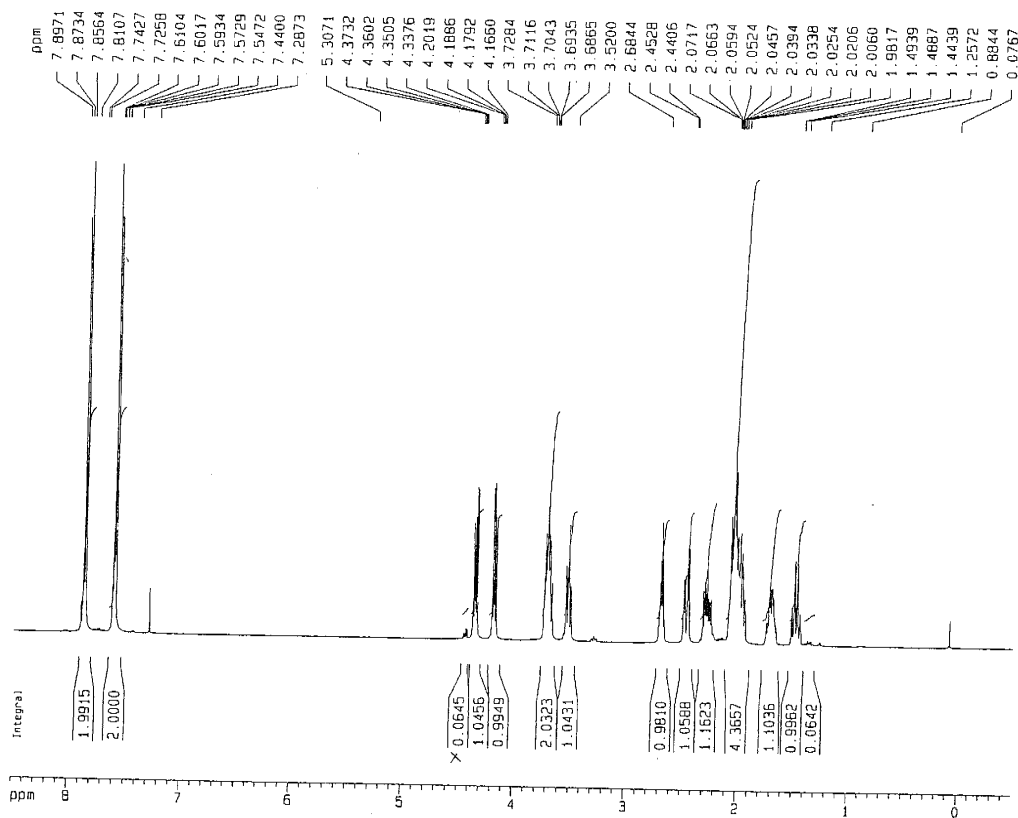

Current Data Parameters  
NAME wj4-40  
EXPNO 1  
PROCNO 1

F2 - Acquisition Parameters  
Date\_ 20030807  
Time 19.57  
INSTRUM spect  
PROBHD 5 mm BBO BB-1H  
PULPROG zg30  
TO 32768  
SOLVENT CDCl3  
NS 16  
DS 2  
SWH 6009.615 Hz  
FIDRES 0.183399 Hz  
AQ 2.7264309 sec  
RG 114  
OW 83.200 usec  
DE 5.00 usec  
TE 300.0 K  
D1 0.03000000 sec

\*\*\*\*\* CHANNEL f1 \*\*\*\*\*  
NUC1 1H  
P1 7.70 usec  
PL1 -4.00 dB  
SFO1 500.1320005 MHz

F2 - Processing parameters  
SI 32768  
SF 500.1300000 MHz  
WDW EM  
SSB 0  
LB 0.30 Hz  
GB 0  
PC 1.00

F1 - Processing parameters  
SI 1024  
WC2 0  
SF 500.1300000 MHz  
WDW QSINE  
SSB 0  
LB 0.30 Hz  
GB 0

1D NMR plot parameters  
CX 20.00 cm  
CY 0.00 cm  
F1P 8.500 ppm  
F2P 4251.10 Hz  
F2 -250.07 Hz  
PPMCH 0.45000 ppm/cm  
HZCM 225.05050 Hz/cm

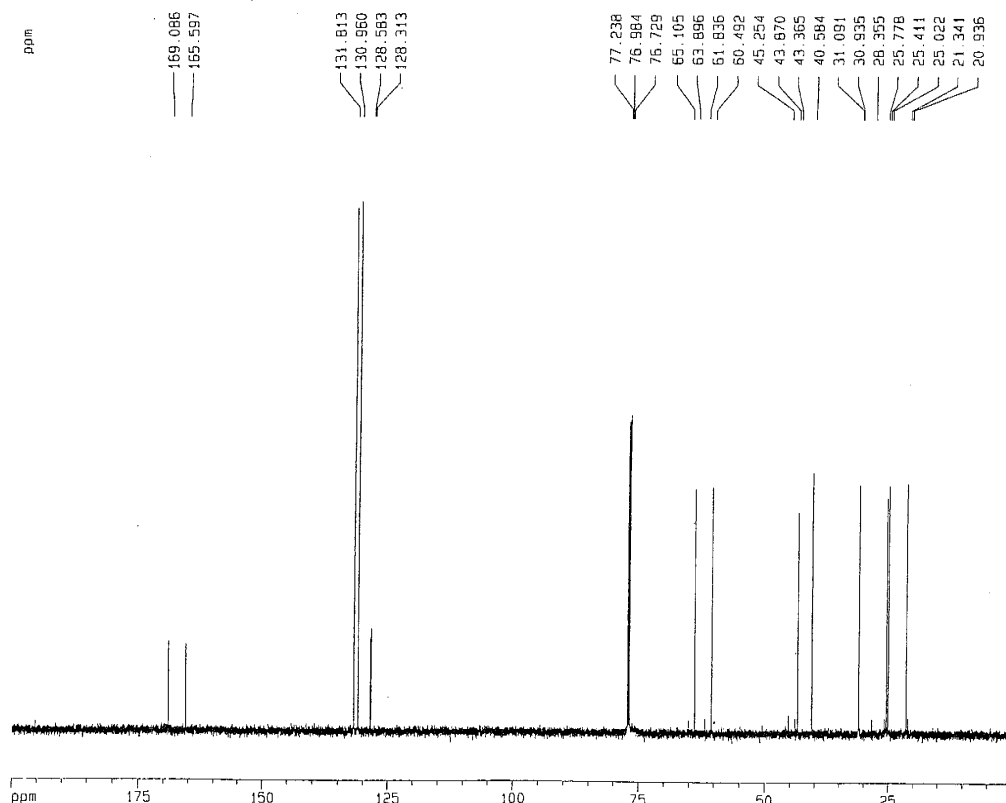

Current Data Parameters  
NAME wj4-40  
EXPNO 2  
PROCNO 1

F2 - Acquisition Parameters  
Date\_ 20030807  
Time 20.01  
INSTRUM spect  
PROBHD 5 mm BBO BB-1H  
PULPROG zgpg30  
TO 65536  
SOLVENT CDCl3  
NS 248  
DS 4  
SWH 31446.541 Hz  
FIDRES 0.479836 Hz  
AQ 1.0420903 sec  
RG 2048  
OW 15.900 usec  
DE 6.00 usec  
TE 300.0 K  
D1 0.10000000 sec  
D11 0.03000000 sec  
D12 0.00002000 sec

\*\*\*\*\* CHANNEL f1 \*\*\*\*\*  
NUC1 13C  
P1 6.50 usec  
PL1 5.00 dB  
SFO1 125.7719472 MHz

\*\*\*\*\* CHANNEL f2 \*\*\*\*\*  
CPDPRG2 waltz16  
NUC2 1H  
PCPD2 95.00 usec  
PL2 -4.00 dB  
PL12 19.00 dB  
PL13 30.00 dB  
SFO2 500.1325000 MHz

F2 - Processing parameters  
SI 65536  
SF 125.7578008 MHz  
WDW EM  
SSB 0  
LB 1.00 Hz  
GB 0  
PC 1.40

F1 - Processing parameters  
SI 1024  
WC2 0  
SF 500.1300005 MHz  
WDW na  
SSB 0  
LB 0.30 Hz  
GB 0

1D NMR plot parameters  
CX 20.00 cm  
CY 0.00 cm  
F1P 200.000 ppm  
F2P 25151.56 Hz  
F2 -0.500 ppm  
F2 -62.00 Hz  
PPMCH 10.02500 ppm/cm  
HZCM 1260.72192 Hz/cm

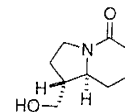

32

Current Data Parameters  
NAME wj3-42.cryst  
EXPNO 1  
PROCNO 1

F2 - Acquisition Parameters  
Date\_ 20020706  
Time 14:18  
INSTRUM spect  
PROBHD 5 mm BBO BB-1H  
PULPROG zg30  
TD 32768  
SOLVENT CDCl3  
NS 16  
DS 2  
SWH 6009.615 Hz  
FIDRES 0.183399 Hz  
AQ 0.7264309 sec  
RG 574.7  
DM 83.200 usec  
DE 6.00 usec  
TE 300.0 K  
D1 0.0300000 sec

\*\*\*\*\* CHANNEL f1 \*\*\*\*\*  
NUC1 1H  
P1 7.70 usec  
PL1 -4.00 dB  
SF01 500.132005 MHz

F1 - Acquisition Parameters  
ND0 2  
TD 256  
SF01 500.1325 MHz  
FIDRES 23.475000 Hz  
SW 12.016 ppm

F2 - Processing parameters  
SI 32768  
SF 500.1300000 MHz  
KHM EN  
SSB 0  
LB 0.30 Hz  
GB 0  
PC 1.00

F1 - Processing parameters  
SI 1324  
MC2 OF  
SF 500.1300000 MHz  
KHM no  
SSB 0  
LB 0.30 Hz  
GB 0

1D NMR plot parameters  
CX 20.00 cm  
CY 0.00 cm  
F1P 0.000 ppm  
F1 4001.04 Hz  
F2P -0.500 ppm  
F2 -250.07 Hz  
PPHCH 0.42500 ppm/cm  
HZCM 212.55295 Hz/cm

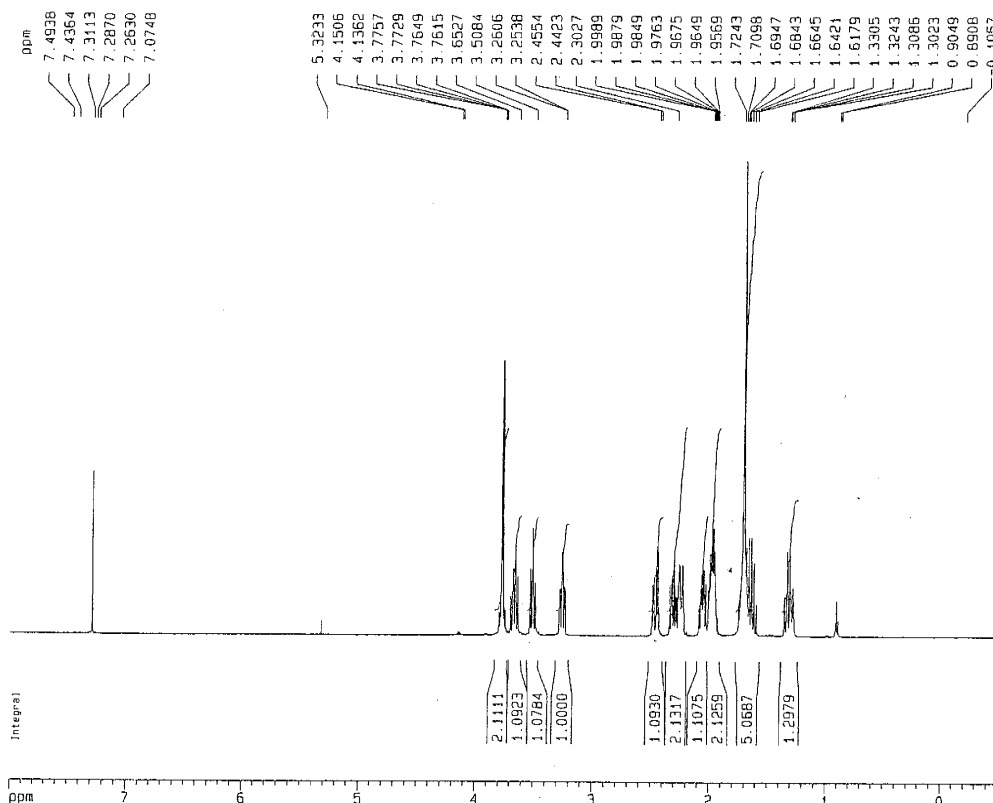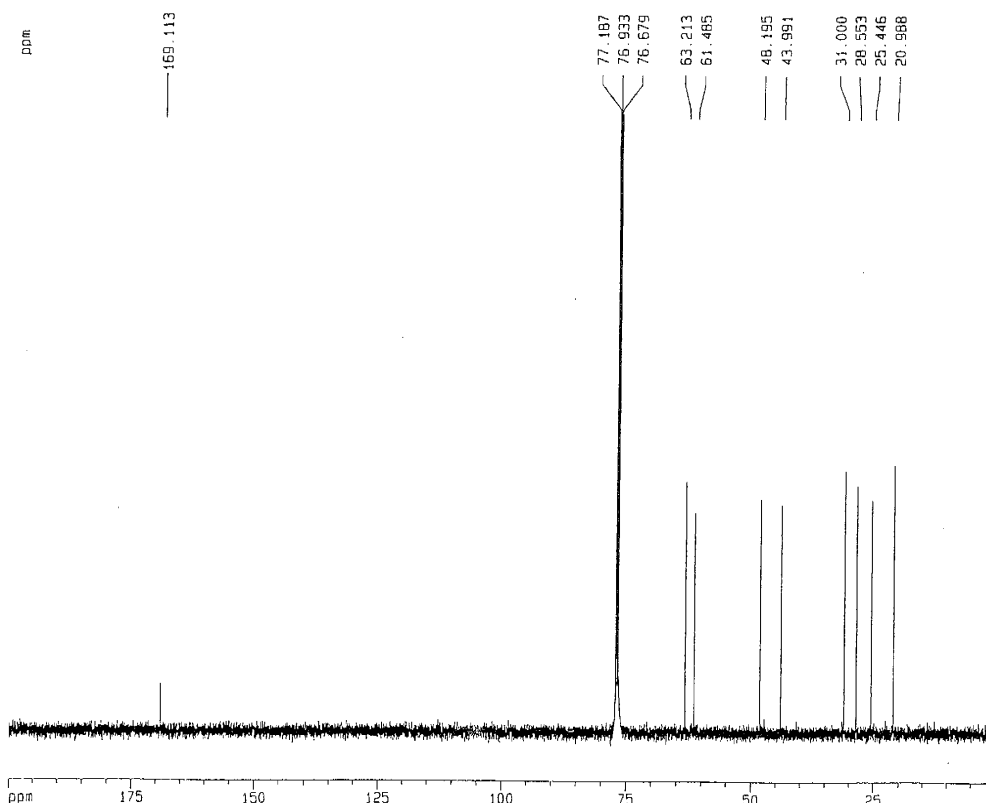

Current Data Parameters  
NAME wj3-42.cryst  
EXPNO 1  
PROCNO 1

F2 - Acquisition Parameters  
Date\_ 20020706  
Time 15:29  
INSTRUM spect  
PROBHD 5 mm BBO BB-1H  
PULPROG zgpg30  
TD 65536  
SOLVENT CDCl3  
NS 3712  
DS 4  
SWH 31446.541 Hz  
FIDRES 0.479836 Hz  
AQ 1.0420893 sec  
RG 10281.3  
DM 15.300 usec  
DE 6.00 usec  
TE 300.0 K  
D1 0.1000000 sec  
D11 0.0300000 sec  
D12 0.0000000 sec

\*\*\*\*\* CHANNEL f1 \*\*\*\*\*  
NUC1 13C  
P1 6.50 usec  
PL1 5.00 dB  
SF01 125.7719472 MHz

\*\*\*\*\* CHANNEL f2 \*\*\*\*\*  
CPDPRG2 waltz16  
MC2 1H  
PCPD2 95.00 usec  
PL2 -4.00 dB  
PL12 19.00 dB  
PL13 30.00 dB  
SF02 500.132500 MHz

F1 - Acquisition Parameters  
ND0 2  
TD 256  
SF01 500.1325 MHz  
FIDRES 23.475000 Hz  
SW 12.016 ppm

F2 - Processing parameters  
SI 65536  
SF 125.7570000 MHz  
KHM EN  
SSB 0  
LB 1.00 Hz  
GB 0  
PC 1.40

F1 - Processing parameters  
SI 1324  
MC2 OF  
SF 500.1300000 MHz  
KHM no  
SSB 0  
LB 0.30 Hz  
GB 0

1D NMR plot parameters  
CX 20.00 cm  
CY 0.00 cm  
F1P 200.000 ppm  
F1 25151.56 Hz  
F2P -0.500 ppm  
F2 -40.00 Hz  
PPHCH 10.02500 ppm/cm  
HZCM 1260.72192 Hz/cm

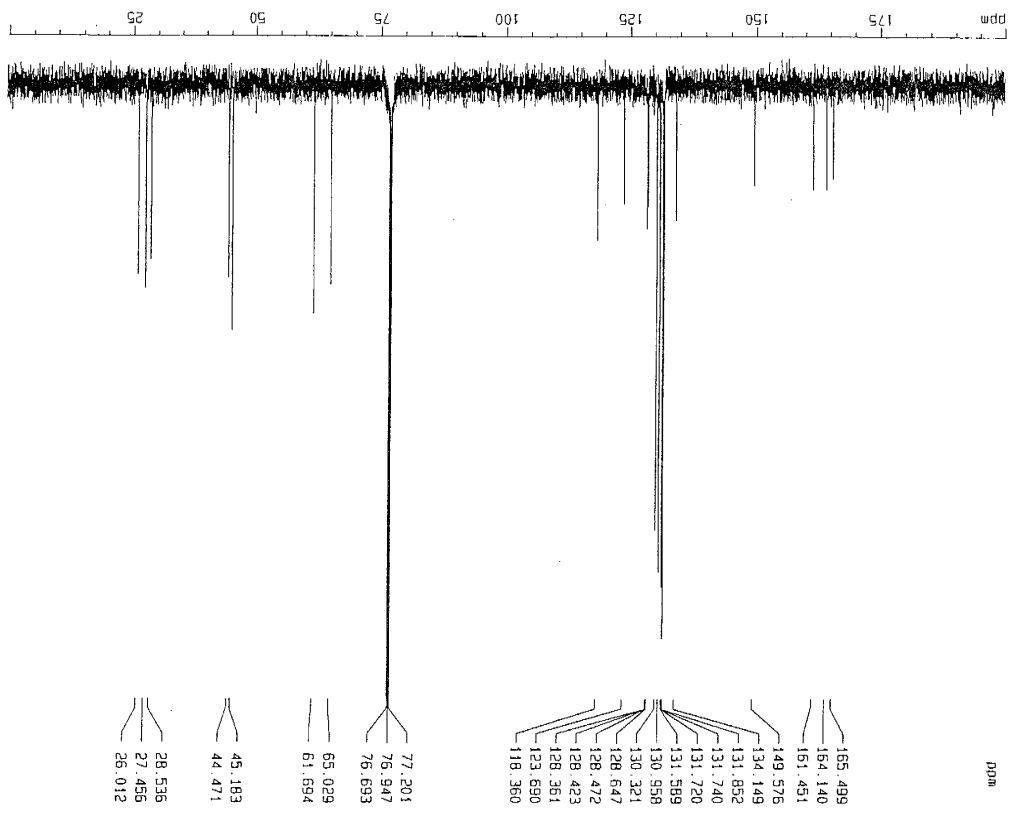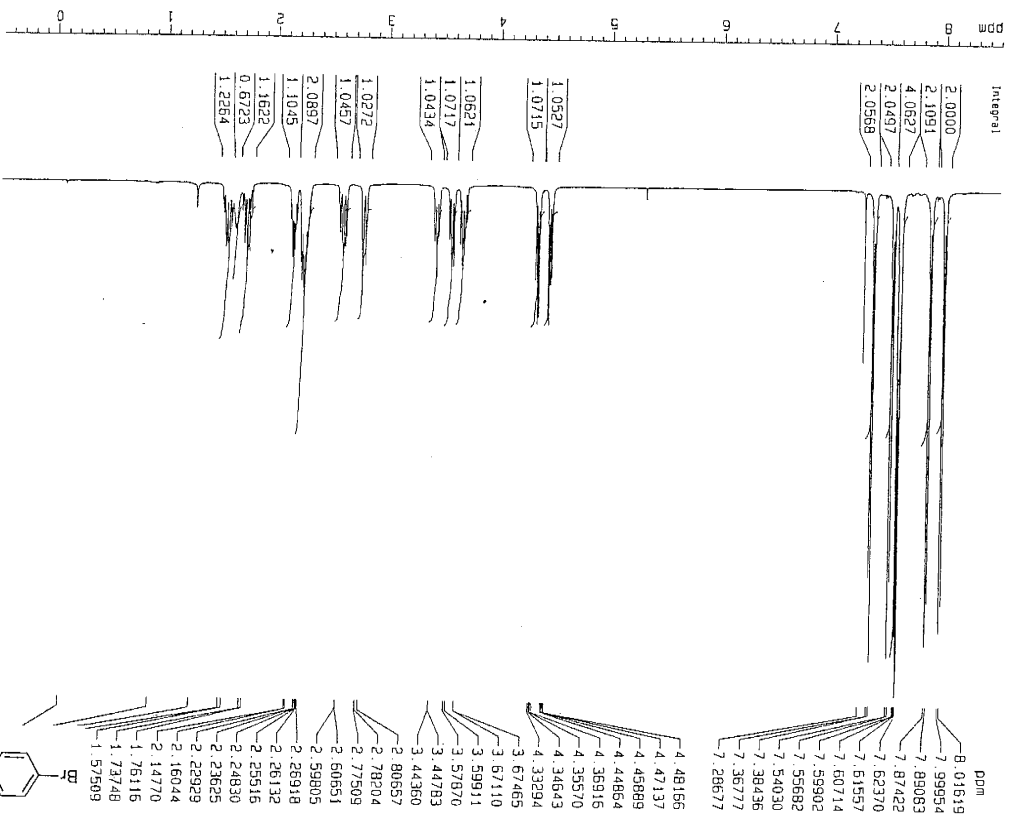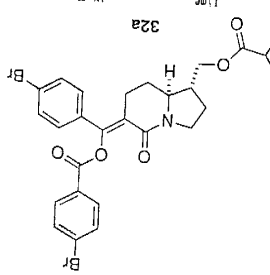

Supplement: NIHMS61495-supplement-text.pdf [file NIHMS61495-supplement-text.pdf]
